# Supplementary material for: The association of parental education with childhood undernutrition in low- and middle-income countries: comparing the role of paternal and maternal education
Source: PubMed Central journal article supplement — Int J Epidemiol. 2016 Aug 8;46(1):312–23. doi: 10.1093/ije/dyw133 (PMC5420755; doi:10.1093/ije/dyw133), 2016-08-08
Supplement: dyw133_supp.pdf [file dyw133_supp.pdf]

# The Association of Parental Education with Childhood Undernutrition in Low- and Middle-Income Countries: Comparing the Role of Paternal and Maternal Education

Sebastian Vollmer<sup>1,2</sup>, Christian Bommer<sup>1</sup>, Aditi Krishna<sup>3</sup>, Kenneth Harttgen<sup>4</sup> and S.V. Subramanian<sup>2\*</sup>

<sup>1</sup>University of Göttingen, Germany, <sup>2</sup> Harvard T.H. Chan School of Public Health, United States, <sup>3</sup> The Hospital for Sick Children, Global Child Health Centre, Toronto, Canada, <sup>4</sup> ETH Zürich, Switzerland

\*Corresponding author. Harvard Center for Population and Development Studies, 9 Bow Street, Cambridge, MA 02138; Email: [sysubram@hsph.harvard.edu](mailto:sysubram@hsph.harvard.edu)

## **Supplementary online appendix**

## Table of contents

### *Appendix A*

|                                                                         |       |
|-------------------------------------------------------------------------|-------|
| Table A1: Estimated undernutrition rates by survey                      | 5 – 6 |
| Table A2: Parental education (estimated means/%) by survey              | 7 – 9 |
| Table A3: Descriptive statistics (all countries weighted equally)       | 10    |
| Table A4: Descriptive statistics (all countries weighted by population) | 11    |

### *Appendix B*

|                                                                                                                          |    |
|--------------------------------------------------------------------------------------------------------------------------|----|
| Table B1: Relationship between parental education levels and stunting in children<br>(linear vs. logistic regression)    | 13 |
| Table B2: Relationship between parental education levels and underweight in children<br>(linear vs. logistic regression) | 14 |
| Table B3: Relationship between parental education levels and wasting in children<br>(linear vs. logistic regression)     | 15 |
| Table B4: Relationship between parental education levels and severe stunting in children                                 | 16 |
| Table B5: Relationship between parental education levels and severe underweight in children                              | 17 |
| Table B6: Relationship between parental education levels and severe wasting in children                                  | 18 |
| Table B7: Years of schooling and severe child undernutrition                                                             | 19 |
| Table B8: Relationship between parental education levels and stunting in children<br>(2007-2014)                         | 20 |
| Table B9: Relationship between parental education levels and underweight in children<br>(2007-2014)                      | 21 |
| Table B10: Relationship between parental education levels and wasting in children<br>(2007-2014)                         | 22 |
| Table B11: Years of schooling and child undernutrition<br>(2007-2014)                                                    | 23 |
| Table B12: Relationship between parental education levels and stunting in children<br>(1999-2006)                        | 24 |
| Table B13: Relationship between parental education levels and underweight in children<br>(1999-2006)                     | 25 |
| Table B14: Relationship between parental education levels and wasting in children<br>(1999-2006)                         | 26 |
| Table B15: Years of schooling and child undernutrition<br>(1999-2006)                                                    | 27 |
| Table B16: Relationship between parental education levels and stunting in children<br>(1990-1998)                        | 28 |
| Table B17: Relationship between parental education levels and underweight in children<br>(1990-1998)                     | 29 |
| Table B18: Relationship between parental education levels and wasting in children<br>(1990-1998)                         | 30 |
| Table B19: Years of schooling and child undernutrition<br>(1990-1998)                                                    | 31 |
| Table B20: Relationship between parental education levels and stunting in children<br>(latest surveys)                   | 32 |

|                                                                                                                             |    |
|-----------------------------------------------------------------------------------------------------------------------------|----|
| Table B21: Relationship between parental education levels and underweight in children<br>(latest surveys)                   | 33 |
| Table B22: Relationship between parental education levels and wasting in children<br>(latest surveys)                       | 34 |
| Table B23: Years of schooling and child undernutrition<br>(latest surveys)                                                  | 35 |
| Table B24: Relationship between parental education levels and stunting in children<br>(adjusted for maternal height)        | 36 |
| Table B25: Relationship between parental education levels and underweight in children<br>(adjusted for maternal height)     | 37 |
| Table B26: Relationship between parental education levels and wasting in children<br>(adjusted for maternal height)         | 38 |
| Table B27: Years of schooling and child undernutrition<br>(adjusted for maternal height)                                    | 39 |
| Table B28: Relationship between parental education levels and stunting in children<br>(countries weighted equally)          | 40 |
| Table B29: Relationship between parental education levels and underweight in children<br>(countries weighted equally)       | 41 |
| Table B30: Relationship between parental education levels and wasting in children<br>(countries weighted equally)           | 42 |
| Table B31: Years of schooling and child undernutrition<br>(countries weighted equally)                                      | 43 |
| Table B32: Relationship between parental education levels and stunting in children<br>(countries weighted by population)    | 44 |
| Table B33: Relationship between parental education levels and underweight in children<br>(countries weighted by population) | 45 |
| Table B34: Relationship between parental education levels and wasting in children<br>(countries weighted by population)     | 46 |
| Table B35: Years of schooling and child undernutrition<br>(countries weighted by population)                                | 47 |
| Figure B1: Test of linearity assumption<br>(stunting)                                                                       | 48 |
| Figure B2: Test of linearity assumption<br>(underweight)                                                                    | 49 |
| Figure B3: Test of linearity assumption<br>(wasting)                                                                        | 50 |
| Figure B4: Ratio of school years<br>(country-wise regressions)                                                              | 51 |
| Figure B5: Binary indicator „mother is better educated“<br>(country-wise regressions)                                       | 52 |

## **Appendix part A: Descriptive statistics**

This part of the appendix provides additional descriptive statistics to supplement the discussion in the article. Tables A1 and A2 provide population estimates for undernutrition and parental schooling for all surveys included in the sample. To adjust for oversampling and non-response, we use individual-level sampling weights as provided in the Demographic and Health Surveys.

Tables A3 and A4 provide pooled population-level estimates for the figures presented in Table 1 in the article. To aggregate population-level estimates over different surveys, we use two different rescaling methods: In Table A3, sampling weights were rescaled such that they add up to 1 for each country. As a consequence, observations from larger surveys are downweighted and those from smaller surveys are upweighted. In contrast, sampling weights in Table A4 add up to the actual population in every country. Doing this is appropriate when the figures should be interpreted as a global individual-level mean.<sup>1</sup>

---

<sup>1</sup> It should be noted, however, that the figures are not necessarily representative for low- and middle-income countries not included in the sample. Additionally, they cannot be extrapolated to high-income countries.

**Table A1: Estimated undernutrition rates by survey**

| Country             | Survey year | Stunted (%) | Wasted (%) | Underweight (%) | Country             | Survey year | Stunted (%) | Wasted (%) | Underweight (%) |
|---------------------|-------------|-------------|------------|-----------------|---------------------|-------------|-------------|------------|-----------------|
| Albania             | 2008        | 22.89       | 9.50       | 6.13            | Haiti               | 2005        | 28.24       | 10.51      | 18.03           |
| Armenia             | 2000        | 17.98       | 2.60       | 2.58            | Haiti               | 2012        | 21.23       | 5.07       | 12.44           |
| Armenia             | 2005        | 17.87       | 5.59       | 4.58            | Honduras            | 2005        | 29.62       | 1.29       | 8.49            |
| Armenia             | 2010        | 20.86       | 4.08       | 5.11            | Honduras            | 2011        | 22.82       | 1.32       | 7.22            |
| Azerbaijan          | 2006        | 27.78       | 6.51       | 8.73            | India               | 1992        | 57.32       | 21.07      | 50.78           |
| Bangladesh          | 1996        | 59.30       | 20.60      | 53.14           | India               | 1998        | 51.40       | 19.67      | 44.48           |
| Bangladesh          | 1999        | 50.45       | 12.46      | 42.18           | India               | 2005        | 48.18       | 19.89      | 43.85           |
| Bangladesh          | 2004        | 50.33       | 15.06      | 43.12           | Jordan              | 1990        | 19.61       | 4.04       | 5.07            |
| Bangladesh          | 2007        | 44.61       | 17.09      | 42.12           | Jordan              | 1997        | 11.15       | 2.38       | 3.94            |
| Bangladesh          | 2011        | 40.89       | 15.85      | 36.81           | Jordan              | 2007        | 16.07       | 7.59       | 6.08            |
| Benin               | 1996        | 34.01       | 17.83      | 26.94           | Jordan              | 2012        | 7.89        | 2.43       | 3.01            |
| Benin               | 2001        | 38.77       | 9.46       | 21.60           | Kazakhstan          | 1999        | 13.47       | 2.62       | 4.20            |
| Benin               | 2006        | 43.70       | 8.44       | 19.86           | Kenya               | 1993        | 40.03       | 6.99       | 20.31           |
| Benin               | 2011        | 49.11       | 15.87      | 23.88           | Kenya               | 1998        | 38.34       | 7.90       | 18.50           |
| Bolivia             | 1994        | 33.45       | 5.40       | 12.49           | Kenya               | 2003        | 36.71       | 5.59       | 15.67           |
| Bolivia             | 1998        | 33.47       | 1.50       | 5.94            | Kenya               | 2008        | 35.30       | 6.70       | 16.17           |
| Bolivia             | 2003        | 32.68       | 1.69       | 5.51            | Kyrgyz Rep.         | 2012        | 18.51       | 2.82       | 3.82            |
| Bolivia             | 2008        | 27.25       | 1.42       | 4.58            | Lesotho             | 2004        | 43.70       | 5.18       | 18.25           |
| Brazil              | 1996        | 12.76       | 2.61       | 4.48            | Lesotho             | 2009        | 38.71       | 4.42       | 14.22           |
| Burkina Faso        | 1993        | 39.96       | 15.48      | 29.49           | Liberia             | 2006        | 39.55       | 7.38       | 18.80           |
| Burkina Faso        | 1998        | 45.18       | 15.78      | 33.97           | Liberia             | 2013        | 30.43       | 5.26       | 14.26           |
| Burkina Faso        | 2003        | 43.16       | 21.36      | 35.40           | Madagascar          | 1992        | 60.79       | 6.19       | 35.17           |
| Burkina Faso        | 2010        | 34.90       | 15.86      | 26.29           | Madagascar          | 1997        | 55.22       | 9.77       | 35.30           |
| Burundi             | 2010        | 58.73       | 5.82       | 28.80           | Madagascar          | 2003        | 52.36       | 15.07      | 35.83           |
| Cambodia            | 2000        | 48.92       | 17.26      | 39.87           | Madagascar          | 2008        | 48.40       |            |                 |
| Cambodia            | 2005        | 42.14       | 8.72       | 28.67           | Malawi              | 1992        | 54.95       | 6.42       | 24.15           |
| Cambodia            | 2010        | 38.25       | 11.52      | 28.09           | Malawi              | 2000        | 53.91       | 6.99       | 21.35           |
| Cameroon            | 1991        | 37.23       | 4.63       | 19.14           | Malawi              | 2004        | 52.23       | 6.42       | 18.42           |
| Cameroon            | 1998        | 34.91       | 8.67       | 17.46           | Malawi              | 2010        | 47.02       | 4.30       | 13.76           |
| Cameroon            | 2004        | 35.71       | 6.40       | 15.61           | Maldives            | 2009        | 19.14       | 11.02      | 17.19           |
| Cameroon            | 2011        | 33.42       | 6.08       | 15.55           | Mali                | 1995        | 37.12       | 27.29      | 38.69           |
| Central Afric. Rep. | 1994        | 39.87       | 9.04       | 23.70           | Mali                | 2001        | 41.96       | 12.77      | 30.21           |
| Chad                | 1996        | 44.89       | 16.56      | 34.21           | Mali                | 2006        | 38.21       | 15.91      | 28.70           |
| Chad                | 2004        | 43.88       | 16.20      | 33.68           | Mali                | 2012        | 37.68       | 13.35      | 26.14           |
| Colombia            | 1995        | 19.18       | 1.51       | 5.76            | Moldova             | 2005        | 10.80       | 6.03       | 3.47            |
| Colombia            | 2000        | 18.23       | 1.05       | 4.99            | Morocco             | 1992        | 29.01       | 2.65       | 7.78            |
| Colombia            | 2004        | 15.99       | 1.53       | 5.07            | Morocco             | 2003        | 23.29       | 10.75      | 9.93            |
| Colombia            | 2009        | 12.73       | 0.91       | 3.50            | Mozambique          | 1997        | 44.47       | 12.51      | 27.30           |
| Comoros             | 1996        | 40.09       | 11.22      | 22.75           | Mozambique          | 2003        | 47.39       | 5.37       | 21.73           |
| Comoros             | 2012        | 30.46       | 11.59      | 16.99           | Mozambique          | 2011        | 43.45       | 6.41       | 15.82           |
| Congo, Dem. Rep.    | 2007        | 45.70       | 10.78      | 25.34           | Namibia             | 1992        | 34.88       | 9.70       | 21.82           |
| Congo, Dem. Rep.    | 2013        | 42.79       | 8.21       | 23.44           | Namibia             | 2000        | 29.27       | 9.27       | 19.78           |
| Congo, Rep.         | 2005        | 30.06       | 7.76       | 11.81           | Namibia             | 2006        | 30.41       | 7.23       | 17.29           |
| Congo, Rep.         | 2011        | 22.71       | 5.75       | 11.73           | Namibia             | 2013        | 19.85       | 8.35       | 13.53           |
| Côte d'Ivoire       | 1994        | 31.31       | 10.91      | 21.02           | Nepal               | 1996        | 57.00       | 15.36      | 42.12           |
| Côte d'Ivoire       | 2011        | 29.77       | 7.80       | 15.97           | Nepal               | 2001        | 57.32       | 11.04      | 43.23           |
| Dominican Republic  | 1991        | 21.05       | 2.20       | 8.14            | Nepal               | 2006        | 50.40       | 12.56      | 39.52           |
| Dominican Republic  | 1996        | 13.07       | 2.04       | 4.31            | Nepal               | 2011        | 40.61       | 11.44      | 29.75           |
| Dominican Republic  | 2002        | 11.52       | 2.04       | 3.99            | Nicaragua           | 1997        | 31.37       | 3.35       | 10.57           |
| Dominican Republic  | 2007        | 10.13       | 2.32       | 3.50            | Nicaragua           | 2001        | 24.93       | 2.25       | 7.88            |
| Dominican Republic  | 2007        | 19.29       | 2.71       | 7.60            | Niger               | 1992        | 47.98       | 18.56      | 41.14           |
| Dominican Republic  | 2013        | 6.58        | 2.05       | 2.90            | Niger               | 1998        | 46.93       | 26.34      | 45.85           |
| Dominican Republic  | 2013        | 8.39        | 2.44       | 5.21            | Niger               | 2006        | 55.36       | 13.08      | 40.43           |
| Egypt               | 1992        | 30.62       | 4.05       | 8.09            | Niger               | 2012        | 42.86       | 18.50      | 38.19           |
| Egypt               | 1995        | 34.47       | 5.42       | 10.44           | Nigeria             | 1990        | 50.61       | 12.03      | 34.67           |
| Egypt               | 2000        | 24.12       | 3.16       | 4.12            | Nigeria             | 2003        | 43.16       | 11.29      | 27.19           |
| Egypt               | 2003        | 19.16       | 5.27       | 7.91            | Nigeria             | 2008        | 40.70       | 14.65      | 27.05           |
| Egypt               | 2005        | 23.90       | 5.18       | 5.45            | Nigeria             | 2013        | 36.78       | 18.35      | 31.39           |
| Egypt               | 2008        | 30.28       | 8.01       | 6.58            | Pakistan            | 1990        | 53.53       | 12.09      | 37.97           |
| Egypt               | 2014        | 22.32       | 9.66       | 6.84            | Pakistan            | 2012        | 44.04       | 10.56      | 31.61           |
| Ethiopia            | 2000        | 57.00       | 12.73      | 41.98           | Paraguay            | 1990        | 17.83       | 0.42       | 2.61            |
| Ethiopia            | 2005        | 49.83       | 12.39      | 34.17           | Peru                | 1991        | 37.68       | 1.92       | 9.01            |
| Ethiopia            | 2011        | 44.43       | 9.95       | 29.57           | Peru                | 1996        | 31.59       | 1.60       | 5.73            |
| Gabon               | 2000        | 25.19       | 4.33       | 9.24            | Peru                | 2000        | 31.79       | 1.09       | 5.24            |
| Gabon               | 2012        | 16.05       | 3.37       | 5.40            | Peru                | 2007        | 28.50       | 0.85       | 4.64            |
| Ghana               | 1993        | 32.86       | 14.79      | 26.18           | Peru                | 2009        | 24.92       | 0.58       | 4.44            |
| Ghana               | 1998        | 31.33       | 9.61       | 20.77           | Peru                | 2010        | 23.91       | 0.68       | 4.32            |
| Ghana               | 2003        | 33.68       | 8.41       | 17.98           | Peru                | 2011        | 19.91       | 0.35       | 4.15            |
| Ghana               | 2008        | 27.52       | 9.23       | 14.34           | Peru                | 2012        | 18.06       | 0.60       | 3.69            |
| Guatemala           | 1995        | 55.50       | 3.82       | 22.02           | Rwanda              | 1992        | 56.15       | 4.81       | 23.56           |
| Guatemala           | 1998        | 53.03       | 2.94       | 19.98           | Rwanda              | 2000        | 47.68       | 8.68       | 19.98           |
| Guinea              | 1999        | 34.36       | 9.96       | 21.10           | Rwanda              | 2005        | 51.25       | 4.64       | 18.21           |
| Guinea              | 2005        | 39.74       | 11.48      | 23.23           | Rwanda              | 2010        | 44.16       | 2.78       | 11.91           |
| Guinea              | 2012        | 31.10       | 10.59      | 18.71           | Sao Tomé & Principe | 2008        | 30.83       | 11.84      | 15.21           |
| Guyana              | 2009        | 20.26       | 5.35       | 12.37           | Senegal             | 1992        | 33.96       | 9.68       | 22.87           |
| Haiti               | 1994        | 38.48       | 9.01       | 24.37           | Senegal             | 2005        | 20.81       | 8.72       | 14.25           |
| Haiti               | 2000        | 27.14       | 5.53       | 13.74           | Senegal             | 2010        | 28.39       | 10.51      | 19.28           |

**Table A1 (continued): Estimated undernutrition rates by survey**

| <b>Country</b> | <b>Survey year</b> | <b>Stunted (%)</b> | <b>Wasted (%)</b> | <b>Underweight (%)</b> | <b>Country</b> | <b>Survey year</b> | <b>Stunted (%)</b> | <b>Wasted (%)</b> | <b>Underweight (%)</b> |
|----------------|--------------------|--------------------|-------------------|------------------------|----------------|--------------------|--------------------|-------------------|------------------------|
| Senegal        | 2012               | 19.09              | 8.88              | 16.91                  | Uganda         | 1995               | 45.57              | 6.75              | 21.72                  |
| Sierra Leone   | 2008               | 38.63              | 10.53             | 21.46                  | Uganda         | 2000               | 45.08              | 5.14              | 19.02                  |
| Sierra Leone   | 2013               | 37.34              | 9.57              | 17.97                  | Uganda         | 2006               | 38.19              | 6.67              | 16.56                  |
| Swaziland      | 2006               | 27.42              | 3.50              | 5.00                   | Uganda         | 2011               | 33.40              | 4.82              | 14.19                  |
| Tanzania       | 1991               | 49.75              | 7.83              | 25.37                  | Zambia         | 1992               | 46.40              | 6.34              | 21.39                  |
| Tanzania       | 1996               | 49.14              | 8.20              | 26.49                  | Zambia         | 1996               | 48.95              | 5.10              | 19.09                  |
| Tanzania       | 2004               | 43.96              | 3.69              | 16.16                  | Zambia         | 2001               | 53.17              | 6.31              | 23.78                  |
| Tanzania       | 2009               | 41.90              | 4.79              | 16.24                  | Zambia         | 2007               | 46.53              | 5.57              | 14.84                  |
| Timor-Leste    | 2009               | 57.11              | 18.74             | 44.47                  | Zambia         | 2013               | 40.13              | 6.04              | 14.99                  |
| Togo           | 1998               | 31.06              | 13.83             | 23.72                  | Zimbabwe       | 1994               | 28.41              | 6.22              | 11.98                  |
| Togo           | 2013               | 26.60              | 6.71              | 15.99                  | Zimbabwe       | 1999               | 32.02              | 8.63              | 10.99                  |
| Turkey         | 1998               | 19.55              | 3.08              | 7.02                   | Zimbabwe       | 2005               | 33.46              | 6.70              | 13.27                  |
| Turkey         | 2003               | 14.95              | 1.01              | 3.28                   | Zimbabwe       | 2010               | 31.83              | 3.31              | 10.02                  |

Table A2: Parental education (estimated means/%) by survey

| Country             | Survey year | Father < Mother (%) | Father = Mother (%) | Father > Mother (%) | Mother higher education (%) | Different education (%) | Mother years of schooling | Father years of schooling | Difference years of schooling |
|---------------------|-------------|---------------------|---------------------|---------------------|-----------------------------|-------------------------|---------------------------|---------------------------|-------------------------------|
| Albania             | 2008        | 12.92               | 63.64               | 23.44               | 14.36                       | 39.98                   | 9.51                      | 9.91                      | 0.40                          |
| Armenia             | 2000        | 14.06               | 67.97               | 17.97               | 29.21                       | 68.81                   | 11.39                     | 11.63                     | 0.24                          |
| Armenia             | 2005        | 44.29               | 44.93               | 10.79               | 28.77                       | 59.00                   | 9.29                      | 9.31                      | 0.03                          |
| Armenia             | 2010        | 26.43               | 64.50               | 9.08                | 36.64                       | 56.84                   | 11.85                     | 11.18                     | -0.67                         |
| Azerbaijan          | 2006        | 11.47               | 60.14               | 28.39               | 26.38                       | 63.54                   | 10.63                     | 11.19                     | 0.57                          |
| Bangladesh          | 1996        | 13.33               | 51.56               | 35.11               | 14.73                       | 53.85                   | 2.30                      | 3.46                      | 1.16                          |
| Bangladesh          | 1999        | 18.52               | 47.83               | 33.65               | 20.05                       | 57.99                   | 2.94                      | 3.75                      | 0.82                          |
| Bangladesh          | 2004        | 24.60               | 47.01               | 28.39               | 26.96                       | 62.30                   | 3.40                      | 3.79                      | 0.39                          |
| Bangladesh          | 2007        | 31.25               | 42.41               | 26.34               | 35.59                       | 68.41                   | 4.57                      | 4.46                      | -0.11                         |
| Bangladesh          | 2011        | 33.27               | 41.62               | 25.11               | 39.20                       | 71.83                   | 5.23                      | 4.96                      | -0.27                         |
| Benin               | 1996        | 7.34                | 63.22               | 29.45               | 8.54                        | 39.04                   | 0.90                      | 2.19                      | 1.29                          |
| Benin               | 2001        | 7.26                | 57.54               | 35.20               | 9.08                        | 46.78                   | 1.26                      | 2.78                      | 1.52                          |
| Benin               | 2006        | 6.84                | 57.90               | 35.27               | 8.41                        | 47.87                   | 1.33                      | 3.20                      | 1.87                          |
| Benin               | 2011        | 7.78                | 60.26               | 31.97               | 9.15                        | 44.76                   | 1.69                      | 3.31                      | 1.62                          |
| Bolivia             | 1994        | 9.36                | 40.62               | 50.02               | 15.29                       | 79.34                   | 5.57                      | 7.58                      | 2.00                          |
| Bolivia             | 1998        | 11.47               | 44.02               | 44.51               | 23.14                       | 78.15                   | 5.99                      | 7.34                      | 1.34                          |
| Bolivia             | 2003        | 11.13               | 52.89               | 35.98               | 20.86                       | 78.71                   | 6.40                      | 7.97                      | 1.57                          |
| Bolivia             | 2008        | 13.61               | 50.65               | 35.74               | 22.89                       | 77.92                   | 7.28                      | 8.70                      | 1.42                          |
| Brazil              | 1996        | 32.68               | 44.87               | 22.46               | 42.61                       | 75.72                   | 5.92                      | 5.46                      | -0.46                         |
| Burkina Faso        | 1993        | 7.01                | 84.63               | 8.36                | 7.16                        | 15.56                   | 0.59                      | 0.67                      | 0.08                          |
| Burkina Faso        | 1998        | 5.30                | 88.93               | 5.77                | 5.29                        | 10.78                   | 0.45                      | 0.46                      | 0.01                          |
| Burkina Faso        | 2003        | 6.88                | 85.31               | 7.81                | 7.57                        | 15.84                   | 0.66                      | 0.74                      | 0.08                          |
| Burkina Faso        | 2010        | 9.17                | 78.69               | 12.14               | 10.09                       | 23.44                   | 0.89                      | 1.07                      | 0.19                          |
| Burundi             | 2010        | 17.93               | 48.03               | 34.03               | 20.79                       | 60.08                   | 2.47                      | 3.21                      | 0.74                          |
| Cambodia            | 2000        | 10.50               | 47.66               | 41.84               | 16.33                       | 72.95                   | 2.94                      | 4.66                      | 1.72                          |
| Cambodia            | 2005        | 12.66               | 46.35               | 40.99               | 20.41                       | 77.79                   | 3.50                      | 5.16                      | 1.67                          |
| Cambodia            | 2010        | 14.66               | 43.51               | 41.83               | 24.44                       | 80.32                   | 4.34                      | 5.85                      | 1.51                          |
| Cameroon            | 1991        | 13.56               | 55.51               | 30.93               | 13.59                       | 54.17                   | 3.35                      | 4.54                      | 1.20                          |
| Cameroon            | 1998        | 12.61               | 55.49               | 31.90               | 16.07                       | 59.95                   | 4.31                      | 5.54                      | 1.22                          |
| Cameroon            | 2004        | 12.14               | 49.34               | 38.52               | 15.71                       | 66.67                   | 4.44                      | 5.88                      | 1.44                          |
| Cameroon            | 2011        | 13.28               | 49.58               | 37.14               | 16.71                       | 66.99                   | 4.83                      | 6.25                      | 1.41                          |
| Central Afric. Rep. | 1994        | 6.70                | 40.61               | 52.69               | 9.82                        | 74.15                   | 2.10                      | 4.79                      | 2.68                          |
| Chad                | 1996        | 4.82                | 66.72               | 28.46               | 5.34                        | 38.76                   | 0.66                      | 2.06                      | 1.40                          |
| Chad                | 2004        | 6.49                | 64.64               | 28.87               | 7.46                        | 41.42                   | 0.92                      | 2.42                      | 1.50                          |
| Colombia            | 1995        | 27.66               | 43.71               | 28.64               | 37.37                       | 75.86                   | 6.51                      | 6.63                      | 0.12                          |
| Colombia            | 2000        | 27.45               | 43.25               | 29.30               | 36.43                       | 75.19                   | 6.98                      | 7.15                      | 0.17                          |
| Colombia            | 2004        | 32.52               | 41.67               | 25.81               | 39.84                       | 73.44                   | 7.71                      | 7.39                      | -0.31                         |
| Colombia            | 2009        | 47.26               | 34.54               | 18.20               | 27.41                       | 87.18                   | 8.69                      | 10.60                     | 1.91                          |
| Comoros             | 1996        | 17.20               | 55.20               | 27.60               | 19.01                       | 49.89                   | 2.24                      | 2.90                      | 0.66                          |
| Comoros             | 2012        | 19.47               | 42.19               | 38.34               | 24.12                       | 69.06                   | 4.05                      | 5.52                      | 1.47                          |
| Congo, Dem. Rep.    | 2007        | 6.51                | 33.09               | 60.40               | 10.64                       | 85.01                   | 4.83                      | 8.12                      | 3.29                          |
| Congo, Dem. Rep.    | 2013        | 7.32                | 29.31               | 63.37               | 9.97                        | 86.61                   | 5.15                      | 8.55                      | 3.40                          |
| Congo, Rep.         | 2005        | 11.10               | 40.57               | 48.33               | 16.88                       | 87.74                   | 6.55                      | 8.92                      | 2.36                          |
| Congo, Rep.         | 2011        | 10.61               | 46.21               | 43.18               | 19.54                       | 85.38                   | 7.22                      | 9.24                      | 2.02                          |
| Côte d'Ivoire       | 1994        | 8.00                | 58.69               | 33.31               | 9.42                        | 45.60                   | 1.56                      | 3.20                      | 1.64                          |
| Côte d'Ivoire       | 2011        | 10.21               | 54.87               | 34.92               | 12.03                       | 49.01                   | 1.76                      | 3.41                      | 1.66                          |
| Dominican Republic  | 1991        | 27.56               | 42.95               | 29.49               | 39.56                       | 82.29                   | 7.42                      | 7.61                      | 0.18                          |
| Dominican Republic  | 1996        | 26.46               | 41.09               | 32.45               | 37.57                       | 82.18                   | 7.64                      | 7.96                      | 0.32                          |
| Dominican Republic  | 2002        | 30.03               | 41.18               | 28.79               | 42.83                       | 83.12                   | 8.26                      | 8.11                      | -0.15                         |
| Dominican Republic  | 2007        | 33.25               | 36.96               | 29.79               | 43.74                       | 83.58                   | 8.93                      | 8.53                      | -0.40                         |
| Dominican Republic  | 2007        | 21.01               | 48.05               | 30.94               | 33.79                       | 78.87                   | 5.07                      | 5.65                      | 0.59                          |
| Dominican Republic  | 2013        | 37.24               | 37.27               | 25.49               | 47.57                       | 81.61                   | 10.31                     | 9.56                      | -0.75                         |
| Dominican Republic  | 2013        | 33.19               | 40.09               | 26.73               | 44.29                       | 81.31                   | 7.29                      | 6.80                      | -0.49                         |
| Egypt               | 1992        | 10.50               | 49.88               | 39.63               | 13.94                       | 59.40                   | 3.87                      | 5.87                      | 1.99                          |
| Egypt               | 1995        | 12.32               | 46.90               | 40.78               | 15.36                       | 62.92                   | 4.91                      | 6.87                      | 1.95                          |
| Egypt               | 2000        | 13.43               | 49.74               | 36.83               | 15.68                       | 61.71                   | 5.82                      | 7.61                      | 1.79                          |
| Egypt               | 2003        | 15.64               | 45.79               | 38.58               | 17.35                       | 69.15                   | 6.56                      | 8.47                      | 1.92                          |
| Egypt               | 2005        | 16.72               | 48.47               | 34.82               | 18.96                       | 70.31                   | 6.85                      | 8.51                      | 1.66                          |
| Egypt               | 2008        | 18.67               | 50.26               | 31.07               | 21.48                       | 70.41                   | 7.69                      | 8.96                      | 1.27                          |
| Egypt               | 2014        | 23.13               | 49.18               | 27.69               | 28.35                       | 67.98                   | 8.73                      | 9.20                      | 0.47                          |
| Ethiopia            | 2000        | 5.46                | 65.70               | 28.85               | 6.46                        | 37.28                   | 0.82                      | 1.95                      | 1.13                          |
| Ethiopia            | 2005        | 7.02                | 60.77               | 32.21               | 8.47                        | 44.64                   | 0.92                      | 2.14                      | 1.22                          |
| Ethiopia            | 2011        | 7.55                | 59.91               | 32.54               | 10.58                       | 51.25                   | 1.34                      | 2.74                      | 1.40                          |
| Gabon               | 2000        | 9.98                | 45.04               | 44.98               | 16.49                       | 83.36                   | 6.08                      | 8.28                      | 2.21                          |
| Gabon               | 2012        | 13.84               | 47.36               | 38.81               | 21.61                       | 82.92                   | 7.48                      | 9.09                      | 1.61                          |
| Ghana               | 1993        | 10.18               | 52.55               | 37.27               | 11.21                       | 77.07                   | 6.31                      | 9.67                      | 3.36                          |
| Ghana               | 1998        | 7.71                | 51.62               | 40.67               | 10.31                       | 65.30                   | 4.80                      | 7.64                      | 2.84                          |
| Ghana               | 2003        | 9.67                | 53.10               | 37.23               | 13.10                       | 62.41                   | 4.54                      | 6.73                      | 2.20                          |
| Ghana               | 2008        | 11.15               | 45.46               | 43.39               | 14.23                       | 67.87                   | 4.97                      | 7.21                      | 2.24                          |
| Guatemala           | 1995        | 15.41               | 47.17               | 37.42               | 20.88                       | 67.26                   | 2.90                      | 3.84                      | 0.94                          |
| Guatemala           | 1998        | 15.20               | 46.08               | 38.72               | 19.94                       | 69.81                   | 3.24                      | 4.34                      | 1.10                          |
| Guinea              | 1999        | 5.59                | 73.51               | 20.91               | 6.07                        | 27.43                   | 0.83                      | 2.25                      | 1.41                          |
| Guinea              | 2005        | 4.87                | 75.43               | 19.70               | 5.30                        | 25.81                   | 0.64                      | 1.92                      | 1.27                          |
| Guinea              | 2012        | 8.07                | 65.72               | 26.22               | 8.96                        | 36.75                   | 1.33                      | 2.78                      | 1.45                          |
| Guyana              | 2009        | 31.20               | 46.97               | 21.83               | 37.95                       | 70.50                   | 8.68                      | 8.36                      | -0.33                         |
| Haiti               | 1994        | 11.55               | 57.02               | 31.43               | 15.81                       | 56.84                   | 2.32                      | 3.40                      | 1.08                          |
| Haiti               | 2000        | 13.88               | 49.00               | 37.12               | 20.05                       | 70.73                   | 2.82                      | 4.22                      | 1.40                          |

Table A2 (continued): Parental education (estimated means/%) by survey

| Country             | Survey year | Father < Mother (%) | Father = Mother (%) | Father > Mother (%) | Mother higher education (%) | Different education (%) | Mother years of schooling | Father years of schooling | Difference years of schooling |
|---------------------|-------------|---------------------|---------------------|---------------------|-----------------------------|-------------------------|---------------------------|---------------------------|-------------------------------|
| Haiti               | 2005        | 14.16               | 48.59               | 37.25               | 20.53                       | 72.10                   | 3.84                      | 5.28                      | 1.44                          |
| Haiti               | 2012        | 15.21               | 52.43               | 32.36               | 23.91                       | 75.42                   | 4.96                      | 6.06                      | 1.10                          |
| Honduras            | 2005        | 45.09               | 40.91               | 14.00               | 37.92                       | 72.74                   | 5.23                      | 5.15                      | -0.08                         |
| Honduras            | 2011        | 32.57               | 42.48               | 24.96               | 41.92                       | 74.69                   | 6.48                      | 6.06                      | -0.42                         |
| India               | 1992        | 6.91                | 47.22               | 45.87               | 8.91                        | 61.39                   | 2.73                      | 5.63                      | 2.90                          |
| India               | 1998        | 9.85                | 42.30               | 47.86               | 12.76                       | 65.96                   | 3.59                      | 6.13                      | 2.54                          |
| India               | 2005        | 12.36               | 48.51               | 39.12               | 15.28                       | 66.55                   | 4.07                      | 6.30                      | 2.23                          |
| Jordan              | 1990        | 18.26               | 35.21               | 46.53               | 24.49                       | 80.52                   | 7.27                      | 8.98                      | 1.72                          |
| Jordan              | 1997        | 25.04               | 38.61               | 36.35               | 33.42                       | 76.85                   | 9.16                      | 9.72                      | 0.56                          |
| Jordan              | 2002        |                     |                     |                     | 38.54                       | 76.49                   | 10.39                     | 10.50                     | 0.11                          |
| Jordan              | 2007        | 29.30               | 48.01               | 22.69               | 40.81                       | 75.19                   | 11.04                     | 10.70                     | -0.34                         |
| Jordan              | 2012        | 31.09               | 48.17               | 20.73               | 45.73                       | 77.32                   | 11.33                     | 10.78                     | -0.56                         |
| Kazakhstan          | 1999        | 13.07               | 68.88               | 18.05               | 27.21                       | 52.78                   | 10.85                     | 10.92                     | 0.07                          |
| Kenya               | 1993        | 13.22               | 42.30               | 44.48               | 18.27                       | 74.81                   | 5.62                      | 7.20                      | 1.58                          |
| Kenya               | 1998        | 13.05               | 37.33               | 49.61               | 22.43                       | 77.02                   | 6.77                      | 8.07                      | 1.31                          |
| Kenya               | 2003        | 14.19               | 40.82               | 44.99               | 23.49                       | 75.90                   | 6.73                      | 7.97                      | 1.24                          |
| Kenya               | 2008        | 13.34               | 42.64               | 44.02               | 21.68                       | 70.59                   | 6.97                      | 8.09                      | 1.12                          |
| Kyrgyz Rep.         | 2012        | 32.65               | 52.99               | 14.36               | 35.41                       | 59.08                   | 12.10                     | 11.73                     | -0.37                         |
| Lesotho             | 2004        | 56.16               | 28.16               | 15.68               | 66.80                       | 85.80                   | 6.92                      | 4.65                      | -2.27                         |
| Lesotho             | 2009        | 59.23               | 30.65               | 10.11               | 62.17                       | 85.16                   | 7.27                      | 5.35                      | -1.92                         |
| Liberia             | 2006        | 7.50                | 35.31               | 57.19               | 8.66                        | 73.06                   | 2.50                      | 5.94                      | 3.44                          |
| Liberia             | 2013        | 10.26               | 33.95               | 55.79               | 13.13                       | 76.10                   | 3.14                      | 6.33                      | 3.19                          |
| Madagascar          | 1992        | 17.66               | 57.67               | 24.67               | 33.44                       | 73.82                   | 3.52                      | 3.69                      | 0.17                          |
| Madagascar          | 1997        | 20.39               | 53.21               | 26.40               | 32.12                       | 73.31                   | 3.41                      | 3.80                      | 0.39                          |
| Madagascar          | 2003        | 27.32               | 49.91               | 22.77               | 29.88                       | 72.97                   | 3.76                      | 4.26                      | 0.50                          |
| Madagascar          | 2008        | 19.50               | 53.84               | 26.66               | 30.02                       | 72.66                   | 3.18                      | 3.67                      | 0.49                          |
| Malawi              | 1992        | 6.08                | 39.79               | 54.13               | 10.63                       | 76.34                   | 2.30                      | 4.94                      | 2.64                          |
| Malawi              | 2000        | 9.18                | 44.16               | 46.66               | 17.03                       | 80.78                   | 3.38                      | 5.51                      | 2.14                          |
| Malawi              | 2004        | 11.97               | 42.04               | 45.99               | 20.09                       | 82.42                   | 4.11                      | 5.99                      | 1.87                          |
| Malawi              | 2010        | 18.02               | 48.67               | 33.31               | 23.07                       | 81.68                   | 4.86                      | 6.39                      | 1.53                          |
| Maldives            | 2009        | 42.97               | 42.89               | 14.14               | 62.10                       | 62.10                   | 4.70                      | 0.00                      | -4.70                         |
| Mali                | 1995        | 7.81                | 79.10               | 13.09               | 7.57                        | 22.15                   | 0.66                      | 1.33                      | 0.68                          |
| Mali                | 2001        | 8.48                | 74.72               | 16.80               | 9.13                        | 26.69                   | 0.79                      | 1.47                      | 0.67                          |
| Mali                | 2006        | 7.56                | 77.18               | 15.26               | 8.29                        | 23.99                   | 0.76                      | 1.26                      | 0.49                          |
| Mali                | 2012        | 9.69                | 77.60               | 12.70               | 9.84                        | 24.11                   | 1.09                      | 1.49                      | 0.39                          |
| Moldova             | 2005        | 18.08               | 65.05               | 16.87               | 28.92                       | 62.21                   | 11.02                     | 11.00                     | -0.02                         |
| Morocco             | 1992        | 5.46                | 66.92               | 27.62               | 5.87                        | 34.81                   | 1.18                      | 2.40                      | 1.21                          |
| Morocco             | 2003        | 12.54               | 52.49               | 34.97               | 15.34                       | 55.75                   | 2.66                      | 4.11                      | 1.45                          |
| Mozambique          | 1997        | 11.50               | 56.12               | 32.39               | 16.04                       | 72.24                   | 2.09                      | 3.35                      | 1.26                          |
| Mozambique          | 2003        | 6.96                | 51.21               | 41.83               | 11.56                       | 72.23                   | 1.93                      | 3.70                      | 1.77                          |
| Mozambique          | 2011        | 10.86               | 51.85               | 37.29               | 17.56                       | 71.60                   | 2.89                      | 4.20                      | 1.31                          |
| Namibia             | 1992        | 24.81               | 49.57               | 25.62               | 33.56                       | 70.76                   | 5.11                      | 5.20                      | 0.10                          |
| Namibia             | 2000        | 27.22               | 42.91               | 29.87               | 35.14                       | 74.83                   | 6.50                      | 6.50                      | -0.01                         |
| Namibia             | 2006        | 31.91               | 47.07               | 21.02               | 35.68                       | 73.62                   | 7.02                      | 6.91                      | -0.11                         |
| Namibia             | 2013        | 28.02               | 42.66               | 29.32               | 34.34                       | 75.40                   | 8.15                      | 8.09                      | -0.05                         |
| Nepal               | 1996        | 2.87                | 41.90               | 55.23               | 3.51                        | 59.04                   | 1.07                      | 3.88                      | 2.81                          |
| Nepal               | 2001        | 4.12                | 42.13               | 53.75               | 4.56                        | 60.82                   | 1.38                      | 4.24                      | 2.86                          |
| Nepal               | 2006        | 6.25                | 37.22               | 56.53               | 7.94                        | 70.24                   | 2.37                      | 5.08                      | 2.71                          |
| Nepal               | 2011        | 9.92                | 38.61               | 51.47               | 11.84                       | 67.48                   | 3.44                      | 5.52                      | 2.08                          |
| Nicaragua           | 1997        | 26.94               | 41.69               | 31.36               | 35.27                       | 75.57                   | 4.99                      | 5.25                      | 0.25                          |
| Nicaragua           | 2001        | 28.59               | 41.34               | 30.06               | 36.36                       | 75.15                   | 5.24                      | 5.32                      | 0.07                          |
| Niger               | 1992        | 6.65                | 87.30               | 6.05                | 6.48                        | 12.36                   | 0.43                      | 0.45                      | 0.02                          |
| Niger               | 1998        | 7.33                | 82.65               | 10.02               | 7.50                        | 17.26                   | 0.63                      | 0.83                      | 0.20                          |
| Niger               | 2006        | 8.69                | 80.00               | 11.31               | 8.94                        | 21.31                   | 0.69                      | 0.95                      | 0.26                          |
| Niger               | 2012        | 8.10                | 78.35               | 13.56               | 8.84                        | 23.39                   | 0.72                      | 1.09                      | 0.37                          |
| Nigeria             | 1990        | 13.41               | 57.60               | 28.99               | 11.31                       | 42.85                   | 2.50                      | 3.70                      | 1.20                          |
| Nigeria             | 2003        | 13.21               | 48.34               | 38.46               | 14.19                       | 55.72                   | 4.12                      | 6.00                      | 1.88                          |
| Nigeria             | 2008        | 12.57               | 53.44               | 33.99               | 13.93                       | 50.88                   | 4.91                      | 6.36                      | 1.44                          |
| Nigeria             | 2013        | 11.38               | 54.73               | 33.89               | 12.69                       | 49.39                   | 4.81                      | 6.43                      | 1.61                          |
| Pakistan            | 1990        | 3.79                | 50.90               | 45.31               | 5.08                        | 53.08                   | 1.68                      | 4.56                      | 2.88                          |
| Pakistan            | 2012        | 13.81               | 38.20               | 47.99               | 15.87                       | 66.46                   | 3.58                      | 5.99                      | 2.41                          |
| Paraguay            | 1990        | 18.17               | 52.32               | 29.52               | 29.93                       | 71.84                   | 5.96                      | 6.35                      | 0.39                          |
| Peru                | 1991        | 12.20               | 41.84               | 45.97               | 16.32                       | 71.64                   | 6.36                      | 7.89                      | 1.53                          |
| Peru                | 1996        | 29.37               | 39.26               | 31.38               | 18.32                       | 71.83                   | 6.38                      | 7.79                      | 1.41                          |
| Peru                | 2000        | 15.10               | 41.85               | 43.06               | 20.34                       | 72.34                   | 7.61                      | 8.97                      | 1.35                          |
| Peru                | 2007        | 16.33               | 44.93               | 38.75               | 22.14                       | 71.54                   | 8.33                      | 9.49                      | 1.16                          |
| Peru                | 2009        | 30.33               | 37.76               | 31.91               | 34.81                       | 74.29                   | 8.77                      | 9.05                      | 0.28                          |
| Peru                | 2010        | 28.78               | 39.80               | 31.42               | 33.54                       | 73.29                   | 8.74                      | 9.03                      | 0.29                          |
| Peru                | 2011        | 30.54               | 38.52               | 30.93               | 34.49                       | 73.81                   | 8.98                      | 9.23                      | 0.25                          |
| Peru                | 2012        | 30.25               | 39.95               | 29.80               | 34.86                       | 73.14                   | 9.04                      | 9.18                      | 0.15                          |
| Rwanda              | 1992        | 18.22               | 50.46               | 31.31               | 27.14                       | 72.07                   | 2.55                      | 3.30                      | 0.75                          |
| Rwanda              | 2000        | 26.56               | 40.61               | 32.83               | 34.39                       | 74.41                   | 3.68                      | 3.97                      | 0.29                          |
| Rwanda              | 2005        | 24.30               | 42.28               | 33.42               | 33.39                       | 78.94                   | 3.81                      | 4.31                      | 0.50                          |
| Rwanda              | 2010        | 23.97               | 46.73               | 29.30               | 34.83                       | 79.48                   | 3.80                      | 4.16                      | 0.37                          |
| Sao Tomé & Príncipe | 2008        | 14.06               | 49.90               | 36.04               | 20.17                       | 74.49                   | 4.92                      | 6.22                      | 1.30                          |
| Senegal             | 1992        | 7.73                | 78.40               | 13.87               | 7.75                        | 21.57                   | 0.97                      | 1.41                      | 0.45                          |
| Senegal             | 2005        | 11.40               | 73.74               | 14.86               | 15.26                       | 31.03                   | 1.82                      | 2.06                      | 0.24                          |
| Senegal             | 2010        | 14.93               | 69.50               | 15.57               | 15.49                       | 33.19                   | 1.56                      | 1.87                      | 0.31                          |
| Senegal             | 2012        | 16.59               | 67.77               | 15.64               | 18.01                       | 36.01                   | 1.87                      | 2.02                      | 0.14                          |



**Table A2 (continued): Parental education (estimated means/%) by survey**

| Country      | Survey year | Father < Mother (%) | Father = Mother (%) | Father > Mother (%) | Mother higher education (%) | Different education (%) | Mother years of schooling | Father years of schooling | Difference years of schooling |
|--------------|-------------|---------------------|---------------------|---------------------|-----------------------------|-------------------------|---------------------------|---------------------------|-------------------------------|
| Sierra Leone | 2008        | 7.02                | 69.36               | 23.62               | 8.14                        | 33.77                   | 1.10                      | 2.45                      | 1.35                          |
| Sierra Leone | 2013        | 11.32               | 63.99               | 24.69               | 12.05                       | 39.32                   | 1.71                      | 2.92                      | 1.20                          |
| Swaziland    | 2006        | 33.25               | 32.33               | 34.42               | 41.61                       | 86.63                   | 7.40                      | 7.50                      | 0.10                          |
| Tanzania     | 1991        | 14.77               | 51.83               | 33.41               | 16.62                       | 52.80                   | 3.85                      | 4.79                      | 0.94                          |
| Tanzania     | 1996        | 14.23               | 53.52               | 32.25               | 15.31                       | 50.59                   | 4.37                      | 5.31                      | 0.95                          |
| Tanzania     | 2004        | 15.63               | 55.46               | 28.91               | 17.48                       | 50.26                   | 4.86                      | 5.64                      | 0.78                          |
| Tanzania     | 2009        | 16.37               | 53.24               | 30.39               | 18.20                       | 51.44                   | 4.84                      | 5.61                      | 0.77                          |
| Timor-Leste  | 2009        | 30.85               | 38.19               | 30.96               | 35.54                       | 73.63                   | 5.97                      | 6.19                      | 0.22                          |
| Togo         | 1998        | 7.41                | 46.29               | 46.29               | 10.01                       | 60.91                   | 1.68                      | 4.02                      | 2.35                          |
| Togo         | 2013        | 11.47               | 41.48               | 47.05               | 15.85                       | 73.68                   | 3.43                      | 5.56                      | 2.13                          |
| Turkey       | 1998        | 11.45               | 42.89               | 45.66               | 8.98                        | 57.57                   | 4.88                      | 6.80                      | 1.92                          |
| Turkey       | 2003        | 10.45               | 40.83               | 48.73               | 11.55                       | 61.32                   | 5.08                      | 7.04                      | 1.96                          |
| Uganda       | 1995        | 9.62                | 35.39               | 54.99               | 15.40                       | 84.14                   | 3.42                      | 5.79                      | 2.37                          |
| Uganda       | 2000        | 11.42               | 40.12               | 48.46               | 19.24                       | 85.73                   | 3.80                      | 6.13                      | 2.33                          |
| Uganda       | 2006        | 13.62               | 43.92               | 42.46               | 21.81                       | 85.49                   | 4.15                      | 6.20                      | 2.06                          |
| Uganda       | 2011        | 16.22               | 43.98               | 39.80               | 26.49                       | 85.49                   | 5.16                      | 6.75                      | 1.59                          |
| Zambia       | 1992        | 10.82               | 32.71               | 56.47               | 14.40                       | 80.23                   | 5.06                      | 6.95                      | 1.89                          |
| Zambia       | 1996        | 10.64               | 33.88               | 55.48               | 13.92                       | 83.39                   | 5.30                      | 7.58                      | 2.27                          |
| Zambia       | 2001        | 11.23               | 32.07               | 56.70               | 15.17                       | 83.04                   | 5.09                      | 7.22                      | 2.13                          |
| Zambia       | 2007        | 13.59               | 33.32               | 53.09               | 19.03                       | 84.57                   | 5.28                      | 7.16                      | 1.88                          |
| Zambia       | 2013        | 13.99               | 36.17               | 49.84               | 19.63                       | 82.49                   | 5.90                      | 7.63                      | 1.73                          |
| Zimbabwe     | 1994        | 15.46               | 48.05               | 36.49               | 23.04                       | 74.98                   | 6.41                      | 7.54                      | 1.13                          |
| Zimbabwe     | 1999        | 15.46               | 39.40               | 45.15               | 18.89                       | 70.52                   | 7.48                      | 8.61                      | 1.13                          |
| Zimbabwe     | 2005        | 14.82               | 56.11               | 29.07               | 19.43                       | 68.22                   | 7.59                      | 8.41                      | 0.81                          |
| Zimbabwe     | 2010        | 12.86               | 56.35               | 30.80               | 18.51                       | 68.92                   | 8.76                      | 9.78                      | 1.02                          |

**Table A3: Descriptive statistics (all countries weighted equally)**

|                                     | <b>Stunting</b> |               | <b>Underweight</b> |               | <b>Wasting</b> |               |
|-------------------------------------|-----------------|---------------|--------------------|---------------|----------------|---------------|
|                                     | Mean/%          | 95%-CI        | Mean/%             | 95%-CI        | Mean/%         | 95%-CI        |
| <b>Undernutrition prevalence</b>    |                 |               |                    |               |                |               |
| Stunting (%)                        | 34.08           | [33.78,34.36] |                    |               |                |               |
| Underweight (%)                     |                 |               | 18.25              | [18.03,18.48] |                |               |
| Wasting (%)                         |                 |               |                    |               | 8.02           | [7.89,8.16]   |
| <b>Maternal education</b>           |                 |               |                    |               |                |               |
| Non or incomplete primary (%)       | 55.46           | [54.94,55.98] | 55.51              | [54.99,56.03] | 55.48          | [54.96,56.00] |
| Primary or incomplete secondary (%) | 30.31           | [29.91,30.71] | 30.28              | [29.88,30.68] | 30.30          | [29.91,30.70] |
| Secondary or higher (%)             | 14.23           | [13.81,14.65] | 14.21              | [13.80,14.64] | 14.21          | [13.80,14.64] |
| <b>Paternal education</b>           |                 |               |                    |               |                |               |
| Non or incomplete primary (%)       | 47.25           | [46.78,47.72] | 47.34              | [46.88,47.81] | 47.31          | [46.84,47.78] |
| Primary or incomplete secondary (%) | 34.69           | [34.33,35.05] | 34.62              | [34.26,34.98] | 34.65          | [34.29,35.02] |
| Secondary or higher (%)             | 18.06           | [17.65,18.48] | 18.04              | [17.63,18.46] | 18.04          | [17.62,18.46] |
| <b>Difference in degrees</b>        |                 |               |                    |               |                |               |
| Father < Mother (%)                 | 17.23           | [16.98,17.47] | 17.22              | [16.98,17.46] | 17.22          | [16.97,17.47] |
| Father = Mother (%)                 | 50.29           | [49.97,50.62] | 50.35              | [50.03,50.67] | 50.33          | [50.00,50.65] |
| Father > Mother (%)                 | 32.48           | [32.18,32.78] | 32.43              | [32.13,32.73] | 32.45          | [32.15,32.76] |
| <b>Years of schooling</b>           |                 |               |                    |               |                |               |
| Maternal school years               | 4.96            | [4.90,5.01]   | 4.95               | [4.90,5.00]   | 4.95           | [4.90,5.01]   |
| Paternal school years               | 5.92            | [5.86,5.97]   | 5.91               | [5.86,5.96]   | 5.91           | [5.86,5.97]   |
| Difference school years             | 0.96            | [0.92,1.00]   | 0.96               | [0.93,0.99]   | 0.96           | [0.93,1.00]   |
| Number of school years differ (%)   | 64.00           | [63.62,64.38] | 63.95              | [63.56,64.32] | 64.00          | [63.62,64.39] |
| Mother better educated (%)          | 22.18           | [21.84,22.52] | 22.18              | [21.84,22.52] | 22.19          | [21.85,22.53] |

This table provides population estimates for the sample-level statistics presented in Table 1. 95% confidence intervals are provided in brackets to the right of each estimate. Sampling weights were rescaled to allow an equal weighting of all countries.

**Table A4: Descriptive statistics (all countries weighted by population)**

|                                     | <b>Stunting</b> |               | <b>Underweight</b> |               | <b>Wasting</b> |               |
|-------------------------------------|-----------------|---------------|--------------------|---------------|----------------|---------------|
|                                     | Mean/%          | 95%-CI        | Mean/%             | 95%-CI        | Mean/%         | 95%-CI        |
| <b>Undernutrition prevalence</b>    |                 |               |                    |               |                |               |
| Stunting (%)                        | 42.48           | [42.02,42.93] |                    |               |                |               |
| Underweight (%)                     |                 |               | 32.05              | [31.50,32.59] |                |               |
| Wasting (%)                         |                 |               |                    |               | 13.56          | [13.27,13.84] |
| <b>Maternal education</b>           |                 |               |                    |               |                |               |
| Non or incomplete primary (%)       | 59.47           | [58.88,60.06] | 60.29              | [59.67,60.91] | 59.62          | [59.03,60.22] |
| Primary or incomplete secondary (%) | 29.13           | [28.67,29.58] | 28.62              | [28.16,29.08] | 29.02          | [28.57,29.48] |
| Secondary or higher (%)             | 11.40           | [11.08,11.73] | 11.09              | [10.77,11.42] | 11.35          | [11.04,11.68] |
| <b>Paternal education</b>           |                 |               |                    |               |                |               |
| Non or incomplete primary (%)       | 45.84           | [45.32,46.36] | 46.70              | [46.17,47.24] | 45.99          | [45.46,46.51] |
| Primary or incomplete secondary (%) | 36.24           | [35.81,36.67] | 35.69              | [35.27,36.12] | 36.14          | [35.70,36.58] |
| Secondary or higher (%)             | 17.92           | [17.54,18.32] | 17.60              | [17.22,17.99] | 17.88          | [17.49,18.27] |
| <b>Difference in degrees</b>        |                 |               |                    |               |                |               |
| Father < Mother (%)                 | 13.70           | [13.41,14.00] | 13.55              | [13.26,13.84] | 13.65          | [13.36,13.95] |
| Father = Mother (%)                 | 48.01           | [47.64,48.39] | 48.28              | [47.92,48.64] | 48.08          | [47.71,48.46] |
| Father > Mother (%)                 | 38.29           | [37.88,38.69] | 38.17              | [37.78,38.56] | 38.26          | [37.86,38.67] |
| <b>Years of schooling</b>           |                 |               |                    |               |                |               |
| Maternal school years               | 4.04            | [3.99, 4.10]  | 3.98               | [3.93,4.04]   | 4.03           | [3.97,4.08]   |
| Paternal school years               | 5.80            | [5.75,5.85]   | 5.73               | [5.68,5.78]   | 5.79           | [5.74,5.84]   |
| Difference school years             | 1.76            | [1.72,1.80]   | 1.75               | [1.71,1.78]   | 1.76           | [1.72,1.80]   |
| Number of school years differ (%)   | 63.61           | [63.20,64.01] | 63.16              | [62.77,63.56] | 63.50          | [63.09,63.90] |
| Mother better educated (%)          | 17.00           | [16.65,17.34] | 16.81              | [16.47,17.15] | 16.94          | [16.60,17.29] |

This table provides population estimates for the sample-level statistics presented in Table 1. 95% confidence intervals are provided in brackets to the right of each estimate. Sampling weights were rescaled to allow weighting of all countries by their population.

## Appendix part B: Regression analyses

This part of the appendix provides robustness checks for the regression analyses provided in the article. Tables B1-B3 present predicted undernutrition prevalences for all combinations of paternal and maternal education levels using logistic regression models. The purpose is to investigate the robustness of the interaction effects models presented in Table 3 to a change in functional form. Due to the incidental parameter problem, one cannot consistently estimate predicted prevalences if local area characteristics (PSU-level fixed effects) are included. We therefore use – unlike in Table 3 – Model 1 and 2, rather than Model 3, to obtain predictions. To make sure that differences between Table 3 and Tables B1-B3 are not caused by a change in control variables, we also provide linear estimates for Model 1 and 2 alongside the logistic regression estimates. The results indicate that our conclusions are largely robust to a change in functional form, although it should be noted that the differences between maternal and paternal education effects are slightly more pronounced in the non-linear case.

Next, we replicate Tables 3 and 4 from the article using severe undernutrition (i.e. by shifting the undernutrition threshold from a z-score of -2 to -3). Our results remain largely robust. Similarly, in Tables B8-B23 we show that our conclusions do not change when the sample is divided into sub-periods (1990-1998, 1999-2006, 2007-2014, only latest survey per country).

In a further robustness check, we re-estimate our main results but further adjust for maternal height in Model 2 and 3. The rationale for this additional control variable is that maternal height may be driven by factors (e.g. past household income/wealth) which might have causally affected maternal education. If maternal height is further correlated to child height (via the intergenerational transmission of undernutrition), this may bias estimated effects of maternal education on child undernutrition. The results of this robustness check (Tables B24-B27), however, indicate that this is not the case.

Moreover, we investigate the robustness of our results to the use of sampling weights in Tables B28-B35. As in Appendix A, we rescale sampling weights such that countries are either weighted equally or by population size. We see the same attenuation of differences in the association of parental education with childhood undernutrition as in our main analysis when all covariates and PSU-level fixed effects are included, regardless of which type of weight is used.

Table 4 in the article provides estimates for marginal effects of paternal and maternal school on stunting, underweight and wasting. The implicate assumption in the analysis was that marginal effects are constant in years of schooling as linear models were used. To test whether this assumption is correct, we repeat the analysis using dummies for every year of schooling (with zero years being the baseline category and all years equal or larger than 17 summarized in one binary indicator as sample sizes decrease drastically beyond this threshold). This way, it is possible to estimate the relationship between parental school years and undernutrition with a maximum of flexibility. The results are presented in Figures B1 – B3. As can be seen, in almost all cases the effects on undernutrition increase in an approximately linear way and are close to the linear trend line which was drawn by multiplying the linear effect estimates from Table 4 by the respective number of school years. This is especially the case when fully adjusted models (i.e. model 3) are considered.

In a final robustness check, we present country-wise regression respectively using differences (Figure B4) and ratios (Figure B5) in years of schooling as exposure (analogously to the country-wise representation of Figure 3 in the article). We find very little heterogeneity in the calculated marginal effects.

**Table B1: Relationship between parental education levels and stunting in children (linear vs. logistic regression)**

|                                            |                                         |                | Mother: Non or incomplete primary | Mother: Primary or incomplete secondary | Mother: Secondary or higher |
|--------------------------------------------|-----------------------------------------|----------------|-----------------------------------|-----------------------------------------|-----------------------------|
| <b>Model 1 (LPM)</b><br>(N = 952 253)      | Father: Non or incomplete primary       | Prevalence (%) | 45.71                             | 36.00                                   | 26.00                       |
|                                            |                                         | 95%-CI         | [45.49,45.92]                     | [35.58,36.42]                           | [24.98,27.02]               |
|                                            |                                         | N              | 405 181                           | 56 307                                  | 6 656                       |
|                                            | Father: Primary or incomplete secondary | Prevalence (%) | 39.83                             | 30.60                                   | 20.73                       |
|                                            |                                         | 95%-CI         | [39.53,40.13]                     | [30.32,30.89]                           | [20.26,21.19]               |
|                                            |                                         | N              | 129 600                           | 140 678                                 | 34 391                      |
|                                            | Father: Secondary or higher             | Prevalence (%) | 35.03                             | 25.93                                   | 19.20                       |
|                                            |                                         | 95%-CI         | [34.43,35.63]                     | [25.53,26.33]                           | [18.87,19.53]               |
|                                            |                                         | N              | 27 910                            | 56 192                                  | 95 338                      |
| <b>Model 1 (logistic)</b><br>(N = 952 253) | Father: Non or incomplete primary       | Prevalence (%) | 45.52                             | 36.06                                   | 24.96                       |
|                                            |                                         | 95%-CI         | [45.30,45.73]                     | [35.63,36.48]                           | [23.75,26.16]               |
|                                            |                                         | N              | 405 181                           | 56 307                                  | 6 656                       |
|                                            | Father: Primary or incomplete secondary | Prevalence (%) | 39.68                             | 30.66                                   | 19.62                       |
|                                            |                                         | 95%-CI         | [39.39,39.98]                     | [30.37,30.94]                           | [19.12,20.11]               |
|                                            |                                         | N              | 129 600                           | 140 678                                 | 34 391                      |
|                                            | Father: Secondary or higher             | Prevalence (%) | 35.01                             | 25.92                                   | 18.52                       |
|                                            |                                         | 95%-CI         | [34.42,35.60]                     | [25.52,26.31]                           | [18.19,18.85]               |
|                                            |                                         | N              | 27 910                            | 56 192                                  | 95 338                      |
| <b>Model 2 (LPM)</b><br>(N = 952 253)      | Father: Non or incomplete primary       | Prevalence (%) | 42.07                             | 35.87                                   | 30.38                       |
|                                            |                                         | 95%-CI         | [41.86,42.29]                     | [35.45,36.28]                           | [29.35,31.40]               |
|                                            |                                         | N              | 405 181                           | 56 307                                  | 6 656                       |
|                                            | Father: Primary or incomplete secondary | Prevalence (%) | 38.72                             | 32.83                                   | 27.57                       |
|                                            |                                         | 95%-CI         | [38.42,39.01]                     | [32.54,33.11]                           | [27.10,28.05]               |
|                                            |                                         | N              | 129 600                           | 140 678                                 | 34 391                      |
|                                            | Father: Secondary or higher             | Prevalence (%) | 35.86                             | 30.15                                   | 27.45                       |
|                                            |                                         | 95%-CI         | [35.27,36.45]                     | [29.75,30.55]                           | [27.10,27.81]               |
|                                            |                                         | N              | 27 910                            | 56 192                                  | 95 338                      |
| <b>Model 2 (logistic)</b><br>(N = 952 253) | Father: Non or incomplete primary       | Prevalence (%) | 41.69                             | 36.03                                   | 28.99                       |
|                                            |                                         | 95%-CI         | [41.48,41.90]                     | [35.62,36.45]                           | [27.69,30.29]               |
|                                            |                                         | N              | 405 181                           | 56 307                                  | 6 656                       |
|                                            | Father: Primary or incomplete secondary | Prevalence (%) | 38.59                             | 32.99                                   | 25.48                       |
|                                            |                                         | 95%-CI         | [38.31,38.88]                     | [32.70,33.28]                           | [24.89,26.07]               |
|                                            |                                         | N              | 129 600                           | 140 678                                 | 34 391                      |
|                                            | Father: Secondary or higher             | Prevalence (%) | 35.88                             | 29.96                                   | 25.32                       |
|                                            |                                         | 95%-CI         | [35.29,36.47]                     | [29.53,30.40]                           | [24.91,25.73]               |
|                                            |                                         | N              | 27 910                            | 56 192                                  | 95 338                      |

The table presents unweighted predicted prevalences of stunting with 95% confidence intervals in square brackets below. All models include the depicted parental education levels and their interaction. Model 1 is adjusted for child age, sex and country-level fixed effects. Model 2 is further adjusted for birth order, whether the child was born in a multiple birth, maternal age and partnership status, urban location of household as well as its wealth quintile as measured by household asset ownership. All standard errors were clustered on the PSU-level.

**Table B2: Relationship between parental education levels and underweight in children (linear vs. logistic regression)**

|                                            |                                         |                | Mother: Non or incomplete primary | Mother: Primary or incomplete secondary | Mother: Secondary or higher |
|--------------------------------------------|-----------------------------------------|----------------|-----------------------------------|-----------------------------------------|-----------------------------|
| <b>Model 1 (LPM)</b><br>(N = 981 740)      | Father: Non or incomplete primary       | Prevalence (%) | 27.18                             | 19.03                                   | 15.79                       |
|                                            |                                         | 95%-CI         | [26.99,27.37]                     | [18.70,19.36]                           | [15.12,16.46]               |
|                                            |                                         | N              | 419 823                           | 57 541                                  | 6 833                       |
|                                            | Father: Primary or incomplete secondary | Prevalence (%) | 21.65                             | 15.12                                   | 12.14                       |
|                                            |                                         | 95%-CI         | [21.40,21.90]                     | [14.90,15.34]                           | [11.82,12.46]               |
|                                            |                                         | N              | 133 963                           | 144 192                                 | 34 966                      |
|                                            | Father: Secondary or higher             | Prevalence (%) | 18.69                             | 12.69                                   | 11.12                       |
|                                            |                                         | 95%-CI         | [18.22,19.17]                     | [12.40,12.99]                           | [10.86,11.38]               |
|                                            |                                         | N              | 28 955                            | 57 825                                  | 97 642                      |
| <b>Model 1 (logistic)</b><br>(N = 981 740) | Father: Non or incomplete primary       | Prevalence (%) | 26.46                             | 18.90                                   | 14.11                       |
|                                            |                                         | 95%-CI         | [26.29,26.64]                     | [18.56,19.25]                           | [13.05,15.16]               |
|                                            |                                         | N              | 419 823                           | 57 541                                  | 6 833                       |
|                                            | Father: Primary or incomplete secondary | Prevalence (%) | 21.34                             | 15.05                                   | 10.19                       |
|                                            |                                         | 95%-CI         | [21.11,21.58]                     | [14.84,15.26]                           | [9.79,10.58]                |
|                                            |                                         | N              | 133 963                           | 144 192                                 | 34 966                      |
|                                            | Father: Secondary or higher             | Prevalence (%) | 18.58                             | 12.41                                   | 8.94                        |
|                                            |                                         | 95%-CI         | [18.11,19.06]                     | [12.11,12.71]                           | [8.68,9.21]                 |
|                                            |                                         | N              | 28 955                            | 57 825                                  | 97 642                      |
| <b>Model 2 (LPM)</b><br>(N = 981 740)      | Father: Non or incomplete primary       | Prevalence (%) | 24.87                             | 18.98                                   | 18.43                       |
|                                            |                                         | 95%-CI         | [24.68,25.05]                     | [18.65,19.31]                           | [17.74,19.11]               |
|                                            |                                         | N              | 419 823                           | 57 541                                  | 6 833                       |
|                                            | Father: Primary or incomplete secondary | Prevalence (%) | 21.00                             | 16.59                                   | 16.43                       |
|                                            |                                         | 95%-CI         | [20.76,21.25]                     | [16.37,16.82]                           | [16.10,16.76]               |
|                                            |                                         | N              | 133 963                           | 144 192                                 | 34 966                      |
|                                            | Father: Secondary or higher             | Prevalence (%) | 19.31                             | 15.45                                   | 16.26                       |
|                                            |                                         | 95%-CI         | [18.84,19.78]                     | [15.14,15.75]                           | [15.98,16.54]               |
|                                            |                                         | N              | 28 955                            | 57 825                                  | 97 642                      |
| <b>Model 2 (logistic)</b><br>(N = 981 740) | Father: Non or incomplete primary       | Prevalence (%) | 24.16                             | 19.18                                   | 16.44                       |
|                                            |                                         | 95%-CI         | [23.99,24.32]                     | [18.83,19.52]                           | [15.25,17.63]               |
|                                            |                                         | N              | 419 823                           | 57 541                                  | 6 833                       |
|                                            | Father: Primary or incomplete secondary | Prevalence (%) | 20.99                             | 16.67                                   | 13.48                       |
|                                            |                                         | 95%-CI         | [20.76,21.22]                     | [16.44,16.90]                           | [12.98,13.98]               |
|                                            |                                         | N              | 133 963                           | 144 192                                 | 34 966                      |
|                                            | Father: Secondary or higher             | Prevalence (%) | 19.35                             | 14.87                                   | 12.63                       |
|                                            |                                         | 95%-CI         | [18.86,19.84]                     | [14.53,15.22]                           | [12.27,12.99]               |
|                                            |                                         | N              | 28 955                            | 57 825                                  | 97 642                      |

The table presents unweighted predicted prevalences of underweight with 95% confidence intervals in square brackets below. All models include the depicted parental education levels and their interaction. Model 1 is adjusted for child age, sex and country-level fixed effects. Model 2 is further adjusted for birth order, whether the child was born in a multiple birth, maternal age and partnership status, urban location of household as well as its wealth quintile as measured by household asset ownership. All standard errors were clustered on the PSU-level.

**Table B3: Relationship between parental education levels and wasting in children (linear vs. logistic regression)**

|                                            |                                         |                | Mother: Non or incomplete primary | Mother: Primary or incomplete secondary | Mother: Secondary or higher |
|--------------------------------------------|-----------------------------------------|----------------|-----------------------------------|-----------------------------------------|-----------------------------|
| <b>Model 1 (LPM)</b><br>(N = 941 721)      | Father: Non or incomplete primary       | Prevalence (%) | 10.60                             | 8.33                                    | 8.31                        |
|                                            |                                         | 95%-CI         | [10.47,10.73]                     | [8.10,8.57]                             | [7.72,8.89]                 |
|                                            |                                         | N              | 400 355                           | 55 588                                  | 6 602                       |
|                                            | Father: Primary or incomplete secondary | Prevalence (%) | 8.73                              | 7.44                                    | 6.84                        |
|                                            |                                         | 95%-CI         | [8.56,8.89]                       | [7.28,7.59]                             | [6.59,7.09]                 |
|                                            |                                         | N              | 128 315                           | 139 109                                 | 34 063                      |
|                                            | Father: Secondary or higher             | Prevalence (%) | 8.19                              | 6.78                                    | 6.95                        |
|                                            |                                         | 95%-CI         | [7.84,8.53]                       | [6.56,7.01]                             | [6.75,7.14]                 |
|                                            |                                         | N              | 27 689                            | 55 652                                  | 94 348                      |
| <b>Model 1 (logistic)</b><br>(N = 941 721) | Father: Non or incomplete primary       | Prevalence (%) | 10.38                             | 8.26                                    | 8.14                        |
|                                            |                                         | 95%-CI         | [10.26,10.50]                     | [8.00,8.52]                             | [7.28,9.00]                 |
|                                            |                                         | N              | 400 355                           | 55 588                                  | 6 602                       |
|                                            | Father: Primary or incomplete secondary | Prevalence (%) | 8.64                              | 7.37                                    | 6.31                        |
|                                            |                                         | 95%-CI         | [8.48,8.81]                       | [7.21,7.53]                             | [5.97,6.65]                 |
|                                            |                                         | N              | 128 315                           | 139 109                                 | 34 063                      |
|                                            | Father: Secondary or higher             | Prevalence (%) | 8.09                              | 6.67                                    | 6.61                        |
|                                            |                                         | 95%-CI         | [7.76,8.41]                       | [6.44,6.91]                             | [6.38,6.83]                 |
|                                            |                                         | N              | 27 689                            | 55 652                                  | 94 348                      |
| <b>Model 2 (LPM)</b><br>(N = 941 721)      | Father: Non or incomplete primary       | Prevalence (%) | 10.06                             | 8.36                                    | 8.84                        |
|                                            |                                         | 95%-CI         | [9.93,10.19]                      | [8.12,8.59]                             | [8.26,9.43]                 |
|                                            |                                         | N              | 400 355                           | 55 588                                  | 6 602                       |
|                                            | Father: Primary or incomplete secondary | Prevalence (%) | 8.61                              | 7.81                                    | 7.75                        |
|                                            |                                         | 95%-CI         | [8.44,8.78]                       | [7.66,7.97]                             | [7.49,8.02]                 |
|                                            |                                         | N              | 128 315                           | 139 109                                 | 34 063                      |
|                                            | Father: Secondary or higher             | Prevalence (%) | 8.36                              | 7.45                                    | 8.03                        |
|                                            |                                         | 95%-CI         | [8.02,8.70]                       | [7.22,7.68]                             | [7.81,8.25]                 |
|                                            |                                         | N              | 27 689                            | 55 652                                  | 94 348                      |
| <b>Model 2 (logistic)</b><br>(N = 941 721) | Father: Non or incomplete primary       | Prevalence (%) | 9.86                              | 8.36                                    | 8.70                        |
|                                            |                                         | 95%-CI         | [9.74,9.98]                       | [8.10,8.62]                             | [7.79,9.61]                 |
|                                            |                                         | N              | 400 355                           | 55 588                                  | 6 602                       |
|                                            | Father: Primary or incomplete secondary | Prevalence (%) | 8.61                              | 7.80                                    | 7.11                        |
|                                            |                                         | 95%-CI         | [8.44,8.77]                       | [7.63,7.97]                             | [6.72,7.49]                 |
|                                            |                                         | N              | 128 315                           | 139 109                                 | 34 063                      |
|                                            | Father: Secondary or higher             | Prevalence (%) | 8.31                              | 7.31                                    | 7.57                        |
|                                            |                                         | 95%-CI         | [7.97,8.65]                       | [7.05,7.57]                             | [7.30,7.85]                 |
|                                            |                                         | N              | 27 689                            | 55 652                                  | 94 348                      |

The table presents unweighted predicted prevalences of wasting with 95% confidence intervals in square brackets below. All models include the depicted parental education levels and their interaction. Model 1 is adjusted for child age, sex and country-level fixed effects. Model 2 is further adjusted for birth order, whether the child was born in a multiple birth, maternal age and partnership status, urban location of household as well as its wealth quintile as measured by household asset ownership. All standard errors were clustered on the PSU-level.

**Table B4: Relationship between parental education levels and severe stunting in children**

|                                 |                                         |                | Mother: Non or incomplete primary | Mother: Primary or incomplete secondary | Mother: Secondary or higher |
|---------------------------------|-----------------------------------------|----------------|-----------------------------------|-----------------------------------------|-----------------------------|
| <b>Model 1</b><br>(N = 952 253) | Father: Non or incomplete primary       | Prevalence (%) | 23.08                             | 15.14                                   | 10.80                       |
|                                 |                                         | 95%-CI         | [22.90,23.26]                     | [14.82,15.45]                           | [10.16,11.44]               |
|                                 |                                         | N              | 405 181                           | 56 307                                  | 6 656                       |
|                                 | Father: Primary or incomplete secondary | Prevalence (%) | 18.21                             | 11.88                                   | 8.38                        |
|                                 |                                         | 95%-CI         | [17.96,18.45]                     | [11.68,12.08]                           | [8.09,8.68]                 |
|                                 |                                         | N              | 129 600                           | 140 678                                 | 34 391                      |
|                                 | Father: Secondary or higher             | Prevalence (%) | 15.41                             | 9.59                                    | 7.90                        |
|                                 |                                         | 95%-CI         | [14.95,15.87]                     | [9.32,9.86]                             | [7.68,8.12]                 |
|                                 |                                         | N              | 27 910                            | 56 192                                  | 95 338                      |
| <b>Model 2</b><br>(N = 952 253) | Father: Non or incomplete primary       | Prevalence (%) | 20.75                             | 15.10                                   | 13.57                       |
|                                 |                                         | 95%-CI         | [20.57,20.93]                     | [14.79,15.41]                           | [12.92,14.22]               |
|                                 |                                         | N              | 405 181                           | 56 307                                  | 6 656                       |
|                                 | Father: Primary or incomplete secondary | Prevalence (%) | 17.53                             | 13.35                                   | 12.71                       |
|                                 |                                         | 95%-CI         | [17.29,17.77]                     | [13.14,13.55]                           | [12.40,13.02]               |
|                                 |                                         | N              | 129 600                           | 140 678                                 | 34 391                      |
|                                 | Father: Secondary or higher             | Prevalence (%) | 15.97                             | 12.29                                   | 13.06                       |
|                                 |                                         | 95%-CI         | [15.51,16.42]                     | [12.01,12.58]                           | [12.81,13.31]               |
|                                 |                                         | N              | 27 910                            | 56 192                                  | 95 338                      |
| <b>Model 3</b><br>(N = 952 253) | Father: Non or incomplete primary       | Prevalence (%) | 19.55                             | 16.39                                   | 14.70                       |
|                                 |                                         | 95%-CI         | [19.40,19.70]                     | [16.06,16.72]                           | [13.98,15.43]               |
|                                 |                                         | N              | 405 181                           | 56 307                                  | 6 656                       |
|                                 | Father: Primary or incomplete secondary | Prevalence (%) | 17.50                             | 14.66                                   | 14.35                       |
|                                 |                                         | 95%-CI         | [17.27,17.74]                     | [14.43,14.88]                           | [14.00,14.70]               |
|                                 |                                         | N              | 129 600                           | 140 678                                 | 34 391                      |
|                                 | Father: Secondary or higher             | Prevalence (%) | 16.00                             | 13.45                                   | 14.15                       |
|                                 |                                         | 95%-CI         | [15.51,16.49]                     | [13.14,13.76]                           | [13.87,14.43]               |
|                                 |                                         | N              | 27 910                            | 56 192                                  | 95 338                      |

The table presents unweighted predicted prevalences of severe stunting with 95% confidence intervals in square brackets below. All models include the depicted parental education levels and their interaction. Model 1 is adjusted for child age, sex and country-level fixed effects. Model 2 is further adjusted for birth order, whether the child was born in a multiple birth, maternal age and partnership status, urban location of household as well as its wealth quintile as measured by household asset ownership. Lastly, Model 3 includes all covariates and PSU-level fixed effects. All standard errors were clustered on the PSU-level.



**Table B5: Relationship between parental education levels and severe underweight in children**

|                                 |                                         |                | Mother: Non or incomplete primary | Mother: Primary or incomplete secondary | Mother: Secondary or higher |
|---------------------------------|-----------------------------------------|----------------|-----------------------------------|-----------------------------------------|-----------------------------|
| <b>Model 1</b><br>(N = 981 740) | Father: Non or incomplete primary       | Prevalence (%) | 10.77                             | 6.05                                    | 5.00                        |
|                                 |                                         | 95%-CI         | [10.63,10.91]                     | [5.84,6.25]                             | [4.64,5.36]                 |
|                                 |                                         | N              | 419 823                           | 57 541                                  | 6 833                       |
|                                 | Father: Primary or incomplete secondary | Prevalence (%) | 7.48                              | 4.40                                    | 3.72                        |
|                                 |                                         | 95%-CI         | [7.33,7.64]                       | [4.27,4.54]                             | [3.54,3.91]                 |
|                                 |                                         | N              | 133 963                           | 144 192                                 | 34 966                      |
|                                 | Father: Secondary or higher             | Prevalence (%) | 6.66                              | 3.60                                    | 3.40                        |
|                                 |                                         | 95%-CI         | [6.34,6.98]                       | [3.42,3.78]                             | [3.25,3.55]                 |
|                                 |                                         | N              | 28 955                            | 57 825                                  | 97 642                      |
| <b>Model 2</b><br>(N = 981 740) | Father: Non or incomplete primary       | Prevalence (%) | 9.64                              | 6.05                                    | 6.30                        |
|                                 |                                         | 95%-CI         | [9.51,9.78]                       | [5.84,6.25]                             | [5.93,6.67]                 |
|                                 |                                         | N              | 419 823                           | 57 541                                  | 6 833                       |
|                                 | Father: Primary or incomplete secondary | Prevalence (%) | 7.18                              | 5.14                                    | 5.81                        |
|                                 |                                         | 95%-CI         | [7.03,7.34]                       | [5.01,5.27]                             | [5.61,6.01]                 |
|                                 |                                         | N              | 133 963                           | 144 192                                 | 34 966                      |
|                                 | Father: Secondary or higher             | Prevalence (%) | 6.96                              | 4.93                                    | 5.86                        |
|                                 |                                         | 95%-CI         | [6.64,7.28]                       | [4.75,5.12]                             | [5.69,6.03]                 |
|                                 |                                         | N              | 28 955                            | 57 825                                  | 97 642                      |
| <b>Model 3</b><br>(N = 981 740) | Father: Non or incomplete primary       | Prevalence (%) | 9.01                              | 6.82                                    | 6.36                        |
|                                 |                                         | 95%-CI         | [8.90,9.11]                       | [6.60,7.04]                             | [5.94,6.77]                 |
|                                 |                                         | N              | 419 823                           | 57 541                                  | 6 833                       |
|                                 | Father: Primary or incomplete secondary | Prevalence (%) | 7.39                              | 6.02                                    | 6.28                        |
|                                 |                                         | 95%-CI         | [7.23,7.55]                       | [5.87,6.17]                             | [6.07,6.49]                 |
|                                 |                                         | N              | 133 963                           | 144 192                                 | 34 966                      |
|                                 | Father: Secondary or higher             | Prevalence (%) | 6.86                              | 5.59                                    | 6.03                        |
|                                 |                                         | 95%-CI         | [6.52,7.20]                       | [5.39,5.80]                             | [5.86,6.20]                 |
|                                 |                                         | N              | 28 955                            | 57 825                                  | 97 642                      |

The table presents unweighted predicted prevalences of severe underweight with 95% confidence intervals in square brackets below. All models include the depicted parental education levels and their interaction. Model 1 is adjusted for child age, sex and country-level fixed effects. Model 2 is further adjusted for birth order, whether the child was born in a multiple birth, maternal age and partnership status, urban location of household as well as its wealth quintile as measured by household asset ownership. Lastly, Model 3 includes all covariates and PSU-level fixed effects. All standard errors were clustered on the PSU-level.

**Table B6: Relationship between parental education levels and severe wasting in children**

|                                 |                                         |                | Mother: Non or incomplete primary | Mother: Primary or incomplete secondary | Mother: Secondary or higher |
|---------------------------------|-----------------------------------------|----------------|-----------------------------------|-----------------------------------------|-----------------------------|
| <b>Model 1</b><br>(N = 941 721) | Father: Non or incomplete primary       | Prevalence (%) | 4.08                              | 3.01                                    | 3.21                        |
|                                 |                                         | 95%-CI         | [4.00,4.16]                       | [2.87,3.15]                             | [2.82,3.60]                 |
|                                 |                                         | N              | 400 355                           | 55 588                                  | 6 602                       |
|                                 | Father: Primary or incomplete secondary | Prevalence (%) | 3.19                              | 2.64                                    | 2.47                        |
|                                 |                                         | 95%-CI         | [3.09,3.30]                       | [2.55,2.73]                             | [2.32,2.63]                 |
|                                 |                                         | N              | 128 315                           | 139 109                                 | 34 063                      |
|                                 | Father: Secondary or higher             | Prevalence (%) | 2.90                              | 2.41                                    | 2.60                        |
|                                 |                                         | 95%-CI         | [2.68,3.13]                       | [2.27,2.55]                             | [2.48,2.72]                 |
|                                 |                                         | N              | 27 689                            | 55 652                                  | 94 348                      |
| <b>Model 2</b><br>(N = 941 721) | Father: Non or incomplete primary       | Prevalence (%) | 3.86                              | 3.02                                    | 3.45                        |
|                                 |                                         | 95%-CI         | [3.77,3.94]                       | [2.87,3.16]                             | [3.06,3.84]                 |
|                                 |                                         | N              | 400 355                           | 55 588                                  | 6 602                       |
|                                 | Father: Primary or incomplete secondary | Prevalence (%) | 3.14                              | 2.79                                    | 2.86                        |
|                                 |                                         | 95%-CI         | [3.04,3.25]                       | [2.70,2.89]                             | [2.70,3.03]                 |
|                                 |                                         | N              | 128 315                           | 139 109                                 | 34 063                      |
|                                 | Father: Secondary or higher             | Prevalence (%) | 2.97                              | 2.68                                    | 3.06                        |
|                                 |                                         | 95%-CI         | [2.75,3.19]                       | [2.53,2.82]                             | [2.92,3.20]                 |
|                                 |                                         | N              | 27 689                            | 55 652                                  | 94 348                      |
| <b>Model 3</b><br>(N = 941 721) | Father: Non or incomplete primary       | Prevalence (%) | 3.69                              | 3.14                                    | 3.07                        |
|                                 |                                         | 95%-CI         | [3.62,3.76]                       | [2.98,3.30]                             | [2.66,3.48]                 |
|                                 |                                         | N              | 400 355                           | 55 588                                  | 6 602                       |
|                                 | Father: Primary or incomplete secondary | Prevalence (%) | 3.32                              | 3.06                                    | 2.88                        |
|                                 |                                         | 95%-CI         | [3.21,3.42]                       | [2.96,3.16]                             | [2.70,3.06]                 |
|                                 |                                         | N              | 128 315                           | 139 109                                 | 34 063                      |
|                                 | Father: Secondary or higher             | Prevalence (%) | 3.07                              | 2.86                                    | 2.95                        |
|                                 |                                         | 95%-CI         | [2.83,3.31]                       | [2.70,3.01]                             | [2.81,3.09]                 |
|                                 |                                         | N              | 27 689                            | 55 652                                  | 94 348                      |

The table presents unweighted predicted prevalences of severe wasting with 95% confidence intervals in square brackets below. All models include the depicted parental education levels and their interaction. Model 1 is adjusted for child age, sex and country-level fixed effects. Model 2 is further adjusted for birth order, whether the child was born in a multiple birth, maternal age and partnership status, urban location of household as well as its wealth quintile as measured by household asset ownership. Lastly, Model 3 includes all covariates and PSU-level fixed effects. All standard errors were clustered on the PSU-level.

**Table B7: Years of schooling and severe child undernutrition**

|                                                          | Model 1       |               |               | Model 2       |               |               | Model 3       |               |               |
|----------------------------------------------------------|---------------|---------------|---------------|---------------|---------------|---------------|---------------|---------------|---------------|
|                                                          | Stunting      | Underweight   | Wasting       | Stunting      | Underweight   | Wasting       | Stunting      | Underweight   | Wasting       |
| Maternal years of schooling                              | -0.90         | -0.43         | -0.08         | -0.55         | -0.28         | -0.05         | -0.34         | -0.20         | -0.05         |
|                                                          | [-0.92,-0.87] | [-0.45,-0.41] | [-0.09,-0.07] | [-0.57,-0.52] | [-0.30,-0.26] | [-0.07,-0.04] | [-0.37,-0.31] | [-0.22,-0.18] | [-0.06,-0.04] |
| Paternal years of schooling                              | -0.50         | -0.30         | -0.09         | -0.29         | -0.21         | -0.07         | -0.24         | -0.16         | -0.04         |
|                                                          | [-0.52,-0.47] | [-0.32,-0.29] | [-0.10,-0.08] | [-0.32,-0.27] | [-0.23,-0.19] | [-0.08,-0.06] | [-0.27,-0.22] | [-0.18,-0.14] | [-0.05,-0.03] |
| N                                                        | 948 642       | 977 862       | 938 208       | 948 642       | 977 862       | 938 208       | 948 642       | 977 862       | 938 208       |
| Paternal minus maternal school years                     | -0.06         | -0.07         | -0.04         | -0.03         | -0.05         | -0.03         | -0.06         | -0.05         | -0.01         |
|                                                          | [-0.08,-0.04] | [-0.09,-0.06] | [-0.05,-0.02] | [-0.05,-0.01] | [-0.07,-0.04] | [-0.04,-0.02] | [-0.08,-0.03] | [-0.06,-0.03] | [-0.02,0.00]  |
| N                                                        | 948 642       | 977 862       | 938 208       | 948 642       | 977 862       | 938 208       | 948 642       | 977 862       | 938 208       |
| Paternal divided by maternal school years                | -0.11         | 0.03          | 0.01          | 0.03          | 0.07          | 0.01          | -0.11         | 0.01          | 0.02          |
|                                                          | [-0.21,-0.01] | [-0.03,0.09]  | [-0.03,0.05]  | [-0.07,0.13]  | [0.01,0.13]   | [-0.03,0.05]  | [-0.23,0.01]  | [-0.06,0.08]  | [-0.03,0.07]  |
| N                                                        | 541 451       | 553 108       | 534 938       | 541 451       | 553 108       | 534 938       | 541 451       | 553 108       | 534 938       |
| Different number of school years                         | -3.08         | -2.81         | -0.93         | -2.21         | -2.39         | -0.84         | -1.25         | -1.31         | -0.38         |
|                                                          | [-3.28,-2.88] | [-2.96,-2.66] | [-1.02,-0.83] | [-2.41,-2.01] | [-2.54,-2.25] | [-0.93,-0.74] | [-1.47,-1.03] | [-1.47,-1.16] | [-0.49,-0.28] |
| Mother completed more years of schooling than the father | -1.62         | -0.60         | -0.06         | -1.17         | -0.42         | -0.04         | -0.27         | -0.16         | -0.07         |
|                                                          | [-1.82,-1.42] | [-0.72,-0.47] | [-0.15,0.03]  | [-1.37,-0.97] | [-0.55,-0.29] | [-0.13,0.05]  | [-0.50,-0.05] | [-0.30,-0.01] | [-0.17,0.03]  |
| N                                                        | 948 642       | 977 862       | 938 208       | 948 642       | 977 862       | 938 208       | 948 642       | 977 862       | 938 208       |

The table presents unweighted marginal effects in percentage points on different forms of severe child undernutrition with 95% confidence intervals in square brackets below. Model 1 is only adjusted for child age, sex and country-level fixed effects. Model 2 further controls for child birth order, whether the child was born in a multiple birth, maternal age and partnership status, urban location of household as well as its wealth quintile as measured by household asset ownership. Model 3 is additionally adjusted for local area characteristics (PSU-level fixed effects). All standard errors were clustered on the PSU-level. For each model type, different specifications were estimated, using either maternal and paternal years of schooling or the following composite indicators as exposure: “Paternal minus maternal school years”, “paternal divided by maternal school years”, or the two binary indicators “different number of school years” and “mother completed more years of schooling than the father”. With the exception of the main effects models (i.e. maternal and paternal years of schooling), all specifications control for the number of school years achieved by the least educated parent.

**Table B8: Relationship between parental education levels and stunting in children (2007-2014)**

|                                 |                                         |                | Mother: Non or incomplete primary | Mother: Primary or incomplete secondary | Mother: Secondary or higher |
|---------------------------------|-----------------------------------------|----------------|-----------------------------------|-----------------------------------------|-----------------------------|
| <b>Model 1</b><br>(N = 345 034) | Father: Non or incomplete primary       | Prevalence (%) | 41.88                             | 34.43                                   | 23.84                       |
|                                 |                                         | 95%-CI         | [41.48,42.27]                     | [33.75,35.11]                           | [22.46,25.21]               |
|                                 |                                         | N              | 120 889                           | 21 313                                  | 3 645                       |
|                                 | Father: Primary or incomplete secondary | Prevalence (%) | 37.19                             | 29.65                                   | 19.91                       |
|                                 |                                         | 95%-CI         | [36.66,37.73]                     | [29.19,30.11]                           | [19.30,20.52]               |
|                                 |                                         | N              | 42 228                            | 54 805                                  | 18 998                      |
|                                 | Father: Secondary or higher             | Prevalence (%) | 32.61                             | 24.75                                   | 17.88                       |
|                                 |                                         | 95%-CI         | [31.66,33.56]                     | [24.14,25.36]                           | [17.41,18.34]               |
|                                 |                                         | N              | 11 350                            | 24 442                                  | 47 364                      |
| <b>Model 2</b><br>(N = 345 034) | Father: Non or incomplete primary       | Prevalence (%) | 38.11                             | 33.46                                   | 26.89                       |
|                                 |                                         | 95%-CI         | [37.71,38.50]                     | [32.79,34.13]                           | [25.51,28.27]               |
|                                 |                                         | N              | 120 889                           | 21 313                                  | 3 645                       |
|                                 | Father: Primary or incomplete secondary | Prevalence (%) | 35.37                             | 30.44                                   | 25.33                       |
|                                 |                                         | 95%-CI         | [34.84,35.89]                     | [29.98,30.89]                           | [24.69,25.97]               |
|                                 |                                         | N              | 42 228                            | 54 805                                  | 18 998                      |
|                                 | Father: Secondary or higher             | Prevalence (%) | 32.91                             | 27.54                                   | 24.74                       |
|                                 |                                         | 95%-CI         | [31.97,33.85]                     | [26.92,28.15]                           | [24.22,25.26]               |
|                                 |                                         | N              | 11 350                            | 24 442                                  | 47 364                      |
| <b>Model 3</b><br>(N = 345 034) | Father: Non or incomplete primary       | Prevalence (%) | 35.74                             | 33.85                                   | 29.20                       |
|                                 |                                         | 95%-CI         | [35.39,36.10]                     | [33.14,34.55]                           | [27.73,30.67]               |
|                                 |                                         | N              | 120 889                           | 21 313                                  | 3 645                       |
|                                 | Father: Primary or incomplete secondary | Prevalence (%) | 34.36                             | 31.56                                   | 28.78                       |
|                                 |                                         | 95%-CI         | [33.85,34.88]                     | [31.11,32.01]                           | [28.07,29.48]               |
|                                 |                                         | N              | 42 228                            | 54 805                                  | 18 998                      |
|                                 | Father: Secondary or higher             | Prevalence (%) | 32.05                             | 29.48                                   | 27.83                       |
|                                 |                                         | 95%-CI         | [31.07,33.03]                     | [28.83,30.13]                           | [27.28,28.39]               |
|                                 |                                         | N              | 11 350                            | 24 442                                  | 47 364                      |

The table presents unweighted predicted prevalences of stunting with 95% confidence intervals in square brackets below using only surveys conducted between 2007 and 2014. All models include the depicted parental education levels and their interaction. Model 1 is adjusted for child age, sex and country-level fixed effects. Model 2 is further adjusted for birth order, whether the child was born in a multiple birth, maternal age and partnership status, urban location of household as well as its wealth quintile as measured by household asset ownership. Lastly, Model 3 includes all covariates and PSU-level fixed effects. All standard errors were clustered on the PSU-level.

**Table B9: Relationship between parental education levels and underweight in children (2007-2014)**

|                                 |                                         |                | Mother: Non or incomplete primary | Mother: Primary or incomplete secondary | Mother: Secondary or higher |
|---------------------------------|-----------------------------------------|----------------|-----------------------------------|-----------------------------------------|-----------------------------|
| <b>Model 1</b><br>(N = 351 382) | Father: Non or incomplete primary       | Prevalence (%) | 23.69                             | 17.17                                   | 13.02                       |
|                                 |                                         | 95%-CI         | [23.32,24.05]                     | [16.63,17.71]                           | [12.07,13.96]               |
|                                 |                                         | N              | 122 896                           | 21 563                                  | 3 761                       |
|                                 | Father: Primary or incomplete secondary | Prevalence (%) | 18.93                             | 13.64                                   | 11.01                       |
|                                 |                                         | 95%-CI         | [18.49,19.36]                     | [13.30,13.98]                           | [10.60,11.43]               |
|                                 |                                         | N              | 42 994                            | 55 544                                  | 19 289                      |
|                                 | Father: Secondary or higher             | Prevalence (%) | 16.01                             | 11.16                                   | 9.34                        |
|                                 |                                         | 95%-CI         | [15.24,16.78]                     | [10.71,11.60]                           | [8.98,9.69]                 |
|                                 |                                         | N              | 11 780                            | 25 013                                  | 48 542                      |
| <b>Model 2</b><br>(N = 351 382) | Father: Non or incomplete primary       | Prevalence (%) | 21.68                             | 16.64                                   | 14.63                       |
|                                 |                                         | 95%-CI         | [21.32,22.04]                     | [16.11,17.18]                           | [13.68,15.59]               |
|                                 |                                         | N              | 122 896                           | 21 563                                  | 3 761                       |
|                                 | Father: Primary or incomplete secondary | Prevalence (%) | 17.97                             | 14.03                                   | 13.92                       |
|                                 |                                         | 95%-CI         | [17.54,18.39]                     | [13.69,14.37]                           | [13.47,14.37]               |
|                                 |                                         | N              | 42 994                            | 55 544                                  | 19 289                      |
|                                 | Father: Secondary or higher             | Prevalence (%) | 16.21                             | 12.61                                   | 12.97                       |
|                                 |                                         | 95%-CI         | [15.44,16.98]                     | [12.16,13.07]                           | [12.58,13.37]               |
|                                 |                                         | N              | 11 780                            | 25 013                                  | 48 542                      |
| <b>Model 3</b><br>(N = 351 382) | Father: Non or incomplete primary       | Prevalence (%) | 19.32                             | 17.39                                   | 14.96                       |
|                                 |                                         | 95%-CI         | [19.03,19.61]                     | [16.82,17.96]                           | [13.95,15.97]               |
|                                 |                                         | N              | 122 896                           | 21 563                                  | 3 761                       |
|                                 | Father: Primary or incomplete secondary | Prevalence (%) | 17.90                             | 15.84                                   | 15.33                       |
|                                 |                                         | 95%-CI         | [17.48,18.32]                     | [15.49,16.18]                           | [14.85,15.81]               |
|                                 |                                         | N              | 42 994                            | 55 544                                  | 19 289                      |
|                                 | Father: Secondary or higher             | Prevalence (%) | 16.03                             | 15.18                                   | 14.73                       |
|                                 |                                         | 95%-CI         | [15.26,16.80]                     | [14.71,15.65]                           | [14.35,15.12]               |
|                                 |                                         | N              | 11 780                            | 25 013                                  | 48 542                      |

The table presents unweighted predicted prevalences of underweight with 95% confidence intervals in square brackets below using only surveys conducted between 2007 and 2014. All models include the depicted parental education levels and their interaction. Model 1 is adjusted for child age, sex and country-level fixed effects. Model 2 is further adjusted for birth order, whether the child was born in a multiple birth, maternal age and partnership status, urban location of household as well as its wealth quintile as measured by household asset ownership. Lastly, Model 3 includes all covariates and PSU-level fixed effects. All standard errors were clustered on the PSU-level.

**Table B10: Relationship between parental education levels and wasting in children (2007-2014)**

|                                 |                                         |                | Mother: Non or incomplete primary | Mother: Primary or incomplete secondary | Mother: Secondary or higher |
|---------------------------------|-----------------------------------------|----------------|-----------------------------------|-----------------------------------------|-----------------------------|
| <b>Model 1</b><br>(N = 337 827) | Father: Non or incomplete primary       | Prevalence (%) | 10.24                             | 8.26                                    | 7.45                        |
|                                 |                                         | 95%-CI         | [9.98,10.51]                      | [7.86,8.66]                             | [6.59,8.32]                 |
|                                 |                                         | N              | 117 196                           | 20 832                                  | 3 604                       |
|                                 | Father: Primary or incomplete secondary | Prevalence (%) | 8.39                              | 7.17                                    | 6.52                        |
|                                 |                                         | 95%-CI         | [8.09,8.69]                       | [6.92,7.41]                             | [6.18,6.86]                 |
|                                 |                                         | N              | 41 413                            | 53 841                                  | 18 812                      |
| Father: Secondary or higher     | Prevalence (%)                          | 7.68           | 6.48                              | 6.46                                    |                             |
|                                 | 95%-CI                                  | [7.11,8.24]    | [6.13,6.83]                       | [6.17,6.75]                             |                             |
|                                 | N                                       | 11 236         | 24 151                            | 46 742                                  |                             |
| <b>Model 2</b><br>(N = 337 827) | Father: Non or incomplete primary       | Prevalence (%) | 9.88                              | 8.18                                    | 7.74                        |
|                                 |                                         | 95%-CI         | [9.61,10.15]                      | [7.79,8.58]                             | [6.87,8.60]                 |
|                                 |                                         | N              | 117 196                           | 20 832                                  | 3 604                       |
|                                 | Father: Primary or incomplete secondary | Prevalence (%) | 8.23                              | 7.25                                    | 7.02                        |
|                                 |                                         | 95%-CI         | [7.93,8.53]                       | [7.00,7.49]                             | [6.65,7.38]                 |
|                                 |                                         | N              | 41 413                            | 53 841                                  | 18 812                      |
| Father: Secondary or higher     | Prevalence (%)                          | 7.72           | 6.74                              | 7.08                                    |                             |
|                                 | 95%-CI                                  | [7.16,8.28]    | [6.38,7.09]                       | [6.76,7.41]                             |                             |
|                                 | N                                       | 11 236         | 24 151                            | 46 742                                  |                             |
| <b>Model 3</b><br>(N = 337 827) | Father: Non or incomplete primary       | Prevalence (%) | 8.83                              | 8.45                                    | 7.28                        |
|                                 |                                         | 95%-CI         | [8.62,9.05]                       | [8.02,8.87]                             | [6.38,8.17]                 |
|                                 |                                         | N              | 117 196                           | 20 832                                  | 3 604                       |
|                                 | Father: Primary or incomplete secondary | Prevalence (%) | 8.46                              | 8.04                                    | 7.40                        |
|                                 |                                         | 95%-CI         | [8.16,8.77]                       | [7.79,8.29]                             | [7.02,7.79]                 |
|                                 |                                         | N              | 41 413                            | 53 841                                  | 18 812                      |
| Father: Secondary or higher     | Prevalence (%)                          | 8.06           | 7.81                              | 7.71                                    |                             |
|                                 | 95%-CI                                  | [7.47,8.64]    | [7.43,8.18]                       | [7.39,8.04]                             |                             |
|                                 | N                                       | 11 236         | 24 151                            | 46 742                                  |                             |

The table presents unweighted predicted prevalences of wasting with 95% confidence intervals in square brackets below using only surveys conducted between 2007 and 2014. All models include the depicted parental education levels and their interaction. Model 1 is adjusted for child age, sex and country-level fixed effects. Model 2 is further adjusted for birth order, whether the child was born in a multiple birth, maternal age and partnership status, urban location of household as well as its wealth quintile as measured by household asset ownership. Lastly, Model 3 includes all covariates and PSU-level fixed effects. All standard errors were clustered on the PSU-level.

**Table B11: Years of schooling and child undernutrition (2007-2014)**

|                                                          | Model 1       |               |               | Model 2       |               |               | Model 3       |               |               |
|----------------------------------------------------------|---------------|---------------|---------------|---------------|---------------|---------------|---------------|---------------|---------------|
|                                                          | Stunting      | Underweight   | Wasting       | Stunting      | Underweight   | Wasting       | Stunting      | Underweight   | Wasting       |
| Maternal years of schooling                              | -1.36         | -0.76         | -0.20         | -0.81         | -0.52         | -0.18         | -0.42         | -0.26         | -0.10         |
|                                                          | [-1.41,-1.30] | [-0.81,-0.72] | [-0.23,-0.17] | [-0.87,-0.76] | [-0.57,-0.47] | [-0.21,-0.14] | [-0.48,-0.36] | [-0.31,-0.21] | [-0.14,-0.07] |
| Paternal years of schooling                              | -0.62         | -0.53         | -0.18         | -0.34         | -0.39         | -0.16         | -0.29         | -0.20         | -0.04         |
|                                                          | [-0.67,-0.57] | [-0.57,-0.49] | [-0.21,-0.15] | [-0.39,-0.29] | [-0.43,-0.35] | [-0.19,-0.13] | [-0.34,-0.24] | [-0.24,-0.16] | [-0.07,-0.01] |
| N                                                        | 341 411       | 347 555       | 334 325       | 341 411       | 347 555       | 334 325       | 341 411       | 347 555       | 334 325       |
| Paternal minus maternal school years                     | 0.08          | -0.07         | -0.04         | 0.07          | -0.07         | -0.04         | -0.03         | -0.04         | 0.01          |
|                                                          | [0.04,0.13]   | [-0.10,-0.03] | [-0.07,-0.02] | [0.02,0.11]   | [-0.11,-0.04] | [-0.07,-0.02] | [-0.08,0.01]  | [-0.07,0.00]  | [-0.02,0.04]  |
| N                                                        | 341 411       | 347 555       | 334 325       | 341 411       | 347 555       | 334 325       | 341 411       | 347 555       | 334 325       |
| Paternal divided by maternal school years                | 0.03          | -0.03         | 0.01          | 0.20          | 0.03          | 0.01          | -0.20         | -0.12         | 0.04          |
|                                                          | [-0.18,0.24]  | [-0.19,0.12]  | [-0.09,0.11]  | [-0.01,0.41]  | [-0.12,0.18]  | [-0.09,0.11]  | [-0.44,0.05]  | [-0.31,0.06]  | [-0.09,0.16]  |
| N                                                        | 219 904       | 222 189       | 215 597       | 219 904       | 222 189       | 215 597       | 219 904       | 222 189       | 215 597       |
| Different number of school years                         | -2.28         | -3.81         | -1.91         | -1.26         | -3.28         | -1.83         | -0.80         | -1.05         | -0.47         |
|                                                          | [-2.70,-1.87] | [-4.16,-3.45] | [-2.18,-1.65] | [-1.67,-0.85] | [-3.63,-2.93] | [-2.10,-1.56] | [-1.25,-0.35] | [-1.42,-0.68] | [-0.75,-0.19] |
| Mother completed more years of schooling than the father | -2.72         | -0.84         | -0.08         | -1.72         | -0.40         | -0.03         | -0.11         | -0.12         | -0.22         |
|                                                          | [-3.15,-2.30] | [-1.15,-0.52] | [-0.31,0.16]  | [-2.14,-1.30] | [-0.72,-0.08] | [-0.27,0.20]  | [-0.57,0.36]  | [-0.48,0.24]  | [-0.49,0.05]  |
| N                                                        | 341 411       | 347 555       | 334 325       | 341 411       | 347 555       | 334 325       | 341 411       | 347 555       | 334 325       |

The table presents unweighted marginal effects in percentage points on different forms of child undernutrition with 95% confidence intervals in square brackets below using only survey conducted between 2007 and 2014. Model 1 is only adjusted for child age, sex and country-level fixed effects. Model 2 further controls for child birth order, whether the child was born in a multiple birth, maternal age and partnership status, urban location of household as well as its wealth quintile as measured by household asset ownership. Model 3 is additionally adjusted for local area characteristics (PSU-level fixed effects). All standard errors were clustered on the PSU-level. For each model type, different specifications were estimated, using either maternal and paternal years of schooling or the following composite indicators as exposure: "Paternal minus maternal school years", "paternal divided by maternal school years", or the two binary indicators "different number of school years" and "mother completed more years of schooling than the father". With the exception of the main effects models (i.e. maternal and paternal years of schooling), all specifications control for the number of school years achieved by the least educated parent.

**Table B12: Relationship between parental education levels and stunting in children (1999-2006)**

|                                 |                                         |                | Mother: Non or incomplete primary | Mother: Primary or incomplete secondary | Mother: Secondary or higher |
|---------------------------------|-----------------------------------------|----------------|-----------------------------------|-----------------------------------------|-----------------------------|
| <b>Model 1</b><br>(N = 359 405) | Father: Non or incomplete primary       | Prevalence (%) | 46.42                             | 36.09                                   | 28.79                       |
|                                 |                                         | 95%-CI         | [46.10,46.75]                     | [35.41,36.78]                           | [26.91,30.67]               |
|                                 |                                         | N              | 165 819                           | 21 535                                  | 2 016                       |
|                                 | Father: Primary or incomplete secondary | Prevalence (%) | 40.40                             | 31.23                                   | 22.63                       |
|                                 |                                         | 95%-CI         | [39.92,40.87]                     | [30.75,31.71]                           | [21.73,23.53]               |
|                                 |                                         | N              | 50 652                            | 48 712                                  | 9 384                       |
|                                 | Father: Secondary or higher             | Prevalence (%) | 36.24                             | 27.07                                   | 20.98                       |
|                                 |                                         | 95%-CI         | [35.27,37.21]                     | [26.39,27.75]                           | [20.40,21.57]               |
|                                 |                                         | N              | 10 600                            | 19 182                                  | 31 505                      |
| <b>Model 2</b><br>(N = 359 405) | Father: Non or incomplete primary       | Prevalence (%) | 42.68                             | 36.32                                   | 34.28                       |
|                                 |                                         | 95%-CI         | [42.35,43.01]                     | [35.65,36.99]                           | [32.40,36.16]               |
|                                 |                                         | N              | 165 819                           | 21 535                                  | 2 016                       |
|                                 | Father: Primary or incomplete secondary | Prevalence (%) | 39.49                             | 34.40                                   | 30.69                       |
|                                 |                                         | 95%-CI         | [39.03,39.96]                     | [33.92,34.88]                           | [29.78,31.60]               |
|                                 |                                         | N              | 50 652                            | 48 712                                  | 9 384                       |
|                                 | Father: Secondary or higher             | Prevalence (%) | 37.33                             | 32.39                                   | 30.73                       |
|                                 |                                         | 95%-CI         | [36.38,38.27]                     | [31.70,33.07]                           | [30.10,31.36]               |
|                                 |                                         | N              | 10 600                            | 19 182                                  | 31 505                      |
| <b>Model 3</b><br>(N = 359 405) | Father: Non or incomplete primary       | Prevalence (%) | 41.82                             | 37.93                                   | 34.70                       |
|                                 |                                         | 95%-CI         | [41.56,42.09]                     | [37.21,38.65]                           | [32.55,36.85]               |
|                                 |                                         | N              | 165 819                           | 21 535                                  | 2 016                       |
|                                 | Father: Primary or incomplete secondary | Prevalence (%) | 39.42                             | 35.68                                   | 32.55                       |
|                                 |                                         | 95%-CI         | [38.96,39.87]                     | [35.17,36.18]                           | [31.50,33.59]               |
|                                 |                                         | N              | 50 652                            | 48 712                                  | 9 384                       |
|                                 | Father: Secondary or higher             | Prevalence (%) | 36.85                             | 33.08                                   | 31.45                       |
|                                 |                                         | 95%-CI         | [35.83,37.87]                     | [32.35,33.82]                           | [30.74,32.16]               |
|                                 |                                         | N              | 10 600                            | 19 182                                  | 31 505                      |

The table presents unweighted predicted prevalences of stunting with 95% confidence intervals in square brackets below using only surveys conducted between 1999 and 2006. All models include the depicted parental education levels and their interaction. Model 1 is adjusted for child age, sex and country-level fixed effects. Model 2 is further adjusted for birth order, whether the child was born in a multiple birth, maternal age and partnership status, urban location of household as well as its wealth quintile as measured by household asset ownership. Lastly, Model 3 includes all covariates and PSU-level fixed effects. All standard errors were clustered on the PSU-level.



**Table B13: Relationship between parental education levels and underweight in children (1999-2006)**

|                                 |                                         |                | Mother: Non or incomplete primary | Mother: Primary or incomplete secondary | Mother: Secondary or higher |
|---------------------------------|-----------------------------------------|----------------|-----------------------------------|-----------------------------------------|-----------------------------|
| <b>Model 1</b><br>(N = 368 713) | Father: Non or incomplete primary       | Prevalence (%) | 28.64                             | 20.17                                   | 18.28                       |
|                                 |                                         | 95%-CI         | [28.36,28.92]                     | [19.62,20.72]                           | [17.08,19.49]               |
|                                 |                                         | N              | 170 696                           | 22 025                                  | 2 053                       |
|                                 | Father: Primary or incomplete secondary | Prevalence (%) | 23.13                             | 16.28                                   | 11.84                       |
|                                 |                                         | 95%-CI         | [22.73,23.53]                     | [15.89,16.66]                           | [11.17,12.51]               |
|                                 |                                         | N              | 51 920                            | 49 804                                  | 9 556                       |
|                                 | Father: Secondary or higher             | Prevalence (%) | 20.22                             | 13.69                                   | 11.47                       |
|                                 |                                         | 95%-CI         | [19.47,20.96]                     | [13.18,14.20]                           | [11.00,11.94]               |
|                                 |                                         | N              | 10 885                            | 19 593                                  | 32 181                      |
| <b>Model 2</b><br>(N = 368 713) | Father: Non or incomplete primary       | Prevalence (%) | 26.11                             | 20.40                                   | 21.84                       |
|                                 |                                         | 95%-CI         | [25.84,26.39]                     | [19.86,20.95]                           | [20.61,23.07]               |
|                                 |                                         | N              | 170 696                           | 22 025                                  | 2 053                       |
|                                 | Father: Primary or incomplete secondary | Prevalence (%) | 22.58                             | 18.48                                   | 17.17                       |
|                                 |                                         | 95%-CI         | [22.19,22.97]                     | [18.08,18.88]                           | [16.49,17.84]               |
|                                 |                                         | N              | 51 920                            | 49 804                                  | 9 556                       |
|                                 | Father: Secondary or higher             | Prevalence (%) | 21.02                             | 17.35                                   | 17.91                       |
|                                 |                                         | 95%-CI         | [20.28,21.76]                     | [16.82,17.87]                           | [17.41,18.41]               |
|                                 |                                         | N              | 10 885                            | 19 593                                  | 32 181                      |
| <b>Model 3</b><br>(N = 368 713) | Father: Non or incomplete primary       | Prevalence (%) | 25.45                             | 21.70                                   | 21.22                       |
|                                 |                                         | 95%-CI         | [25.21,25.68]                     | [21.12,22.29]                           | [19.86,22.58]               |
|                                 |                                         | N              | 170 696                           | 22 025                                  | 2 053                       |
|                                 | Father: Primary or incomplete secondary | Prevalence (%) | 23.14                             | 19.86                                   | 17.94                       |
|                                 |                                         | 95%-CI         | [22.76,23.53]                     | [19.44,20.28]                           | [17.16,18.73]               |
|                                 |                                         | N              | 51 920                            | 49 804                                  | 9 556                       |
|                                 | Father: Secondary or higher             | Prevalence (%) | 21.01                             | 17.70                                   | 17.10                       |
|                                 |                                         | 95%-CI         | [20.21,21.80]                     | [17.11,18.29]                           | [16.53,17.68]               |
|                                 |                                         | N              | 10 885                            | 19 593                                  | 32 181                      |

The table presents unweighted predicted prevalences of underweight with 95% confidence intervals in square brackets below using only surveys conducted between 1999 and 2006. All models include the depicted parental education levels and their interaction. Model 1 is adjusted for child age, sex and country-level fixed effects. Model 2 is further adjusted for birth order, whether the child was born in a multiple birth, maternal age and partnership status, urban location of household as well as its wealth quintile as measured by household asset ownership. Lastly, Model 3 includes all covariates and PSU-level fixed effects. All standard errors were clustered on the PSU-level.

**Table B14: Relationship between parental education levels and wasting in children (1999-2006)**

|                                 |                                         |                | Mother: Non or incomplete primary | Mother: Primary or incomplete secondary | Mother: Secondary or higher |
|---------------------------------|-----------------------------------------|----------------|-----------------------------------|-----------------------------------------|-----------------------------|
| <b>Model 1</b><br>(N = 357 592) | Father: Non or incomplete primary       | Prevalence (%) | 11.35                             | 8.62                                    | 8.53                        |
|                                 |                                         | 95%-CI         | [11.16,11.55]                     | [8.23,9.00]                             | [7.56,9.50]                 |
|                                 |                                         | N              | 165 191                           | 21 401                                  | 2 011                       |
|                                 | Father: Primary or incomplete secondary | Prevalence (%) | 9.52                              | 8.09                                    | 6.88                        |
|                                 |                                         | 95%-CI         | [9.24,9.79]                       | [7.81,8.37]                             | [6.36,7.40]                 |
|                                 |                                         | N              | 50 443                            | 48 380                                  | 9 295                       |
| Father: Secondary or higher     | Prevalence (%)                          | 8.46           | 7.06                              | 6.65                                    |                             |
|                                 | 95%-CI                                  | [7.93,8.99]    | [6.67,7.44]                       | [6.33,6.98]                             |                             |
|                                 | N                                       | 10 543         | 19 029                            | 31 299                                  |                             |
| <b>Model 2</b><br>(N = 357 592) | Father: Non or incomplete primary       | Prevalence (%) | 10.81                             | 8.72                                    | 9.22                        |
|                                 |                                         | 95%-CI         | [10.61,11.01]                     | [8.33,9.10]                             | [8.24,10.19]                |
|                                 |                                         | N              | 165 191                           | 21 401                                  | 2 011                       |
|                                 | Father: Primary or incomplete secondary | Prevalence (%) | 9.44                              | 8.59                                    | 7.92                        |
|                                 |                                         | 95%-CI         | [9.17,9.71]                       | [8.31,8.88]                             | [7.38,8.45]                 |
|                                 |                                         | N              | 50 443                            | 48 380                                  | 9 295                       |
| Father: Secondary or higher     | Prevalence (%)                          | 8.66           | 7.85                              | 7.90                                    |                             |
|                                 | 95%-CI                                  | [8.13,9.20]    | [7.46,8.24]                       | [7.53,8.26]                             |                             |
|                                 | N                                       | 10 543         | 19 029                            | 31 299                                  |                             |
| <b>Model 3</b><br>(N = 357 592) | Father: Non or incomplete primary       | Prevalence (%) | 10.56                             | 8.93                                    | 8.97                        |
|                                 |                                         | 95%-CI         | [10.39,10.73]                     | [8.52,9.34]                             | [7.86,10.09]                |
|                                 |                                         | N              | 165 191                           | 21 401                                  | 2 011                       |
|                                 | Father: Primary or incomplete secondary | Prevalence (%) | 9.67                              | 9.00                                    | 8.19                        |
|                                 |                                         | 95%-CI         | [9.39,9.96]                       | [8.70,9.31]                             | [7.57,8.82]                 |
|                                 |                                         | N              | 50 443                            | 48 380                                  | 9 295                       |
| Father: Secondary or higher     | Prevalence (%)                          | 8.81           | 8.00                              | 7.85                                    |                             |
|                                 | 95%-CI                                  | [8.20,9.42]    | [7.56,8.45]                       | [7.43,8.27]                             |                             |
|                                 | N                                       | 10 543         | 19 029                            | 31 299                                  |                             |

The table presents unweighted predicted prevalences of wasting with 95% confidence intervals in square brackets below using only surveys conducted between 1999 and 2006. All models include the depicted parental education levels and their interaction. Model 1 is adjusted for child age, sex and country-level fixed effects. Model 2 is further adjusted for birth order, whether the child was born in a multiple birth, maternal age and partnership status, urban location of household as well as its wealth quintile as measured by household asset ownership. Lastly, Model 3 includes all covariates and PSU-level fixed effects. All standard errors were clustered on the PSU-level.

**Table B15: Years of schooling and child undernutrition (1999-2006)**

|                                                          | Model 1       |               |               | Model 2       |               |               | Model 3       |               |               |
|----------------------------------------------------------|---------------|---------------|---------------|---------------|---------------|---------------|---------------|---------------|---------------|
|                                                          | Stunting      | Underweight   | Wasting       | Stunting      | Underweight   | Wasting       | Stunting      | Underweight   | Wasting       |
| Maternal years of schooling                              | -1.40         | -0.95         | -0.23         | -0.77         | -0.56         | -0.16         | -0.57         | -0.47         | -0.13         |
|                                                          | [-1.45,-1.35] | [-1.00,-0.91] | [-0.26,-0.20] | [-0.82,-0.71] | [-0.61,-0.51] | [-0.19,-0.12] | [-0.63,-0.50] | [-0.52,-0.41] | [-0.17,-0.09] |
| Paternal years of schooling                              | -0.76         | -0.63         | -0.20         | -0.40         | -0.40         | -0.15         | -0.38         | -0.35         | -0.12         |
|                                                          | [-0.81,-0.72] | [-0.67,-0.60] | [-0.23,-0.17] | [-0.45,-0.35] | [-0.44,-0.36] | [-0.18,-0.12] | [-0.43,-0.32] | [-0.40,-0.31] | [-0.16,-0.09] |
| N                                                        | 361 920       | 371 316       | 360 084       | 361 920       | 371 316       | 360 084       | 361 920       | 371 316       | 360 084       |
| Paternal minus maternal school years                     | -0.13         | -0.17         | -0.07         | -0.06         | -0.11         | -0.05         | -0.10         | -0.11         | -0.04         |
|                                                          | [-0.18,-0.09] | [-0.21,-0.13] | [-0.10,-0.04] | [-0.10,-0.01] | [-0.15,-0.07] | [-0.08,-0.03] | [-0.15,-0.05] | [-0.15,-0.07] | [-0.07,-0.01] |
| N                                                        | 361 920       | 371 316       | 360 084       | 361 920       | 371 316       | 360 084       | 361 920       | 371 316       | 360 084       |
| Paternal divided by maternal school years                | -0.64         | -0.21         | -0.04         | -0.28         | -0.02         | -0.01         | -0.50         | -0.23         | -0.10         |
|                                                          | [-0.86,-0.42] | [-0.38,-0.03] | [-0.15,0.08]  | [-0.49,-0.06] | [-0.20,0.15]  | [-0.12,0.11]  | [-0.76,-0.24] | [-0.44,-0.01] | [-0.24,0.04]  |
| N                                                        | 192 128       | 196 374       | 190 876       | 192 128       | 196 374       | 190 876       | 192 128       | 196 374       | 190 876       |
| Different number of school years                         | -3.32         | -4.28         | -1.75         | -1.88         | -3.27         | -1.48         | -1.39         | -1.85         | -0.82         |
|                                                          | [-3.72,-2.93] | [-4.62,-3.94] | [-1.99,-1.50] | [-2.28,-1.49] | [-3.60,-2.93] | [-1.72,-1.23] | [-1.83,-0.96] | [-2.22,-1.48] | [-1.10,-0.54] |
| Mother completed more years of schooling than the father | -1.69         | -1.06         | -0.37         | -1.04         | -0.71         | -0.33         | -0.16         | -0.18         | -0.20         |
|                                                          | [-2.14,-1.25] | [-1.42,-0.70] | [-0.62,-0.12] | [-1.47,-0.60] | [-1.06,-0.35] | [-0.58,-0.07] | [-0.65,0.33]  | [-0.58,0.21]  | [-0.49,0.09]  |
| N                                                        | 361 920       | 371 316       | 360 084       | 361 920       | 371 316       | 360 084       | 361 920       | 371 316       | 360 084       |

The table presents unweighted marginal effects in percentage points on different forms of child undernutrition with 95% confidence intervals in square brackets below using only survey conducted between 1999 and 2006. Model 1 is only adjusted for child age, sex and country-level fixed effects. Model 2 further controls for child birth order, whether the child was born in a multiple birth, maternal age and partnership status, urban location of household as well as its wealth quintile as measured by household asset ownership. Model 3 is additionally adjusted for local area characteristics (PSU-level fixed effects). All standard errors were clustered on the PSU-level. For each model type, different specifications were estimated, using either maternal and paternal years of schooling or the following composite indicators as exposure: "Paternal minus maternal school years", "paternal divided by maternal school years", or the two binary indicators "different number of school years" and "mother completed more years of schooling than the father". With the exception of the main effects models (i.e. maternal and paternal years of schooling), all specifications control for the number of school years achieved by the least educated parent.

**Table B16: Relationship between parental education levels and stunting in children (1990-1998)**

|                                 |                                         |                | Mother: Non or incomplete primary | Mother: Primary or incomplete secondary | Mother: Secondary or higher |
|---------------------------------|-----------------------------------------|----------------|-----------------------------------|-----------------------------------------|-----------------------------|
| <b>Model 1</b><br>(N = 246 248) | Father: Non or incomplete primary       | Prevalence (%) | 48.61                             | 38.32                                   | 26.89                       |
|                                 |                                         | 95%-CI         | [48.23,48.99]                     | [37.45,39.19]                           | [24.27,29.50]               |
|                                 |                                         | N              | 118 297                           | 13 364                                  | 975                         |
|                                 | Father: Primary or incomplete secondary | Prevalence (%) | 42.09                             | 31.29                                   | 20.79                       |
|                                 |                                         | 95%-CI         | [41.54,42.64]                     | [30.72,31.86]                           | [19.64,21.94]               |
|                                 |                                         | N              | 36 507                            | 36 736                                  | 5 865                       |
|                                 | Father: Secondary or higher             | Prevalence (%) | 37.93                             | 26.31                                   | 19.34                       |
|                                 |                                         | 95%-CI         | [36.67,39.20]                     | [25.46,27.15]                           | [18.59,20.09]               |
|                                 |                                         | N              | 5 925                             | 12 350                                  | 16 229                      |
| <b>Model 2</b><br>(N = 246 248) | Father: Non or incomplete primary       | Prevalence (%) | 44.98                             | 38.84                                   | 33.07                       |
|                                 |                                         | 95%-CI         | [44.60,45.36]                     | [37.99,39.68]                           | [30.46,35.67]               |
|                                 |                                         | N              | 118 297                           | 13 364                                  | 975                         |
|                                 | Father: Primary or incomplete secondary | Prevalence (%) | 41.66                             | 34.73                                   | 29.30                       |
|                                 |                                         | 95%-CI         | [41.12,42.19]                     | [34.15,35.30]                           | [28.14,30.46]               |
|                                 |                                         | N              | 36 507                            | 36 736                                  | 5 865                       |
|                                 | Father: Secondary or higher             | Prevalence (%) | 39.25                             | 32.33                                   | 30.00                       |
|                                 |                                         | 95%-CI         | [38.01,40.50]                     | [31.48,33.18]                           | [29.19,30.81]               |
|                                 |                                         | N              | 5 925                             | 12 350                                  | 16 229                      |
| <b>Model 3</b><br>(N = 246 248) | Father: Non or incomplete primary       | Prevalence (%) | 44.02                             | 40.15                                   | 34.95                       |
|                                 |                                         | 95%-CI         | [43.72,44.33]                     | [39.27,41.02]                           | [32.02,37.87]               |
|                                 |                                         | N              | 118 297                           | 13 364                                  | 975                         |
|                                 | Father: Primary or incomplete secondary | Prevalence (%) | 41.24                             | 35.90                                   | 33.03                       |
|                                 |                                         | 95%-CI         | [40.72,41.76]                     | [35.32,36.48]                           | [31.74,34.31]               |
|                                 |                                         | N              | 36 507                            | 36 736                                  | 5 865                       |
|                                 | Father: Secondary or higher             | Prevalence (%) | 39.03                             | 33.23                                   | 32.14                       |
|                                 |                                         | 95%-CI         | [37.68,40.38]                     | [32.30,34.16]                           | [31.23,33.05]               |
|                                 |                                         | N              | 5 925                             | 12 350                                  | 16 229                      |

The table presents unweighted predicted prevalences of stunting with 95% confidence intervals in square brackets below using only surveys conducted between 1990 and 1998. All models include the depicted parental education levels and their interaction. Model 1 is adjusted for child age, sex and country-level fixed effects. Model 2 is further adjusted for birth order, whether the child was born in a multiple birth, maternal age and partnership status, urban location of household as well as its wealth quintile as measured by household asset ownership. Lastly, Model 3 includes all covariates and PSU-level fixed effects. All standard errors were clustered on the PSU-level.

**Table B17: Relationship between parental education levels and underweight in children (1990-1998)**

|                                 |                                         |                | Mother: Non or incomplete primary | Mother: Primary or incomplete secondary | Mother: Secondary or higher |
|---------------------------------|-----------------------------------------|----------------|-----------------------------------|-----------------------------------------|-----------------------------|
| <b>Model 1</b><br>(N = 259 882) | Father: Non or incomplete primary       | Prevalence (%) | 29.11                             | 20.78                                   | 17.20                       |
|                                 |                                         | 95%-CI         | [28.78,29.43]                     | [20.11,21.45]                           | [15.70,18.71]               |
|                                 |                                         | N              | 126 009                           | 13 853                                  | 996                         |
|                                 | Father: Primary or incomplete secondary | Prevalence (%) | 23.18                             | 15.88                                   | 13.94                       |
|                                 |                                         | 95%-CI         | [22.72,23.64]                     | [15.43,16.34]                           | [13.27,14.61]               |
|                                 |                                         | N              | 38 780                            | 38 383                                  | 5 970                       |
|                                 | Father: Secondary or higher             | Prevalence (%) | 20.87                             | 13.37                                   | 13.62                       |
|                                 |                                         | 95%-CI         | [19.85,21.89]                     | [12.71,14.03]                           | [13.07,14.17]               |
|                                 |                                         | N              | 6 246                             | 12 986                                  | 16 659                      |
| <b>Model 2</b><br>(N = 259 882) | Father: Non or incomplete primary       | Prevalence (%) | 26.56                             | 21.21                                   | 21.28                       |
|                                 |                                         | 95%-CI         | [26.24,26.88]                     | [20.55,21.88]                           | [19.74,22.82]               |
|                                 |                                         | N              | 126 009                           | 13 853                                  | 996                         |
|                                 | Father: Primary or incomplete secondary | Prevalence (%) | 23.00                             | 18.44                                   | 19.76                       |
|                                 |                                         | 95%-CI         | [22.54,23.45]                     | [17.98,18.90]                           | [19.07,20.46]               |
|                                 |                                         | N              | 38 780                            | 38 383                                  | 5 970                       |
|                                 | Father: Secondary or higher             | Prevalence (%) | 21.97                             | 17.71                                   | 20.93                       |
|                                 |                                         | 95%-CI         | [20.96,22.97]                     | [17.06,18.37]                           | [20.33,21.52]               |
|                                 |                                         | N              | 6 246                             | 12 986                                  | 16 659                      |
| <b>Model 3</b><br>(N = 259 882) | Father: Non or incomplete primary       | Prevalence (%) | 26.36                             | 22.36                                   | 21.53                       |
|                                 |                                         | 95%-CI         | [26.09,26.62]                     | [21.65,23.07]                           | [19.74,23.31]               |
|                                 |                                         | N              | 126 009                           | 13 853                                  | 996                         |
|                                 | Father: Primary or incomplete secondary | Prevalence (%) | 23.40                             | 19.05                                   | 19.71                       |
|                                 |                                         | 95%-CI         | [22.95,23.84]                     | [18.56,19.54]                           | [18.93,20.49]               |
|                                 |                                         | N              | 38 780                            | 38 383                                  | 5 970                       |
|                                 | Father: Secondary or higher             | Prevalence (%) | 21.93                             | 17.63                                   | 19.23                       |
|                                 |                                         | 95%-CI         | [20.85,23.02]                     | [16.93,18.33]                           | [18.61,19.86]               |
|                                 |                                         | N              | 6 246                             | 12 986                                  | 16 659                      |

The table presents unweighted predicted prevalences of underweight with 95% confidence intervals in square brackets below using only surveys conducted between 1990 and 1998. All models include the depicted parental education levels and their interaction. Model 1 is adjusted for child age, sex and country-level fixed effects. Model 2 is further adjusted for birth order, whether the child was born in a multiple birth, maternal age and partnership status, urban location of household as well as its wealth quintile as measured by household asset ownership. Lastly, Model 3 includes all covariates and PSU-level fixed effects. All standard errors were clustered on the PSU-level.

**Table B18: Relationship between parental education levels and wasting in children (1990-1998)**

|                                |                                         |                | Mother: Non or incomplete primary | Mother: Primary or incomplete secondary | Mother: Secondary or higher |
|--------------------------------|-----------------------------------------|----------------|-----------------------------------|-----------------------------------------|-----------------------------|
| <b>Model 1</b><br>(N =244 706) | Father: Non or incomplete primary       | Prevalence (%) | 10.35                             | 7.97                                    | 8.05                        |
|                                |                                         | 95%-CI         | [10.14,10.56]                     | [7.53,8.41]                             | [6.91,9.19]                 |
|                                |                                         | N              | 117 754                           | 13 266                                  | 968                         |
|                                | Father: Primary or incomplete secondary | Prevalence (%) | 8.45                              | 6.94                                    | 6.66                        |
|                                |                                         | 95%-CI         | [8.14,8.76]                       | [6.66,7.22]                             | [6.20,7.11]                 |
|                                |                                         | N              | 36 238                            | 36 464                                  | 5 812                       |
| Father: Secondary or higher    | Prevalence (%)                          | 8.43           | 6.40                              | 7.19                                    |                             |
|                                | 95%-CI                                  | [7.70,9.15]    | [5.95,6.84]                       | [6.80,7.58]                             |                             |
|                                | N                                       | 5 874          | 12 259                            | 16 071                                  |                             |
| <b>Model 2</b><br>(N =244 706) | Father: Non or incomplete primary       | Prevalence (%) | 9.69                              | 8.12                                    | 8.93                        |
|                                |                                         | 95%-CI         | [9.48,9.90]                       | [7.68,8.56]                             | [7.78,10.08]                |
|                                |                                         | N              | 117 754                           | 13 266                                  | 968                         |
|                                | Father: Primary or incomplete secondary | Prevalence (%) | 8.45                              | 7.64                                    | 8.01                        |
|                                |                                         | 95%-CI         | [8.15,8.76]                       | [7.34,7.93]                             | [7.51,8.51]                 |
|                                |                                         | N              | 36 238                            | 36 464                                  | 5 812                       |
| Father: Secondary or higher    | Prevalence (%)                          | 8.75           | 7.48                              | 8.82                                    |                             |
|                                | 95%-CI                                  | [8.02,9.48]    | [7.02,7.94]                       | [8.38,9.27]                             |                             |
|                                | N                                       | 5 874          | 12 259                            | 16 071                                  |                             |
| <b>Model 3</b><br>(N =244 706) | Father: Non or incomplete primary       | Prevalence (%) | 9.69                              | 8.45                                    | 8.97                        |
|                                |                                         | 95%-CI         | [9.51,9.87]                       | [7.97,8.92]                             | [7.67,10.27]                |
|                                |                                         | N              | 117 754                           | 13 266                                  | 968                         |
|                                | Father: Primary or incomplete secondary | Prevalence (%) | 8.67                              | 7.79                                    | 7.73                        |
|                                |                                         | 95%-CI         | [8.36,8.98]                       | [7.48,8.10]                             | [7.17,8.29]                 |
|                                |                                         | N              | 36 238                            | 36 464                                  | 5 812                       |
| Father: Secondary or higher    | Prevalence (%)                          | 8.83           | 7.27                              | 7.94                                    |                             |
|                                | 95%-CI                                  | [8.01,9.65]    | [6.77,7.77]                       | [7.47,8.41]                             |                             |
|                                | N                                       | 5 874          | 12 259                            | 16 071                                  |                             |

The table presents unweighted predicted prevalences of wasting with 95% confidence intervals in square brackets below using only surveys conducted between 1990 and 1998. All models include the depicted parental education levels and their interaction. Model 1 is adjusted for child age, sex and country-level fixed effects. Model 2 is further adjusted for birth order, whether the child was born in a multiple birth, maternal age and partnership status, urban location of household as well as its wealth quintile as measured by household asset ownership. Lastly, Model 3 includes all covariates and PSU-level fixed effects. All standard errors were clustered on the PSU-level.

**Table B19: Years of schooling and child undernutrition (1990-1998)**

|                                                          | Model 1       |               |               | Model 2       |               |               | Model 3       |               |               |
|----------------------------------------------------------|---------------|---------------|---------------|---------------|---------------|---------------|---------------|---------------|---------------|
|                                                          | Stunting      | Underweight   | Wasting       | Stunting      | Underweight   | Wasting       | Stunting      | Underweight   | Wasting       |
| Maternal years of schooling                              | -1.62         | -0.96         | -0.22         | -0.93         | -0.54         | -0.13         | -0.70         | -0.52         | -0.14         |
|                                                          | [-1.69,-1.55] | [-1.02,-0.89] | [-0.26,-0.19] | [-1.01,-0.86] | [-0.60,-0.47] | [-0.17,-0.09] | [-0.78,-0.62] | [-0.59,-0.45] | [-0.19,-0.10] |
| Paternal years of schooling                              | -0.81         | -0.65         | -0.17         | -0.41         | -0.38         | -0.10         | -0.40         | -0.38         | -0.11         |
|                                                          | [-0.87,-0.75] | [-0.70,-0.60] | [-0.21,-0.14] | [-0.47,-0.35] | [-0.43,-0.33] | [-0.14,-0.07] | [-0.47,-0.34] | [-0.44,-0.33] | [-0.15,-0.06] |
| N                                                        | 243 751       | 257 306       | 242 213       | 243 751       | 257 306       | 242 213       | 243 751       | 257 306       | 242 213       |
| Paternal minus maternal school years                     | -0.14         | -0.22         | -0.06         | -0.04         | -0.13         | -0.04         | -0.09         | -0.14         | -0.04         |
|                                                          | [-0.20,-0.09] | [-0.26,-0.17] | [-0.09,-0.03] | [-0.09,0.02]  | [-0.17,-0.08] | [-0.07,-0.00] | [-0.15,-0.03] | [-0.18,-0.09] | [-0.07,-0.00] |
| N                                                        | 243 751       | 257 306       | 242 213       | 243 751       | 257 306       | 242 213       | 243 751       | 257 306       | 242 213       |
| Paternal divided by maternal school years                | -0.29         | -0.15         | 0.06          | 0.21          | 0.11          | 0.09          | -0.06         | -0.01         | 0.01          |
|                                                          | [-0.56,-0.02] | [-0.35,0.06]  | [-0.07,0.19]  | [-0.06,0.47]  | [-0.10,0.31]  | [-0.03,0.22]  | [-0.37,0.26]  | [-0.25,0.24]  | [-0.14,0.17]  |
| N                                                        | 127 528       | 132 563       | 126 515       | 127 528       | 132 563       | 126 515       | 127 528       | 132 563       | 126 515       |
| Different number of school years                         | -3.26         | -4.03         | -1.48         | -1.53         | -2.79         | -1.13         | -1.57         | -1.87         | -0.69         |
|                                                          | [-3.73,-2.79] | [-4.43,-3.63] | [-1.75,-1.20] | [-2.00,-1.06] | [-3.19,-2.39] | [-1.41,-0.85] | [-2.07,-1.06] | [-2.31,-1.44] | [-1.01,-0.37] |
| Mother completed more years of schooling than the father | -2.45         | -0.77         | -0.26         | -1.83         | -0.50         | -0.21         | -0.72         | -0.00         | -0.06         |
|                                                          | [-3.01,-1.90] | [-1.21,-0.34] | [-0.55,0.03]  | [-2.38,-1.29] | [-0.93,-0.07] | [-0.51,0.08]  | [-1.31,-0.12] | [-0.48,0.47]  | [-0.38,0.27]  |
| N                                                        | 243 751       | 257 306       | 242 213       | 243 751       | 257 306       | 242 213       | 243 751       | 257 306       | 242 213       |

The table presents unweighted marginal effects in percentage points on different forms of child undernutrition with 95% confidence intervals in square brackets below using only survey conducted between 1990 and 1998. Model 1 is only adjusted for child age, sex and country-level fixed effects. Model 2 further controls for child birth order, whether the child was born in a multiple birth, maternal age and partnership status, urban location of household as well as its wealth quintile as measured by household asset ownership. Model 3 is additionally adjusted for local area characteristics (PSU-level fixed effects). All standard errors were clustered on the PSU-level. For each model type, different specifications were estimated, using either maternal and paternal years of schooling or the following composite indicators as exposure: "Paternal minus maternal school years", "paternal divided by maternal school years", or the two binary indicators "different number of school years" and "mother completed more years of schooling than the father". With the exception of the main effects models (i.e. maternal and paternal years of schooling), all specifications control for the number of school years achieved by the least educated parent.

**Table B20: Relationship between parental education levels and stunting in children (latest surveys)**

|                                 |                                         |                | Mother: Non or incomplete primary | Mother: Primary or incomplete secondary | Mother: Secondary or higher |
|---------------------------------|-----------------------------------------|----------------|-----------------------------------|-----------------------------------------|-----------------------------|
| <b>Model 1</b><br>(N = 320 471) | Father: Non or incomplete primary       | Prevalence (%) | 43.44                             | 35.81                                   | 23.83                       |
|                                 |                                         | 95%-CI         | [43.05,43.83]                     | [35.12,36.50]                           | [22.07,25.59]               |
|                                 |                                         | N              | 119 886                           | 21 163                                  | 2 287                       |
|                                 | Father: Primary or incomplete secondary | Prevalence (%) | 37.88                             | 29.32                                   | 21.17                       |
|                                 |                                         | 95%-CI         | [37.35,38.41]                     | [28.88,29.75]                           | [20.47,21.87]               |
|                                 |                                         | N              | 42 337                            | 57 888                                  | 15 269                      |
|                                 | Father: Secondary or higher             | Prevalence (%) | 32.72                             | 24.37                                   | 17.80                       |
|                                 |                                         | 95%-CI         | [31.61,33.82]                     | [23.70,25.03]                           | [17.26,18.34]               |
|                                 |                                         | N              | 8 121                             | 19 631                                  | 33 889                      |
| <b>Model 2</b><br>(N = 320 471) | Father: Non or incomplete primary       | Prevalence (%) | 39.71                             | 35.12                                   | 27.62                       |
|                                 |                                         | 95%-CI         | [39.32,40.10]                     | [34.44,35.81]                           | [25.86,29.38]               |
|                                 |                                         | N              | 119 886                           | 21 163                                  | 2 287                       |
|                                 | Father: Primary or incomplete secondary | Prevalence (%) | 36.27                             | 30.86                                   | 27.29                       |
|                                 |                                         | 95%-CI         | [35.75,36.79]                     | [30.42,31.30]                           | [26.57,28.02]               |
|                                 |                                         | N              | 42 337                            | 57 888                                  | 15 269                      |
|                                 | Father: Secondary or higher             | Prevalence (%) | 33.45                             | 27.95                                   | 25.54                       |
|                                 |                                         | 95%-CI         | [32.36,34.54]                     | [27.27,28.62]                           | [24.94,26.13]               |
|                                 |                                         | N              | 8 121                             | 19 631                                  | 33 889                      |
| <b>Model 3</b><br>(N = 320 471) | Father: Non or incomplete primary       | Prevalence (%) | 37.58                             | 35.90                                   | 29.66                       |
|                                 |                                         | 95%-CI         | [37.23,37.93]                     | [35.18,36.62]                           | [27.76,31.56]               |
|                                 |                                         | N              | 119 886                           | 21 163                                  | 2 287                       |
|                                 | Father: Primary or incomplete secondary | Prevalence (%) | 35.62                             | 32.32                                   | 30.02                       |
|                                 |                                         | 95%-CI         | [35.11,36.13]                     | [31.88,32.77]                           | [29.21,30.84]               |
|                                 |                                         | N              | 42 337                            | 57 888                                  | 15 269                      |
|                                 | Father: Secondary or higher             | Prevalence (%) | 32.96                             | 30.14                                   | 28.38                       |
|                                 |                                         | 95%-CI         | [31.81,34.12]                     | [29.41,30.87]                           | [27.73,29.04]               |
|                                 |                                         | N              | 8 121                             | 19 631                                  | 33 889                      |

The table presents unweighted predicted prevalences of stunting with 95% confidence intervals in square brackets below using only the latest survey per country. All models include the depicted parental education levels and their interaction. Model 1 is adjusted for child age, sex and country-level fixed effects. Model 2 is further adjusted for birth order, whether the child was born in a multiple birth, maternal age and partnership status, urban location of household as well as its wealth quintile as measured by household asset ownership. Lastly, Model 3 includes all covariates and PSU-level fixed effects. All standard errors were clustered on the PSU-level.



**Table B21: Relationship between parental education levels and underweight in children (latest surveys)**

|                                 |                                         |                | Mother: Non or incomplete primary | Mother: Primary or incomplete secondary | Mother: Secondary or higher |
|---------------------------------|-----------------------------------------|----------------|-----------------------------------|-----------------------------------------|-----------------------------|
| <b>Model 1</b><br>(N = 329 278) | Father: Non or incomplete primary       | Prevalence (%) | 27.20                             | 20.01                                   | 14.92                       |
|                                 |                                         | 95%-CI         | [26.85,27.55]                     | [19.45,20.58]                           | [13.66,16.18]               |
|                                 |                                         | N              | 123 024                           | 22 117                                  | 2 387                       |
|                                 | Father: Primary or incomplete secondary | Prevalence (%) | 22.27                             | 15.76                                   | 11.62                       |
|                                 |                                         | 95%-CI         | [21.83,22.72]                     | [15.41,16.12]                           | [11.09,12.15]               |
|                                 |                                         | N              | 43 276                            | 59 526                                  | 15 697                      |
|                                 | Father: Secondary or higher             | Prevalence (%) | 18.63                             | 13.11                                   | 9.79                        |
|                                 |                                         | 95%-CI         | [17.68,19.58]                     | [12.59,13.64]                           | [9.34,10.25]                |
|                                 |                                         | N              | 8 363                             | 20 093                                  | 34 795                      |
| <b>Model 2</b><br>(N = 329 278) | Father: Non or incomplete primary       | Prevalence (%) | 24.80                             | 19.60                                   | 17.31                       |
|                                 |                                         | 95%-CI         | [24.44,25.16]                     | [19.04,20.15]                           | [16.03,18.58]               |
|                                 |                                         | N              | 123 024                           | 22 117                                  | 2 387                       |
|                                 | Father: Primary or incomplete secondary | Prevalence (%) | 21.28                             | 16.80                                   | 15.53                       |
|                                 |                                         | 95%-CI         | [20.84,21.72]                     | [16.44,17.16]                           | [14.97,16.09]               |
|                                 |                                         | N              | 43 276                            | 59 526                                  | 15 697                      |
|                                 | Father: Secondary or higher             | Prevalence (%) | 19.13                             | 15.41                                   | 14.62                       |
|                                 |                                         | 95%-CI         | [18.19,20.08]                     | [14.87,15.95]                           | [14.12,15.12]               |
|                                 |                                         | N              | 8 363                             | 20 093                                  | 34 795                      |
| <b>Model 3</b><br>(N = 329 278) | Father: Non or incomplete primary       | Prevalence (%) | 22.90                             | 20.42                                   | 17.59                       |
|                                 |                                         | 95%-CI         | [22.60,23.20]                     | [19.82,21.01]                           | [16.25,18.93]               |
|                                 |                                         | N              | 123 024                           | 22 117                                  | 2 387                       |
|                                 | Father: Primary or incomplete secondary | Prevalence (%) | 21.17                             | 18.39                                   | 17.13                       |
|                                 |                                         | 95%-CI         | [20.73,21.60]                     | [18.03,18.75]                           | [16.52,17.75]               |
|                                 |                                         | N              | 43 276                            | 59 526                                  | 15 697                      |
|                                 | Father: Secondary or higher             | Prevalence (%) | 18.81                             | 17.49                                   | 16.37                       |
|                                 |                                         | 95%-CI         | [17.85,19.77]                     | [16.91,18.06]                           | [15.87,16.87]               |
|                                 |                                         | N              | 8 363                             | 20 093                                  | 34 795                      |

The table presents unweighted predicted prevalences of underweight with 95% confidence intervals in square brackets below using only the latest survey per country. All models include the depicted parental education levels and their interaction. Model 1 is adjusted for child age, sex and country-level fixed effects. Model 2 is further adjusted for birth order, whether the child was born in a multiple birth, maternal age and partnership status, urban location of household as well as its wealth quintile as measured by household asset ownership. Lastly, Model 3 includes all covariates and PSU-level fixed effects. All standard errors were clustered on the PSU-level.

**Table B22: Relationship between parental education levels and wasting in children (latest surveys)**

|                                 |                                         |                | Mother: Non or incomplete primary | Mother: Primary or incomplete secondary | Mother: Secondary or higher |
|---------------------------------|-----------------------------------------|----------------|-----------------------------------|-----------------------------------------|-----------------------------|
| <b>Model 1</b><br>(N = 317 267) | Father: Non or incomplete primary       | Prevalence (%) | 11.84                             | 9.42                                    | 8.68                        |
|                                 |                                         | 95%-CI         | [11.58,12.11]                     | [9.00,9.84]                             | [7.49,9.88]                 |
|                                 |                                         | N              | 117 933                           | 21 346                                  | 2 275                       |
|                                 | Father: Primary or incomplete secondary | Prevalence (%) | 9.93                              | 8.40                                    | 7.24                        |
|                                 |                                         | 95%-CI         | [9.61,10.25]                      | [8.14,8.66]                             | [6.81,7.66]                 |
|                                 |                                         | N              | 41 787                            | 57 742                                  | 15 251                      |
|                                 | Father: Secondary or higher             | Prevalence (%) | 9.42                              | 7.55                                    | 7.18                        |
|                                 |                                         | 95%-CI         | [8.71,10.13]                      | [7.14,7.96]                             | [6.80,7.56]                 |
|                                 |                                         | N              | 8 000                             | 19 402                                  | 33 531                      |
| <b>Model 2</b><br>(N = 317 267) | Father: Non or incomplete primary       | Prevalence (%) | 11.32                             | 9.35                                    | 9.18                        |
|                                 |                                         | 95%-CI         | [11.05,11.59]                     | [8.93,9.77]                             | [7.98,10.37]                |
|                                 |                                         | N              | 117 933                           | 21 346                                  | 2 275                       |
|                                 | Father: Primary or incomplete secondary | Prevalence (%) | 9.74                              | 8.64                                    | 8.04                        |
|                                 |                                         | 95%-CI         | [9.42,10.06]                      | [8.37,8.91]                             | [7.59,8.50]                 |
|                                 |                                         | N              | 41 787                            | 57 742                                  | 15 251                      |
|                                 | Father: Secondary or higher             | Prevalence (%) | 9.53                              | 8.04                                    | 8.16                        |
|                                 |                                         | 95%-CI         | [8.82,10.24]                      | [7.62,8.47]                             | [7.75,8.58]                 |
|                                 |                                         | N              | 8 000                             | 19 402                                  | 33 531                      |
| <b>Model 3</b><br>(N = 317 267) | Father: Non or incomplete primary       | Prevalence (%) | 10.48                             | 9.63                                    | 8.45                        |
|                                 |                                         | 95%-CI         | [10.25,10.70]                     | [9.19,10.07]                            | [7.25,9.65]                 |
|                                 |                                         | N              | 117 933                           | 21 346                                  | 2 275                       |
|                                 | Father: Primary or incomplete secondary | Prevalence (%) | 9.88                              | 9.40                                    | 8.66                        |
|                                 |                                         | 95%-CI         | [9.56,10.20]                      | [9.13,9.67]                             | [8.16,9.16]                 |
|                                 |                                         | N              | 41 787                            | 57 742                                  | 15 251                      |
|                                 | Father: Secondary or higher             | Prevalence (%) | 9.61                              | 8.88                                    | 8.74                        |
|                                 |                                         | 95%-CI         | [8.86,10.35]                      | [8.41,9.34]                             | [8.31,9.17]                 |
|                                 |                                         | N              | 8 000                             | 19 402                                  | 33 531                      |

The table presents unweighted predicted prevalences of wasting with 95% confidence intervals in square brackets below using only the latest survey per country. All models include the depicted parental education levels and their interaction. Model 1 is adjusted for child age, sex and country-level fixed effects. Model 2 is further adjusted for birth order, whether the child was born in a multiple birth, maternal age and partnership status, urban location of household as well as its wealth quintile as measured by household asset ownership. Lastly, Model 3 includes all covariates and PSU-level fixed effects. All standard errors were clustered on the PSU-level.

**Table B23: Years of schooling and child undernutrition (latest surveys)**

|                                                          | Model 1       |               |               | Model 2       |               |               | Model 3       |               |               |
|----------------------------------------------------------|---------------|---------------|---------------|---------------|---------------|---------------|---------------|---------------|---------------|
|                                                          | Stunting      | Underweight   | Wasting       | Stunting      | Underweight   | Wasting       | Stunting      | Underweight   | Wasting       |
| Maternal years of schooling                              | -1.34         | -0.95         | -0.27         | -0.80         | -0.65         | -0.22         | -0.44         | -0.38         | -0.14         |
|                                                          | [-1.39,-1.28] | [-1.00,-0.91] | [-0.30,-0.23] | [-0.86,-0.74] | [-0.70,-0.60] | [-0.26,-0.18] | [-0.51,-0.38] | [-0.43,-0.32] | [-0.18,-0.09] |
| Paternal years of schooling                              | -0.72         | -0.56         | -0.18         | -0.44         | -0.39         | -0.15         | -0.38         | -0.26         | -0.06         |
|                                                          | [-0.77,-0.68] | [-0.60,-0.52] | [-0.21,-0.15] | [-0.49,-0.39] | [-0.43,-0.35] | [-0.18,-0.12] | [-0.43,-0.32] | [-0.31,-0.22] | [-0.10,-0.03] |
| N                                                        | 317 393       | 325 966       | 314 250       | 317 393       | 325 966       | 314 250       | 317 393       | 325 966       | 314 250       |
| Paternal minus maternal school years                     | -0.04         | -0.06         | -0.03         | -0.03         | -0.04         | -0.03         | -0.10         | -0.05         | 0.00          |
|                                                          | [-0.09,0.01]  | [-0.10,-0.02] | [-0.06,-0.00] | [-0.07,0.02]  | [-0.08,-0.00] | [-0.06,0.00]  | [-0.15,-0.05] | [-0.09,-0.01] | [-0.03,0.04]  |
| N                                                        | 317 393       | 325 966       | 314 250       | 317 393       | 325 966       | 314 250       | 317 393       | 325 966       | 314 250       |
| Paternal divided by maternal school years                | -0.36         | -0.11         | 0.02          | -0.15         | 0.00          | 0.03          | -0.40         | -0.17         | -0.00         |
|                                                          | [-0.59,-0.13] | [-0.28,0.06]  | [-0.10,0.14]  | [-0.37,0.08]  | [-0.17,0.18]  | [-0.09,0.15]  | [-0.67,-0.13] | [-0.38,0.04]  | [-0.15,0.15]  |
| N                                                        | 193 076       | 197 501       | 191 589       | 193 076       | 197 501       | 191 589       | 193 076       | 197 501       | 191 589       |
| Different number of school years                         | -3.08         | -3.73         | -1.84         | -2.06         | -3.07         | -1.69         | -1.15         | -1.34         | -0.62         |
|                                                          | [-3.51,-2.66] | [-4.10,-3.36] | [-2.12,-1.56] | [-2.48,-1.64] | [-3.44,-2.70] | [-1.97,-1.41] | [-1.61,-0.68] | [-1.74,-0.95] | [-0.93,-0.31] |
| Mother completed more years of schooling than the father | -1.63         | -1.35         | -0.32         | -0.87         | -0.94         | -0.26         | 0.42          | -0.24         | -0.24         |
|                                                          | [-2.08,-1.18] | [-1.71,-0.99] | [-0.58,-0.05] | [-1.31,-0.42] | [-1.30,-0.58] | [-0.53,0.01]  | [-0.08,0.92]  | [-0.64,0.17]  | [-0.54,0.06]  |
| N                                                        | 317 393       | 325 966       | 314 250       | 317 393       | 325 966       | 314 250       | 317 393       | 325 966       | 314 250       |

The table presents unweighted marginal effects in percentage points on different forms of child undernutrition with 95% confidence intervals in square brackets below using only the latest survey per country. Model 1 is only adjusted for child age, sex and country-level fixed effects. Model 2 further controls for child birth order, whether the child was born in a multiple birth, maternal age and partnership status, urban location of household as well as its wealth quintile as measured by household asset ownership. Model 3 is additionally adjusted for local area characteristics (PSU-level fixed effects). All standard errors were clustered on the PSU-level. For each model type, different specifications were estimated, using either maternal and paternal years of schooling or the following composite indicators as exposure: “Paternal minus maternal school years”, “paternal divided by maternal school years”, or the two binary indicators “different number of school years” and “mother completed more years of schooling than the father”. With the exception of the main effects models (i.e. maternal and paternal years of schooling), all specifications control for the number of school years achieved by the least educated parent.

**Table B24: Relationship between parental education levels and stunting in children (adjusted for maternal height)**

|                                 |                                         |                | Mother: Non or incomplete primary | Mother: Primary or incomplete secondary | Mother: Secondary or higher |
|---------------------------------|-----------------------------------------|----------------|-----------------------------------|-----------------------------------------|-----------------------------|
| <b>Model 1</b><br>(N = 866 457) | Father: Non or incomplete primary       | Prevalence (%) | 45.74                             | 36.22                                   | 25.57                       |
|                                 |                                         | 95%-CI         | [45.51,45.97]                     | [35.77,36.67]                           | [24.42,26.71]               |
|                                 |                                         | N              | 367 834                           | 51 025                                  | 5 672                       |
|                                 | Father: Primary or incomplete secondary | Prevalence (%) | 39.77                             | 30.85                                   | 20.56                       |
|                                 |                                         | 95%-CI         | [39.45,40.09]                     | [30.55,31.15]                           | [20.08,21.05]               |
|                                 |                                         | N              | 116 632                           | 128 533                                 | 31 570                      |
| Father: Secondary or higher     | Prevalence (%)                          | 34.80          | 26.00                             | 19.16                                   |                             |
|                                 | 95%-CI                                  | [34.17,35.43]  | [25.58,26.42]                     | [18.82,19.51]                           |                             |
|                                 | N                                       | 25 510         | 51 140                            | 88 541                                  |                             |
| <b>Model 2</b><br>(N = 866 457) | Father: Non or incomplete primary       | Prevalence (%) | 41.09                             | 36.14                                   | 31.06                       |
|                                 |                                         | 95%-CI         | [40.87,41.31]                     | [35.71,36.56]                           | [29.93,32.20]               |
|                                 |                                         | N              | 367 834                           | 51 025                                  | 5 672                       |
|                                 | Father: Primary or incomplete secondary | Prevalence (%) | 38.17                             | 33.59                                   | 29.51                       |
|                                 |                                         | 95%-CI         | [37.86,38.47]                     | [33.30,33.88]                           | [29.02,30.00]               |
|                                 |                                         | N              | 116 632                           | 128 533                                 | 31 570                      |
| Father: Secondary or higher     | Prevalence (%)                          | 35.75          | 31.40                             | 29.75                                   |                             |
|                                 | 95%-CI                                  | [35.14,36.36]  | [30.98,31.82]                     | [29.38,30.12]                           |                             |
|                                 | N                                       | 25 510         | 51 140                            | 88 541                                  |                             |
| <b>Model 3</b><br>(N = 866 457) | Father: Non or incomplete primary       | Prevalence (%) | 39.60                             | 37.24                                   | 33.04                       |
|                                 |                                         | 95%-CI         | [39.41,39.79]                     | [36.79,37.70]                           | [31.80,34.28]               |
|                                 |                                         | N              | 367 834                           | 51 025                                  | 5 672                       |
|                                 | Father: Primary or incomplete secondary | Prevalence (%) | 37.77                             | 34.91                                   | 32.58                       |
|                                 |                                         | 95%-CI         | [37.47,38.06]                     | [34.61,35.21]                           | [32.02,33.14]               |
|                                 |                                         | N              | 116 632                           | 128 533                                 | 31 570                      |
| Father: Secondary or higher     | Prevalence (%)                          | 35.54          | 32.92                             | 31.88                                   |                             |
|                                 | 95%-CI                                  | [34.90,36.19]  | [32.47,33.38]                     | [31.46,32.29]                           |                             |
|                                 | N                                       | 25 510         | 51 140                            | 88 541                                  |                             |

The table presents unweighted predicted prevalences of stunting with 95% confidence intervals in square brackets. All models include the depicted parental education levels and their interaction. Model 1 is adjusted for child age, sex and country-level fixed effects. Model 2 is further adjusted for birth order, whether the child was born in a multiple birth, maternal age, height and partnership status, urban location of household as well as its wealth quintile as measured by household asset ownership. Lastly, Model 3 includes all covariates and PSU-level fixed effects. All standard errors were clustered on the PSU-level.

**Table B25: Relationship between parental education levels and underweight in children (adjusted for maternal height)**

|                                 |                                         |                | Mother: Non or incomplete primary | Mother: Primary or incomplete secondary | Mother: Secondary or higher |
|---------------------------------|-----------------------------------------|----------------|-----------------------------------|-----------------------------------------|-----------------------------|
| <b>Model 1</b><br>(N = 885 836) | Father: Non or incomplete primary       | Prevalence (%) | 26.39                             | 18.53                                   | 15.12                       |
|                                 |                                         | 95%-CI         | [26.19,26.58]                     | [18.17,18.88]                           | [14.37,15.88]               |
|                                 |                                         | N              | 376 789                           | 51 925                                  | 5 832                       |
|                                 | Father: Primary or incomplete secondary | Prevalence (%) | 20.94                             | 14.89                                   | 11.64                       |
|                                 |                                         | 95%-CI         | [20.68,21.21]                     | [14.66,15.11]                           | [11.31,11.97]               |
|                                 |                                         | N              | 119 170                           | 130 935                                 | 32 090                      |
|                                 | Father: Secondary or higher             | Prevalence (%) | 17.97                             | 12.40                                   | 10.72                       |
|                                 |                                         | 95%-CI         | [17.48,18.47]                     | [12.09,12.70]                           | [10.46,10.99]               |
|                                 |                                         | N              | 26 293                            | 52 277                                  | 90 525                      |
| <b>Model 2</b><br>(N = 885 836) | Father: Non or incomplete primary       | Prevalence (%) | 23.59                             | 18.51                                   | 18.26                       |
|                                 |                                         | 95%-CI         | [23.39,23.78]                     | [18.17,18.86]                           | [17.50,19.03]               |
|                                 |                                         | N              | 376 789                           | 51 925                                  | 5 832                       |
|                                 | Father: Primary or incomplete secondary | Prevalence (%) | 20.06                             | 16.59                                   | 16.91                       |
|                                 |                                         | 95%-CI         | [19.80,20.31]                     | [16.36,16.82]                           | [16.56,17.26]               |
|                                 |                                         | N              | 119 170                           | 130 935                                 | 32 090                      |
|                                 | Father: Secondary or higher             | Prevalence (%) | 18.64                             | 15.69                                   | 16.92                       |
|                                 |                                         | 95%-CI         | [18.15,19.13]                     | [15.37,16.00]                           | [16.64,17.21]               |
|                                 |                                         | N              | 26 293                            | 52 277                                  | 90 525                      |
| <b>Model 3</b><br>(N = 885 836) | Father: Non or incomplete primary       | Prevalence (%) | 22.39                             | 19.73                                   | 18.37                       |
|                                 |                                         | 95%-CI         | [22.23,22.55]                     | [19.36,20.10]                           | [17.55,19.18]               |
|                                 |                                         | N              | 376 789                           | 51 925                                  | 5 832                       |
|                                 | Father: Primary or incomplete secondary | Prevalence (%) | 20.53                             | 18.16                                   | 17.75                       |
|                                 |                                         | 95%-CI         | [20.28,20.78]                     | [17.92,18.40]                           | [17.36,18.14]               |
|                                 |                                         | N              | 119 170                           | 130 935                                 | 32 090                      |
|                                 | Father: Secondary or higher             | Prevalence (%) | 18.82                             | 17.08                                   | 17.16                       |
|                                 |                                         | 95%-CI         | [18.31,19.32]                     | [16.74,17.42]                           | [16.85,17.48]               |
|                                 |                                         | N              | 26 293                            | 52 277                                  | 90 525                      |

The table presents unweighted predicted prevalences of underweight with 95% confidence intervals in square brackets. All models include the depicted parental education levels and their interaction. Model 1 is adjusted for child age, sex and country-level fixed effects. Model 2 is further adjusted for birth order, whether the child was born in a multiple birth, maternal age, height and partnership status, urban location of household as well as its wealth quintile as measured by household asset ownership. Lastly, Model 3 includes all covariates and PSU-level fixed effects. All standard errors were clustered on the PSU-level.

**Table B26: Relationship between parental education levels and wasting in children (adjusted for maternal height)**

|                                 |                                         |                | Mother: Non or incomplete primary | Mother: Primary or incomplete secondary | Mother: Secondary or higher |
|---------------------------------|-----------------------------------------|----------------|-----------------------------------|-----------------------------------------|-----------------------------|
| <b>Model 1</b><br>(N = 856 293) | Father: Non or incomplete primary       | Prevalence (%) | 10.52                             | 8.29                                    | 8.35                        |
|                                 |                                         | 95%-CI         | [10.38,10.66]                     | [8.05,8.54]                             | [7.69,9.02]                 |
|                                 |                                         | N              | 362 961                           | 50 353                                  | 5 631                       |
|                                 | Father: Primary or incomplete secondary | Prevalence (%) | 8.68                              | 7.45                                    | 6.82                        |
|                                 |                                         | 95%-CI         | [8.50,8.85]                       | [7.29,7.61]                             | [6.56,7.09]                 |
|                                 |                                         | N              | 115 400                           | 127 100                                 | 31 268                      |
|                                 | Father: Secondary or higher             | Prevalence (%) | 8.02                              | 6.76                                    | 6.89                        |
|                                 |                                         | 95%-CI         | [7.66,8.37]                       | [6.53,7.00]                             | [6.68,7.09]                 |
|                                 |                                         | N              | 25 288                            | 50 648                                  | 87 644                      |
| <b>Model 2</b><br>(N = 856 293) | Father: Non or incomplete primary       | Prevalence (%) | 9.98                              | 8.31                                    | 8.89                        |
|                                 |                                         | 95%-CI         | [9.84,10.12]                      | [8.06,8.55]                             | [8.22,9.56]                 |
|                                 |                                         | N              | 362 961                           | 50 353                                  | 5 631                       |
|                                 | Father: Primary or incomplete secondary | Prevalence (%) | 8.55                              | 7.81                                    | 7.75                        |
|                                 |                                         | 95%-CI         | [8.38,8.73]                       | [7.64,7.97]                             | [7.47,8.03]                 |
|                                 |                                         | N              | 115 400                           | 127 100                                 | 31 268                      |
|                                 | Father: Secondary or higher             | Prevalence (%) | 8.19                              | 7.42                                    | 7.97                        |
|                                 |                                         | 95%-CI         | [7.83,8.55]                       | [7.18,7.66]                             | [7.74,8.21]                 |
|                                 |                                         | N              | 25 288                            | 50 648                                  | 87 644                      |
| <b>Model 3</b><br>(N = 856 293) | Father: Non or incomplete primary       | Prevalence (%) | 9.60                              | 8.59                                    | 8.15                        |
|                                 |                                         | 95%-CI         | [9.48,9.72]                       | [8.33,8.86]                             | [7.45,8.85]                 |
|                                 |                                         | N              | 362 961                           | 50 353                                  | 5 631                       |
|                                 | Father: Primary or incomplete secondary | Prevalence (%) | 8.90                              | 8.35                                    | 7.81                        |
|                                 |                                         | 95%-CI         | [8.72,9.08]                       | [8.17,8.52]                             | [7.50,8.12]                 |
|                                 |                                         | N              | 115 400                           | 127 100                                 | 31 268                      |
|                                 | Father: Secondary or higher             | Prevalence (%) | 8.45                              | 7.84                                    | 7.84                        |
|                                 |                                         | 95%-CI         | [8.05,8.84]                       | [7.58,8.10]                             | [7.60,8.08]                 |
|                                 |                                         | N              | 25 288                            | 50 648                                  | 87 644                      |

The table presents unweighted predicted prevalences of wasting with 95% confidence intervals in square brackets. All models include the depicted parental education levels and their interaction. Model 1 is adjusted for child age, sex and country-level fixed effects. Model 2 is further adjusted for birth order, whether the child was born in a multiple birth, maternal age, height and partnership status, urban location of household as well as its wealth quintile as measured by household asset ownership. Lastly, Model 3 includes all covariates and PSU-level fixed effects. All standard errors were clustered on the PSU-level.

**Table B27: Years of schooling and child undernutrition (adjusted for maternal height)**

|                                                          | Model 1       |               |               | Model 2       |               |               | Model 3       |               |               |
|----------------------------------------------------------|---------------|---------------|---------------|---------------|---------------|---------------|---------------|---------------|---------------|
|                                                          | Stunting      | Underweight   | Wasting       | Stunting      | Underweight   | Wasting       | Stunting      | Underweight   | Wasting       |
| Maternal years of schooling                              | -1.48         | -0.85         | -0.19         | -0.70         | -0.44         | -0.12         | -0.40         | -0.29         | -0.11         |
|                                                          | [-1.51,-1.44] | [-0.88,-0.82] | [-0.21,-0.16] | [-0.74,-0.67] | [-0.47,-0.41] | [-0.15,-0.10] | [-0.44,-0.36] | [-0.32,-0.26] | [-0.13,-0.08] |
| Paternal years of schooling                              | -0.74         | -0.60         | -0.19         | -0.34         | -0.37         | -0.15         | -0.30         | -0.26         | -0.08         |
|                                                          | [-0.77,-0.71] | [-0.63,-0.58] | [-0.21,-0.17] | [-0.37,-0.31] | [-0.39,-0.34] | [-0.16,-0.13] | [-0.33,-0.27] | [-0.28,-0.23] | [-0.10,-0.06] |
| N                                                        | 863 690       | 882 817       | 853 627       | 863 690       | 882 817       | 853 627       | 863 690       | 882 817       | 853 627       |
| Paternal minus maternal school years                     | -0.05         | -0.15         | -0.07         | -0.01         | -0.11         | -0.06         | -0.08         | -0.08         | -0.02         |
|                                                          | [-0.08,-0.02] | [-0.17,-0.12] | [-0.09,-0.05] | [-0.04,0.02]  | [-0.13,-0.09] | [-0.08,-0.04] | [-0.11,-0.05] | [-0.11,-0.06] | [-0.04,-0.00] |
| N                                                        | 863 690       | 882 817       | 853 627       | 863 690       | 882 817       | 853 627       | 863 690       | 882 817       | 853 627       |
| Paternal divided by maternal school years                | -0.31         | -0.14         | -0.02         | 0.01          | 0.01          | 0.00          | -0.27         | -0.11         | -0.02         |
|                                                          | [-0.45,-0.17] | [-0.24,-0.03] | [-0.09,0.05]  | [-0.12,0.15]  | [-0.09,0.12]  | [-0.07,0.07]  | [-0.43,-0.11] | [-0.24,0.01]  | [-0.11,0.06]  |
| N                                                        | 494 401       | 502 491       | 488 338       | 494 401       | 502 491       | 488 338       | 494 401       | 502 491       | 488 338       |
| Different number of school years                         | -3.05         | -4.17         | -1.80         | -1.65         | -3.27         | -1.58         | -1.07         | -1.43         | -0.65         |
|                                                          | [-3.30,-2.79] | [-4.39,-3.95] | [-1.96,-1.64] | [-1.91,-1.40] | [-3.49,-3.06] | [-1.74,-1.42] | [-1.35,-0.79] | [-1.66,-1.20] | [-0.83,-0.48] |
| Mother completed more years of schooling than the father | -2.54         | -0.94         | -0.11         | -1.39         | -0.39         | -0.06         | -0.02         | 0.01          | -0.12         |
|                                                          | [-2.83,-2.26] | [-1.16,-0.72] | [-0.26,0.05]  | [-1.66,-1.11] | [-0.61,-0.17] | [-0.22,0.10]  | [-0.32,0.29]  | [-0.24,0.25]  | [-0.30,0.06]  |
| N                                                        | 863 690       | 882 817       | 853 627       | 863 690       | 882 817       | 853 627       | 863 690       | 882 817       | 853 627       |

The table presents unweighted marginal effects in percentage points on different forms of child undernutrition with 95% confidence intervals in square brackets below. Model 1 is only adjusted for child age, sex and country-level fixed effects. Model 2 further controls for child birth order, whether the child was born in a multiple birth, maternal age, height and partnership status, urban location of household as well as its wealth quintile as measured by household asset ownership. Model 3 is additionally adjusted for local area characteristics (PSU-level fixed effects). All standard errors were clustered on the PSU-level. For each model type, different specifications were estimated, using either maternal and paternal years of schooling or the following composite indicators as exposure: "Paternal minus maternal school years", "paternal divided by maternal school years", or the two binary indicators "different number of school years" and "mother completed more years of schooling than the father". With the exception of the main effects models (i.e. maternal and paternal years of schooling), all specifications control for the number of school years achieved by the least educated parent.

**Table B28: Relationship between parental education levels and stunting in children (countries weighted equally)**

|                                 |                                         |                | Mother: Non or incomplete primary | Mother: Primary or incomplete secondary | Mother: Secondary or higher |
|---------------------------------|-----------------------------------------|----------------|-----------------------------------|-----------------------------------------|-----------------------------|
| <b>Model 1</b><br>(N = 952 253) | Father: Non or incomplete primary       | Prevalence (%) | 42.81                             | 34.03                                   | 26.22                       |
|                                 |                                         | 95%-CI         | [42.45,43.17]                     | [33.23,34.82]                           | [23.61,28.84]               |
|                                 |                                         | N              | 405 181                           | 56 307                                  | 6 656                       |
|                                 | Father: Primary or incomplete secondary | Prevalence (%) | 36.89                             | 27.96                                   | 21.38                       |
|                                 |                                         | 95%-CI         | [36.36,37.42]                     | [27.42,28.49]                           | [20.23,22.52]               |
|                                 |                                         | N              | 129 600                           | 140 678                                 | 34 391                      |
|                                 | Father: Secondary or higher             | Prevalence (%) | 31.22                             | 23.43                                   | 18.27                       |
|                                 |                                         | 95%-CI         | [30.12,32.32]                     | [22.58,24.29]                           | [17.52,19.02]               |
|                                 |                                         | N              | 27 910                            | 56 192                                  | 95 338                      |
| <b>Model 2</b><br>(N = 952 253) | Father: Non or incomplete primary       | Prevalence (%) | 39.20                             | 33.54                                   | 30.05                       |
|                                 |                                         | 95%-CI         | [38.82,39.57]                     | [32.75,34.33]                           | [27.47,32.64]               |
|                                 |                                         | N              | 405 181                           | 56 307                                  | 6 656                       |
|                                 | Father: Primary or incomplete secondary | Prevalence (%) | 35.63                             | 30.03                                   | 27.28                       |
|                                 |                                         | 95%-CI         | [35.12,36.14]                     | [29.49,30.57]                           | [26.13,28.42]               |
|                                 |                                         | N              | 129 600                           | 140 678                                 | 34 391                      |
|                                 | Father: Secondary or higher             | Prevalence (%) | 32.05                             | 27.67                                   | 25.99                       |
|                                 |                                         | 95%-CI         | [30.96,33.13]                     | [26.81,28.54]                           | [25.16,26.82]               |
|                                 |                                         | N              | 27 910                            | 56 192                                  | 95 338                      |
| <b>Model 3</b><br>(N = 952 253) | Father: Non or incomplete primary       | Prevalence (%) | 37.55                             | 34.63                                   | 30.99                       |
|                                 |                                         | 95%-CI         | [37.18,37.92]                     | [33.82,35.45]                           | [28.08,33.90]               |
|                                 |                                         | N              | 405 181                           | 56 307                                  | 6 656                       |
|                                 | Father: Primary or incomplete secondary | Prevalence (%) | 35.08                             | 31.31                                   | 29.27                       |
|                                 |                                         | 95%-CI         | [34.56,35.60]                     | [30.73,31.88]                           | [27.99,30.54]               |
|                                 |                                         | N              | 129 600                           | 140 678                                 | 34 391                      |
|                                 | Father: Secondary or higher             | Prevalence (%) | 32.05                             | 29.21                                   | 28.64                       |
|                                 |                                         | 95%-CI         | [30.81,33.29]                     | [28.26,30.15]                           | [27.69,29.58]               |
|                                 |                                         | N              | 27 910                            | 56 192                                  | 95 338                      |

The table presents predicted prevalences of stunting with 95% confidence intervals in square brackets. Regressions are weighted such that sampling weights sum up to 1 in every country. All models include the depicted parental education levels and their interaction. Model 1 is adjusted for child age, sex and country-level fixed effects. Model 2 is further adjusted for birth order, whether the child was born in a multiple birth, maternal age and partnership status, urban location of household as well as its wealth quintile as measured by household asset ownership. Lastly, Model 3 includes all covariates and PSU-level fixed effects. All standard errors were clustered on the PSU-level.



**Table B29: Relationship between parental education levels and underweight in children (countries weighted equally)**

|                                 |                                         |                | Mother: Non or incomplete primary | Mother: Primary or incomplete secondary | Mother: Secondary or higher |
|---------------------------------|-----------------------------------------|----------------|-----------------------------------|-----------------------------------------|-----------------------------|
| <b>Model 1</b><br>(N = 981 740) | Father: Non or incomplete primary       | Prevalence (%) | 24.09                             | 17.07                                   | 13.73                       |
|                                 |                                         | 95%-CI         | [23.81,24.38]                     | [16.46,17.68]                           | [11.89,15.57]               |
|                                 |                                         | N              | 419 823                           | 57 541                                  | 6 833                       |
|                                 | Father: Primary or incomplete secondary | Prevalence (%) | 19.25                             | 13.97                                   | 10.49                       |
|                                 |                                         | 95%-CI         | [18.82,19.69]                     | [13.54,14.40]                           | [9.85,11.14]                |
|                                 |                                         | N              | 133 963                           | 144 192                                 | 34 966                      |
|                                 | Father: Secondary or higher             | Prevalence (%) | 15.67                             | 11.52                                   | 9.48                        |
|                                 |                                         | 95%-CI         | [14.85,16.48]                     | [10.98,12.06]                           | [8.95,10.01]                |
|                                 |                                         | N              | 28 955                            | 57 825                                  | 97 642                      |
| <b>Model 2</b><br>(N = 981 740) | Father: Non or incomplete primary       | Prevalence (%) | 21.93                             | 16.89                                   | 15.91                       |
|                                 |                                         | 95%-CI         | [21.65,22.22]                     | [16.28,17.50]                           | [14.04,17.78]               |
|                                 |                                         | N              | 419 823                           | 57 541                                  | 6 833                       |
|                                 | Father: Primary or incomplete secondary | Prevalence (%) | 18.63                             | 15.29                                   | 13.85                       |
|                                 |                                         | 95%-CI         | [18.19,19.06]                     | [14.85,15.72]                           | [13.19,14.52]               |
|                                 |                                         | N              | 133 963                           | 144 192                                 | 34 966                      |
|                                 | Father: Secondary or higher             | Prevalence (%) | 16.22                             | 14.06                                   | 13.79                       |
|                                 |                                         | 95%-CI         | [15.42,17.03]                     | [13.51,14.62]                           | [13.22,14.36]               |
|                                 |                                         | N              | 28 955                            | 57 825                                  | 97 642                      |
| <b>Model 3</b><br>(N = 981 740) | Father: Non or incomplete primary       | Prevalence (%) | 20.78                             | 17.80                                   | 17.03                       |
|                                 |                                         | 95%-CI         | [20.51,21.06]                     | [17.07,18.53]                           | [14.91,19.15]               |
|                                 |                                         | N              | 419 823                           | 57 541                                  | 6 833                       |
|                                 | Father: Primary or incomplete secondary | Prevalence (%) | 18.83                             | 16.22                                   | 14.72                       |
|                                 |                                         | 95%-CI         | [18.38,19.28]                     | [15.82,16.62]                           | [13.88,15.56]               |
|                                 |                                         | N              | 133 963                           | 144 192                                 | 34 966                      |
|                                 | Father: Secondary or higher             | Prevalence (%) | 16.42                             | 15.50                                   | 14.60                       |
|                                 |                                         | 95%-CI         | [15.53,17.32]                     | [14.87,16.14]                           | [14.01,15.20]               |
|                                 |                                         | N              | 28 955                            | 57 825                                  | 97 642                      |

The table presents predicted prevalences of underweight with 95% confidence intervals in square brackets. Regressions are weighted such that sampling weights sum up to 1 in every country. All models include the depicted parental education levels and their interaction. Model 1 is adjusted for child age, sex and country-level fixed effects. Model 2 is further adjusted for birth order, whether the child was born in a multiple birth, maternal age and partnership status, urban location of household as well as its wealth quintile as measured by household asset ownership. Lastly, Model 3 includes all covariates and PSU-level fixed effects. All standard errors were clustered on the PSU-level.

**Table B30: Relationship between parental education levels and wasting in children (countries weighted equally)**

|                                 |                                         |                | Mother: Non or incomplete primary | Mother: Primary or incomplete secondary | Mother: Secondary or higher |
|---------------------------------|-----------------------------------------|----------------|-----------------------------------|-----------------------------------------|-----------------------------|
| <b>Model 1</b><br>(N = 941 721) | Father: Non or incomplete primary       | Prevalence (%) | 9.52                              | 7.70                                    | 7.24                        |
|                                 |                                         | 95%-CI         | [9.32,9.71]                       | [7.27,8.13]                             | [5.44,9.04]                 |
|                                 |                                         | N              | 400 355                           | 55 588                                  | 6 602                       |
|                                 | Father: Primary or incomplete secondary | Prevalence (%) | 7.98                              | 6.98                                    | 5.90                        |
|                                 |                                         | 95%-CI         | [7.69,8.27]                       | [6.66,7.30]                             | [5.32,6.48]                 |
|                                 |                                         | N              | 128 315                           | 139 109                                 | 34 063                      |
|                                 | Father: Secondary or higher             | Prevalence (%) | 7.69                              | 6.36                                    | 6.04                        |
|                                 |                                         | 95%-CI         | [7.05,8.32]                       | [5.86,6.86]                             | [5.58,6.50]                 |
|                                 |                                         | N              | 27 689                            | 55 652                                  | 94 348                      |
| <b>Model 2</b><br>(N = 941 721) | Father: Non or incomplete primary       | Prevalence (%) | 9.06                              | 7.69                                    | 7.65                        |
|                                 |                                         | 95%-CI         | [8.86,9.27]                       | [7.26,8.12]                             | [5.84,9.46]                 |
|                                 |                                         | N              | 400 355                           | 55 588                                  | 6 602                       |
|                                 | Father: Primary or incomplete secondary | Prevalence (%) | 7.88                              | 7.29                                    | 6.55                        |
|                                 |                                         | 95%-CI         | [7.59,8.17]                       | [6.96,7.61]                             | [5.95,7.14]                 |
|                                 |                                         | N              | 128 315                           | 139 109                                 | 34 063                      |
|                                 | Father: Secondary or higher             | Prevalence (%) | 7.81                              | 6.90                                    | 6.85                        |
|                                 |                                         | 95%-CI         | [7.17,8.44]                       | [6.38,7.41]                             | [6.37,7.33]                 |
|                                 |                                         | N              | 27 689                            | 55 652                                  | 94 348                      |
| <b>Model 3</b><br>(N = 941 721) | Father: Non or incomplete primary       | Prevalence (%) | 8.80                              | 7.88                                    | 8.15                        |
|                                 |                                         | 95%-CI         | [8.60,8.99]                       | [7.38,8.37]                             | [5.93,10.37]                |
|                                 |                                         | N              | 400 355                           | 55 588                                  | 6 602                       |
|                                 | Father: Primary or incomplete secondary | Prevalence (%) | 8.04                              | 7.51                                    | 6.72                        |
|                                 |                                         | 95%-CI         | [7.73,8.35]                       | [7.18,7.84]                             | [6.01,7.42]                 |
|                                 |                                         | N              | 128 315                           | 139 109                                 | 34 063                      |
|                                 | Father: Secondary or higher             | Prevalence (%) | 7.77                              | 7.32                                    | 6.84                        |
|                                 |                                         | 95%-CI         | [7.06,8.48]                       | [6.73,7.91]                             | [6.32,7.36]                 |
|                                 |                                         | N              | 27 689                            | 55 652                                  | 94 348                      |

The table presents predicted prevalences of wasting with 95% confidence intervals in square brackets. Regressions are weighted such that sampling weights sum up to 1 in every country. All models include the depicted parental education levels and their interaction. Model 1 is adjusted for child age, sex and country-level fixed effects. Model 2 is further adjusted for birth order, whether the child was born in a multiple birth, maternal age and partnership status, urban location of household as well as its wealth quintile as measured by household asset ownership. Lastly, Model 3 includes all covariates and PSU-level fixed effects. All standard errors were clustered on the PSU-level.

**Table B31: Years of schooling and child undernutrition (countries weighted equally)**

|                                                          | Model 1       |               |               | Model 2       |               |               | Model 3       |               |               |
|----------------------------------------------------------|---------------|---------------|---------------|---------------|---------------|---------------|---------------|---------------|---------------|
|                                                          | Stunting      | Underweight   | Wasting       | Stunting      | Underweight   | Wasting       | Stunting      | Underweight   | Wasting       |
| Maternal years of schooling                              | -1.36         | -0.86         | -0.23         | -0.81         | -0.57         | -0.18         | -0.54         | -0.38         | -0.13         |
|                                                          | [-1.43,-1.28] | [-0.92,-0.80] | [-0.29,-0.18] | [-0.88,-0.73] | [-0.63,-0.51] | [-0.24,-0.13] | [-0.63,-0.46] | [-0.45,-0.32] | [-0.19,-0.08] |
| Paternal years of schooling                              | -0.76         | -0.53         | -0.13         | -0.43         | -0.34         | -0.09         | -0.32         | -0.27         | -0.08         |
|                                                          | [-0.82,-0.70] | [-0.57,-0.48] | [-0.17,-0.10] | [-0.49,-0.37] | [-0.39,-0.29] | [-0.13,-0.06] | [-0.39,-0.26] | [-0.32,-0.22] | [-0.12,-0.04] |
| N                                                        | 948 642       | 977 862       | 938 208       | 948 642       | 977 862       | 938 208       | 948 642       | 977 862       | 938 208       |
| Paternal minus maternal school years                     | -0.03         | -0.05         | -0.01         | -0.00         | -0.03         | 0.00          | -0.03         | -0.05         | -0.01         |
|                                                          | [-0.09,0.03]  | [-0.10,-0.00] | [-0.05,0.03]  | [-0.06,0.05]  | [-0.07,0.02]  | [-0.04,0.04]  | [-0.09,0.03]  | [-0.10,0.00]  | [-0.05,0.03]  |
| N                                                        | 948 642       | 977 862       | 938 208       | 948 642       | 977 862       | 938 208       | 948 642       | 977 862       | 938 208       |
| Paternal divided by maternal school years                | -0.76         | -0.16         | -0.03         | -0.37         | 0.03          | -0.01         | -0.44         | -0.15         | -0.04         |
|                                                          | [-1.01,-0.50] | [-0.38,0.06]  | [-0.19,0.12]  | [-0.61,-0.12] | [-0.19,0.26]  | [-0.16,0.15]  | [-0.75,-0.14] | [-0.39,0.10]  | [-0.22,0.14]  |
| N                                                        | 541 451       | 553 108       | 534 938       | 541 451       | 553 108       | 534 938       | 541 451       | 553 108       | 534 938       |
| Different number of school years                         | -3.12         | -3.40         | -1.38         | -1.90         | -2.58         | -1.18         | -1.09         | -1.28         | -0.51         |
|                                                          | [-3.61,-2.63] | [-3.79,-3.00] | [-1.67,-1.08] | [-2.40,-1.41] | [-2.97,-2.18] | [-1.48,-0.88] | [-1.65,-0.54] | [-1.69,-0.87] | [-0.83,-0.19] |
| Mother completed more years of schooling than the father | -1.77         | -1.22         | -0.43         | -1.18         | -0.96         | -0.41         | -0.41         | -0.30         | -0.22         |
|                                                          | [-2.36,-1.18] | [-1.68,-0.76] | [-0.78,-0.08] | [-1.76,-0.61] | [-1.41,-0.50] | [-0.75,-0.06] | [-1.03,0.21]  | [-0.76,0.15]  | [-0.59,0.15]  |
| N                                                        | 948 642       | 977 862       | 938 208       | 948 642       | 977 862       | 938 208       | 948 642       | 977 862       | 938 208       |

The table presents unweighted marginal effects in percentage points on different forms of child undernutrition with 95% confidence intervals in square brackets below. Regressions are weighted such that sampling weights sum up to 1 in every country. Model 1 is only adjusted for child age, sex and country-level fixed effects. Model 2 further controls for child birth order, whether the child was born in a multiple birth, maternal age and partnership status, urban location of household as well as its wealth quintile as measured by household asset ownership. Model 3 is additionally adjusted for local area characteristics (PSU-level fixed effects). All standard errors were clustered on the PSU-level. For each model type, different specifications were estimated, using either maternal and paternal years of schooling or the following composite indicators as exposure: "Paternal minus maternal school years", "paternal divided by maternal school years", or the two binary indicators "different number of school years" and "mother completed more years of schooling than the father". With the exception of the main effects models (i.e. maternal and paternal years of schooling), all specifications control for the number of school years achieved by the least educated parent.

**Table B32: Relationship between parental education levels and stunting in children (countries weighted by population)**

|                                 |                                         |                | Mother: Non or incomplete primary | Mother: Primary or incomplete secondary | Mother: Secondary or higher |
|---------------------------------|-----------------------------------------|----------------|-----------------------------------|-----------------------------------------|-----------------------------|
| <b>Model 1</b><br>(N = 952 253) | Father: Non or incomplete primary       | Prevalence (%) | 51.65                             | 41.62                                   | 29.74                       |
|                                 |                                         | 95%-CI         | [51.19,52.11]                     | [40.57,42.68]                           | [27.04,32.44]               |
|                                 |                                         | N              | 405 181                           | 56 307                                  | 6 656                       |
|                                 | Father: Primary or incomplete secondary | Prevalence (%) | 46.95                             | 34.28                                   | 25.31                       |
|                                 |                                         | 95%-CI         | [46.30,47.60]                     | [33.67,34.89]                           | [24.12,26.50]               |
|                                 |                                         | N              | 129 600                           | 140 678                                 | 34 391                      |
|                                 | Father: Secondary or higher             | Prevalence (%) | 43.24                             | 30.71                                   | 22.12                       |
|                                 |                                         | 95%-CI         | [41.94,44.54]                     | [29.79,31.63]                           | [21.33,22.90]               |
|                                 |                                         | N              | 27 910                            | 56 192                                  | 95 338                      |
| <b>Model 2</b><br>(N = 952 253) | Father: Non or incomplete primary       | Prevalence (%) | 48.19                             | 41.40                                   | 33.89                       |
|                                 |                                         | 95%-CI         | [47.72,48.65]                     | [40.36,42.44]                           | [31.23,36.54]               |
|                                 |                                         | N              | 405 181                           | 56 307                                  | 6 656                       |
|                                 | Father: Primary or incomplete secondary | Prevalence (%) | 45.46                             | 36.69                                   | 32.46                       |
|                                 |                                         | 95%-CI         | [44.82,46.10]                     | [36.07,37.31]                           | [31.23,33.69]               |
|                                 |                                         | N              | 129 600                           | 140 678                                 | 34 391                      |
|                                 | Father: Secondary or higher             | Prevalence (%) | 43.26                             | 35.10                                   | 30.94                       |
|                                 |                                         | 95%-CI         | [41.98,44.55]                     | [34.16,36.05]                           | [30.04,31.83]               |
|                                 |                                         | N              | 27 910                            | 56 192                                  | 95 338                      |
| <b>Model 3</b><br>(N = 952 253) | Father: Non or incomplete primary       | Prevalence (%) | 46.84                             | 43.08                                   | 35.71                       |
|                                 |                                         | 95%-CI         | [46.42,47.26]                     | [41.98,44.18]                           | [32.55,38.86]               |
|                                 |                                         | N              | 405 181                           | 56 307                                  | 6 656                       |
|                                 | Father: Primary or incomplete secondary | Prevalence (%) | 44.65                             | 38.56                                   | 35.45                       |
|                                 |                                         | 95%-CI         | [44.01,45.30]                     | [37.89,39.23]                           | [34.01,36.89]               |
|                                 |                                         | N              | 129 600                           | 140 678                                 | 34 391                      |
|                                 | Father: Secondary or higher             | Prevalence (%) | 41.87                             | 35.95                                   | 32.83                       |
|                                 |                                         | 95%-CI         | [40.52,43.21]                     | [34.95,36.96]                           | [31.82,33.84]               |
|                                 |                                         | N              | 27 910                            | 56 192                                  | 95 338                      |

The table presents predicted prevalences of stunting with 95% confidence intervals in square brackets. Regressions are weighted such that sampling weights sum up to population size in every country. All models include the depicted parental education levels and their interaction. Model 1 is adjusted for child age, sex and country-level fixed effects. Model 2 is further adjusted for birth order, whether the child was born in a multiple birth, maternal age and partnership status, urban location of household as well as its wealth quintile as measured by household asset ownership. Lastly, Model 3 includes all covariates and PSU-level fixed effects. All standard errors were clustered on the PSU-level.

**Table B33: Relationship between parental education levels and underweight in children (countries weighted by population)**

|                                 |                                         |                | Mother: Non or incomplete primary | Mother: Primary or incomplete secondary | Mother: Secondary or higher |
|---------------------------------|-----------------------------------------|----------------|-----------------------------------|-----------------------------------------|-----------------------------|
| <b>Model 1</b><br>(N = 981 740) | Father: Non or incomplete primary       | Prevalence (%) | 40.56                             | 29.39                                   | 24.61                       |
|                                 |                                         | 95%-CI         | [40.13,40.99]                     | [28.49,30.29]                           | [22.42,26.79]               |
|                                 |                                         | N              | 419 823                           | 57 541                                  | 6 833                       |
|                                 | Father: Primary or incomplete secondary | Prevalence (%) | 35.29                             | 24.09                                   | 17.41                       |
|                                 |                                         | 95%-CI         | [34.66,35.92]                     | [23.55,24.64]                           | [16.44,18.39]               |
|                                 |                                         | N              | 133 963                           | 144 192                                 | 34 966                      |
|                                 | Father: Secondary or higher             | Prevalence (%) | 32.01                             | 20.37                                   | 15.10                       |
|                                 |                                         | 95%-CI         | [30.76,33.26]                     | [19.59,21.16]                           | [14.45,15.76]               |
|                                 |                                         | N              | 28 955                            | 57 825                                  | 97 642                      |
| <b>Model 2</b><br>(N = 981 740) | Father: Non or incomplete primary       | Prevalence (%) | 37.50                             | 29.32                                   | 27.90                       |
|                                 |                                         | 95%-CI         | [37.06,37.94]                     | [28.42,30.22]                           | [25.74,30.07]               |
|                                 |                                         | N              | 419 823                           | 57 541                                  | 6 833                       |
|                                 | Father: Primary or incomplete secondary | Prevalence (%) | 34.22                             | 26.43                                   | 23.44                       |
|                                 |                                         | 95%-CI         | [33.60,34.84]                     | [25.88,26.99]                           | [22.42,24.45]               |
|                                 |                                         | N              | 133 963                           | 144 192                                 | 34 966                      |
|                                 | Father: Secondary or higher             | Prevalence (%) | 32.38                             | 24.51                                   | 22.40                       |
|                                 |                                         | 95%-CI         | [31.15,33.60]                     | [23.70,25.32]                           | [21.65,23.14]               |
|                                 |                                         | N              | 28 955                            | 57 825                                  | 97 642                      |
| <b>Model 3</b><br>(N = 981 740) | Father: Non or incomplete primary       | Prevalence (%) | 36.38                             | 31.24                                   | 30.61                       |
|                                 |                                         | 95%-CI         | [35.99,36.77]                     | [30.30,32.17]                           | [28.11,33.11]               |
|                                 |                                         | N              | 419 823                           | 57 541                                  | 6 833                       |
|                                 | Father: Primary or incomplete secondary | Prevalence (%) | 33.86                             | 28.02                                   | 25.36                       |
|                                 |                                         | 95%-CI         | [33.27,34.46]                     | [27.44,28.61]                           | [24.19,26.53]               |
|                                 |                                         | N              | 133 963                           | 144 192                                 | 34 966                      |
|                                 | Father: Secondary or higher             | Prevalence (%) | 31.45                             | 25.25                                   | 23.17                       |
|                                 |                                         | 95%-CI         | [30.17,32.74]                     | [24.36,26.15]                           | [22.27,24.08]               |
|                                 |                                         | N              | 28 955                            | 57 825                                  | 97 642                      |

The table presents predicted prevalences of underweight with 95% confidence intervals in square brackets. Regressions are weighted such that sampling weights sum up to population size in every country. All models include the depicted parental education levels and their interaction. Model 1 is adjusted for child age, sex and country-level fixed effects. Model 2 is further adjusted for birth order, whether the child was born in a multiple birth, maternal age and partnership status, urban location of household as well as its wealth quintile as measured by household asset ownership. Lastly, Model 3 includes all covariates and PSU-level fixed effects. All standard errors were clustered on the PSU-level.

**Table B34: Relationship between parental education levels and wasting in children (countries weighted by population)**

|                                 |                                         |                | Mother: Non or incomplete primary | Mother: Primary or incomplete secondary | Mother: Secondary or higher |
|---------------------------------|-----------------------------------------|----------------|-----------------------------------|-----------------------------------------|-----------------------------|
| <b>Model 1</b><br>(N = 941 721) | Father: Non or incomplete primary       | Prevalence (%) | 16.44                             | 12.62                                   | 12.20                       |
|                                 |                                         | 95%-CI         | [16.07,16.81]                     | [11.91,13.34]                           | [10.18,14.22]               |
|                                 |                                         | N              | 400 355                           | 55 588                                  | 6 602                       |
|                                 | Father: Primary or incomplete secondary | Prevalence (%) | 13.93                             | 11.24                                   | 9.11                        |
|                                 |                                         | 95%-CI         | [13.44,14.42]                     | [10.83,11.65]                           | [8.36,9.86]                 |
|                                 |                                         | N              | 128 315                           | 139 109                                 | 34 063                      |
|                                 | Father: Secondary or higher             | Prevalence (%) | 13.24                             | 9.70                                    | 8.89                        |
|                                 |                                         | 95%-CI         | [12.22,14.27]                     | [9.10,10.31]                            | [8.37,9.41]                 |
|                                 |                                         | N              | 27 689                            | 55 652                                  | 94 348                      |
| <b>Model 2</b><br>(N = 941 721) | Father: Non or incomplete primary       | Prevalence (%) | 15.52                             | 12.69                                   | 12.94                       |
|                                 |                                         | 95%-CI         | [15.16,15.88]                     | [11.97,13.41]                           | [10.94,14.94]               |
|                                 |                                         | N              | 400 355                           | 55 588                                  | 6 602                       |
|                                 | Father: Primary or incomplete secondary | Prevalence (%) | 13.70                             | 12.01                                   | 10.58                       |
|                                 |                                         | 95%-CI         | [13.21,14.18]                     | [11.58,12.43]                           | [9.80,11.37]                |
|                                 |                                         | N              | 128 315                           | 139 109                                 | 34 063                      |
|                                 | Father: Secondary or higher             | Prevalence (%) | 13.48                             | 10.93                                   | 10.63                       |
|                                 |                                         | 95%-CI         | [12.45,14.51]                     | [10.31,11.56]                           | [10.05,11.20]               |
|                                 |                                         | N              | 27 689                            | 55 652                                  | 94 348                      |
| <b>Model 3</b><br>(N = 941 721) | Father: Non or incomplete primary       | Prevalence (%) | 15.20                             | 13.00                                   | 13.35                       |
|                                 |                                         | 95%-CI         | [14.88,15.53]                     | [12.25,13.75]                           | [10.92,15.78]               |
|                                 |                                         | N              | 400 355                           | 55 588                                  | 6 602                       |
|                                 | Father: Primary or incomplete secondary | Prevalence (%) | 13.72                             | 12.41                                   | 11.03                       |
|                                 |                                         | 95%-CI         | [13.24,14.20]                     | [11.94,12.88]                           | [10.04,12.03]               |
|                                 |                                         | N              | 128 315                           | 139 109                                 | 34 063                      |
|                                 | Father: Secondary or higher             | Prevalence (%) | 13.52                             | 11.27                                   | 10.61                       |
|                                 |                                         | 95%-CI         | [12.41,14.63]                     | [10.58,11.96]                           | [9.93,11.30]                |
|                                 |                                         | N              | 27 689                            | 55 652                                  | 94 348                      |

The table presents predicted prevalences of wasting with 95% confidence intervals in square brackets. Regressions are weighted such that sampling weights sum up to population size in every country. All models include the depicted parental education levels and their interaction. Model 1 is adjusted for child age, sex and country-level fixed effects. Model 2 is further adjusted for birth order, whether the child was born in a multiple birth, maternal age and partnership status, urban location of household as well as its wealth quintile as measured by household asset ownership. Lastly, Model 3 includes all covariates and PSU-level fixed effects. All standard errors were clustered on the PSU-level.

**Table B35: Years of schooling and child undernutrition (countries weighted by population)**

|                                                          | Model 1       |               |               | Model 2       |               |               | Model 3       |               |               |
|----------------------------------------------------------|---------------|---------------|---------------|---------------|---------------|---------------|---------------|---------------|---------------|
|                                                          | Stunting      | Underweight   | Wasting       | Stunting      | Underweight   | Wasting       | Stunting      | Underweight   | Wasting       |
| Maternal years of schooling                              | -1.71         | -1.51         | -0.41         | -1.11         | -1.04         | -0.30         | -0.78         | -0.79         | -0.25         |
|                                                          | [-1.78,-1.64] | [-1.58,-1.44] | [-0.46,-0.35] | [-1.19,-1.04] | [-1.11,-0.97] | [-0.35,-0.24] | [-0.88,-0.69] | [-0.87,-0.70] | [-0.32,-0.18] |
| Paternal years of schooling                              | -0.67         | -0.65         | -0.25         | -0.41         | -0.40         | -0.17         | -0.41         | -0.41         | -0.15         |
|                                                          | [-0.74,-0.60] | [-0.72,-0.59] | [-0.30,-0.20] | [-0.47,-0.34] | [-0.47,-0.34] | [-0.22,-0.12] | [-0.48,-0.33] | [-0.48,-0.34] | [-0.21,-0.09] |
| N                                                        | 948 642       | 977 862       | 938 208       | 948 642       | 977 862       | 938 208       | 948 642       | 977 862       | 938 208       |
| Paternal minus maternal school years                     | -0.09         | -0.12         | -0.09         | -0.03         | -0.04         | -0.05         | -0.12         | -0.12         | -0.05         |
|                                                          | [-0.15,-0.02] | [-0.18,-0.06] | [-0.13,-0.04] | [-0.09,0.04]  | [-0.10,0.02]  | [-0.10,-0.00] | [-0.19,-0.05] | [-0.18,-0.05] | [-0.11,0.00]  |
| N                                                        | 948 642       | 977 862       | 938 208       | 948 642       | 977 862       | 938 208       | 948 642       | 977 862       | 938 208       |
| Paternal divided by maternal school years                | -0.42         | -0.13         | -0.02         | -0.13         | 0.13          | 0.04          | -0.47         | -0.39         | -0.13         |
|                                                          | [-0.82,-0.03] | [-0.47,0.22]  | [-0.25,0.21]  | [-0.52,0.26]  | [-0.22,0.47]  | [-0.19,0.27]  | [-0.95,0.01]  | [-0.83,0.06]  | [-0.42,0.15]  |
| N                                                        | 541 451       | 553 108       | 534 938       | 541 451       | 553 108       | 534 938       | 541 451       | 553 108       | 534 938       |
| Different number of school years                         | -3.13         | -3.71         | -1.77         | -2.01         | -2.48         | -1.27         | -1.43         | -1.39         | -0.61         |
|                                                          | [-3.66,-2.60] | [-4.23,-3.19] | [-2.18,-1.35] | [-2.54,-1.47] | [-2.99,-1.96] | [-1.69,-0.86] | [-2.03,-0.82] | [-1.96,-0.81] | [-1.08,-0.14] |
| Mother completed more years of schooling than the father | -2.58         | -2.83         | -0.92         | -1.84         | -2.40         | -0.87         | -0.46         | -1.04         | -0.70         |
|                                                          | [-3.26,-1.91] | [-3.40,-2.26] | [-1.38,-0.47] | [-2.50,-1.17] | [-2.97,-1.84] | [-1.32,-0.42] | [-1.21,0.29]  | [-1.67,-0.40] | [-1.21,-0.18] |
| N                                                        | 948 642       | 977 862       | 938 208       | 948 642       | 977 862       | 938 208       | 948 642       | 977 862       | 938 208       |

The table presents marginal effects in percentage points on different forms of child undernutrition with 95% confidence intervals in square brackets below. Regressions are weighted such that sampling weights sum up to population size in every country. Model 1 is only adjusted for child age, sex and country-level fixed effects. Model 2 further controls for child birth order, whether the child was born in a multiple birth, maternal age and partnership status, urban location of household as well as its wealth quintile as measured by household asset ownership. Model 3 is additionally adjusted for local area characteristics (PSU-level fixed effects). All standard errors were clustered on the PSU-level. For each model type, different specifications were estimated, using either maternal and paternal years of schooling or the following composite indicators as exposure: "Paternal minus maternal school years", "paternal divided by maternal school years", or the two binary indicators "different number of school years" and "mother completed more years of schooling than the father". With the exception of the main effects models (i.e. maternal and paternal years of schooling), all specifications control for the number of school years achieved by the least educated parent.

**Figure B1: Test of linearity assumption (stunting)**

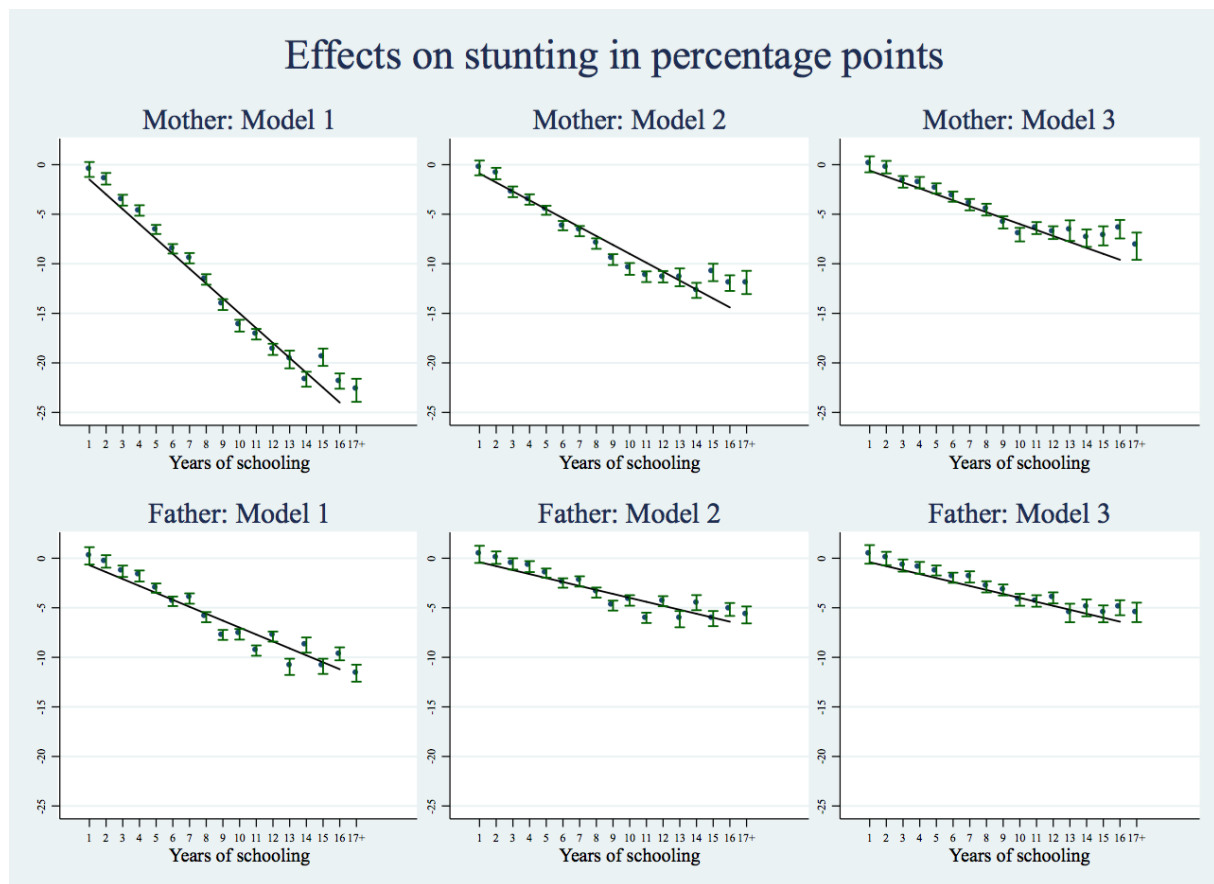

The above graphs depict trend lines (black lines) showing the effect of years of schooling (derived from the marginal effects of the first section of Table 4 from the article) on stunting for different values of years of schooling. The blue dots are point estimates from a flexible regression using each year of schooling as a dummy variable (with zero years as a reference category and school years larger or equal than 17 pooled in one binary indicator). 95%-confidence intervals are depicted in green. All regressions are mutually adjusted, i.e. they include both maternal and paternal school years.



Figure B2: Test of linearity assumption (underweight)

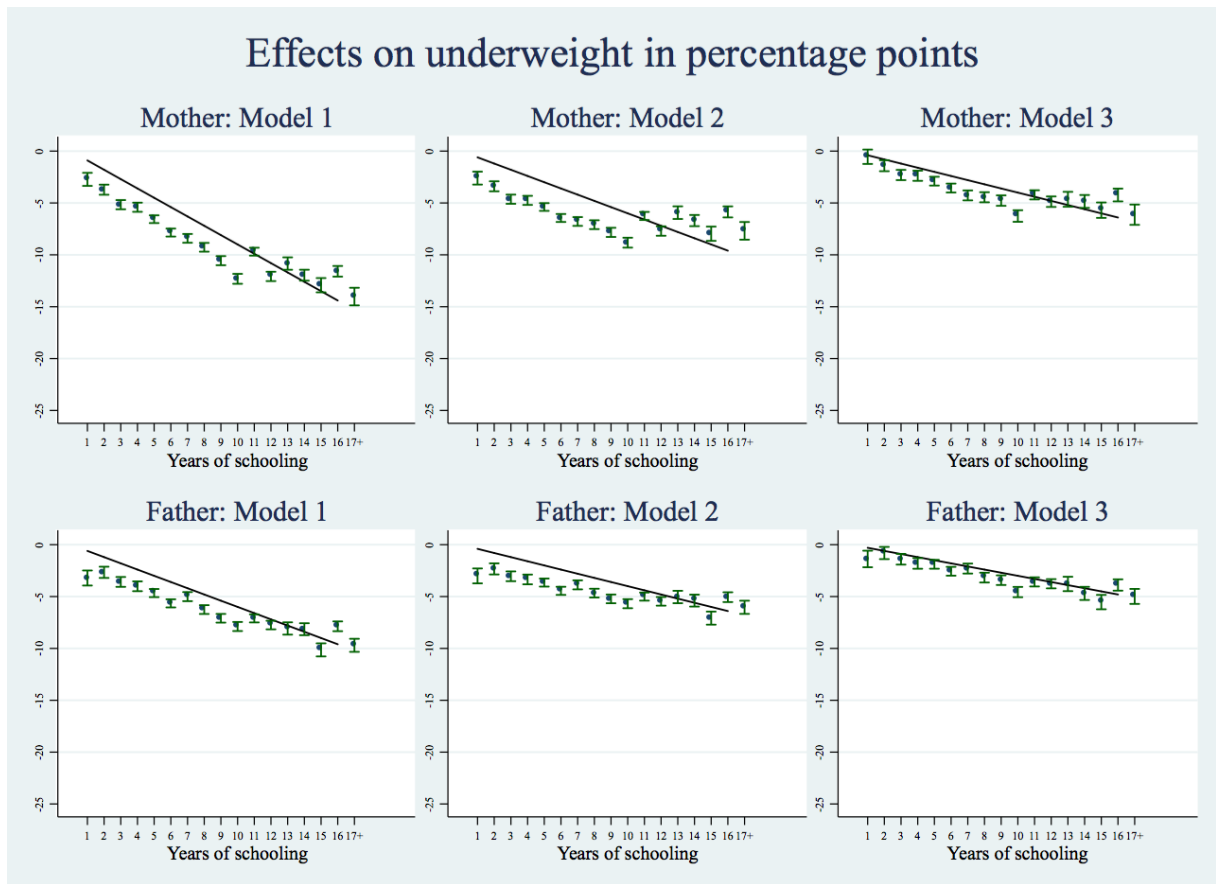

The above graphs depict trend lines (black lines) showing the effect of years of schooling (derived from the marginal effects of the first section of Table 4 from the article) on underweight for different values of years of schooling. The blue dots are point estimates from a flexible regression using each year of schooling as a dummy variable (with zero years as a reference category and school years larger or equal than 17 pooled in one binary indicator). 95%-confidence intervals are depicted in green. All regressions are mutually adjusted, i.e. they include both maternal and paternal school years.

Figure B3: Test of linearity assumption (wasting)

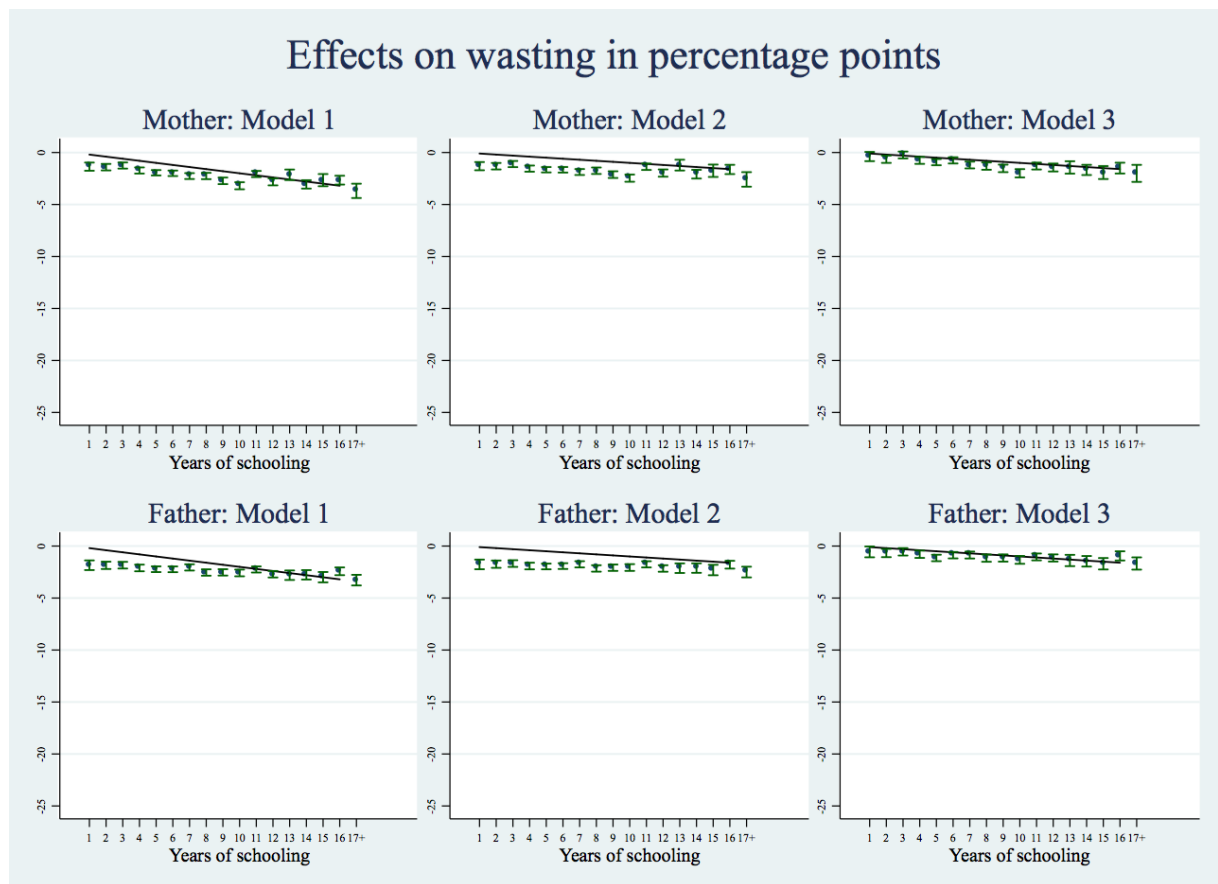

The above graphs depict trend lines (black lines) showing the effect of years of schooling (derived from the marginal effects of the first section of Table 4 from the article) on wasting for different values of years of schooling. The blue dots are point estimates from a flexible regression using each year of schooling as a dummy variable (with zero years as a reference category and school years larger or equal than 17 pooled in one binary indicator). 95%-confidence intervals are depicted in green. All regressions are mutually adjusted, i.e. they include both maternal and paternal school years.

Figure B4: Difference in years of schooling (country-wise regressions)

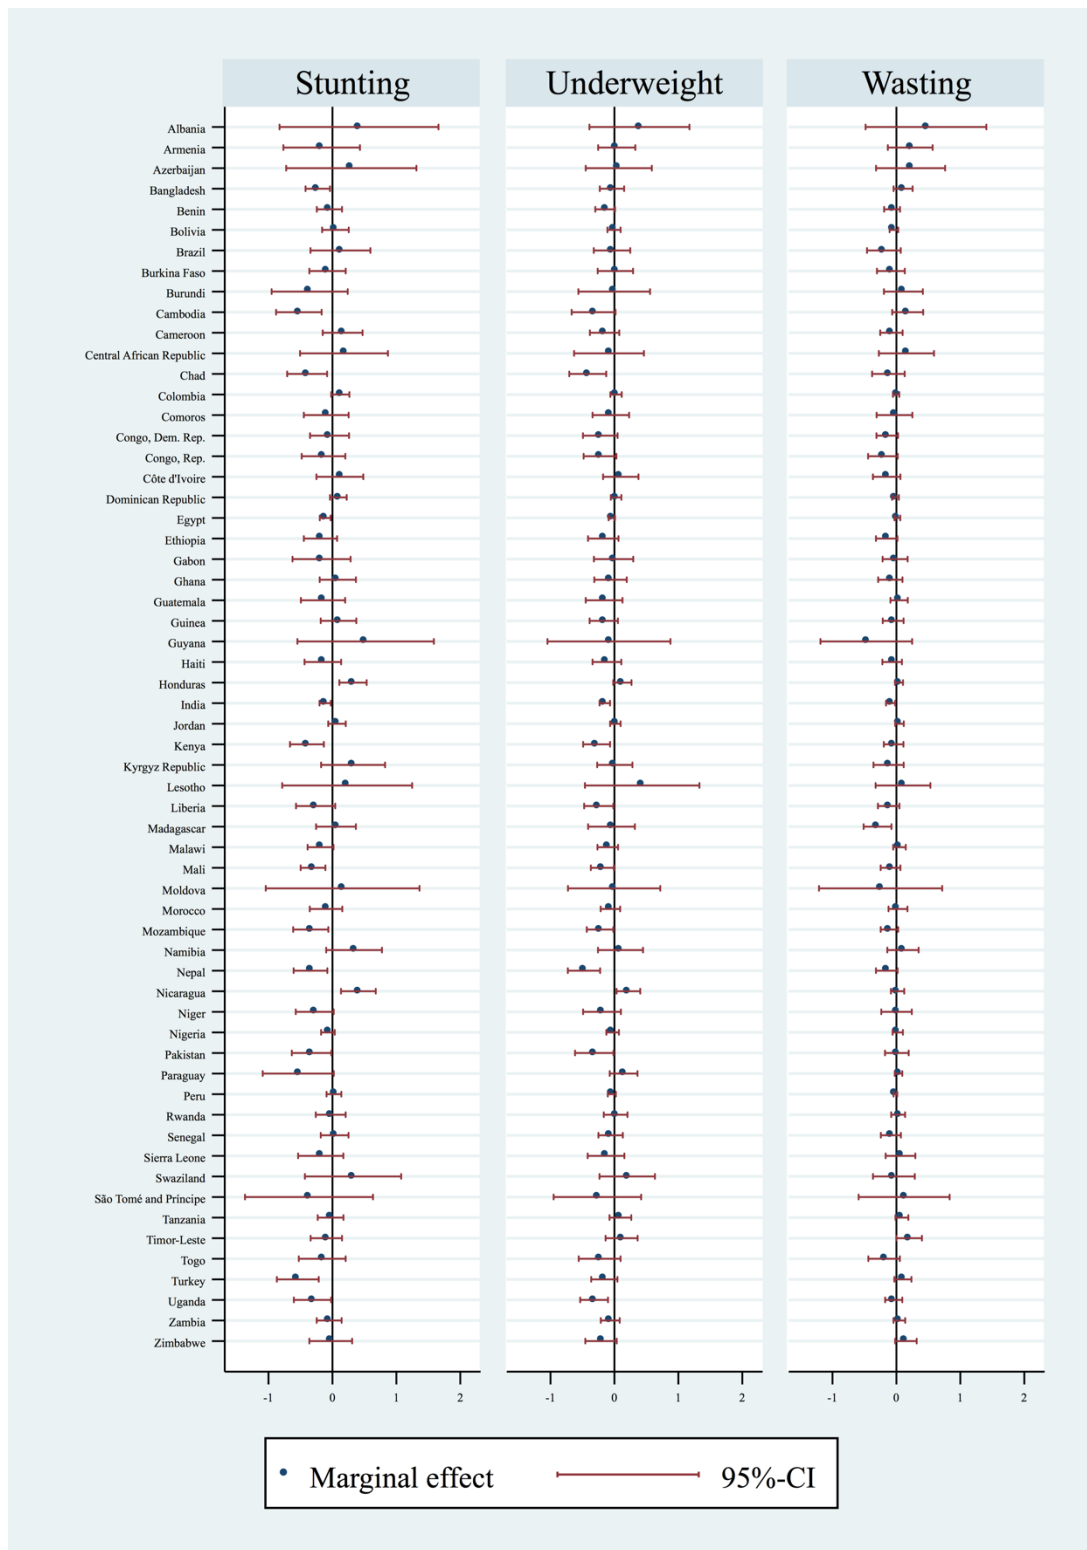

This figure depicts point estimates (marginal effects in percentage points) and 95% confidence intervals from country-wise regressions. The estimated model corresponds to the specification „paternal minus maternal school years“ from Table 4. All regressions include the full set of controls and PSU-level fixed effects (i.e. Model 3). Kazakhstan and the Maldives were excluded due to very long confidence intervals (overlapping with the zero line).

**Figure B5: Ratio of school years (country-wise regressions)**

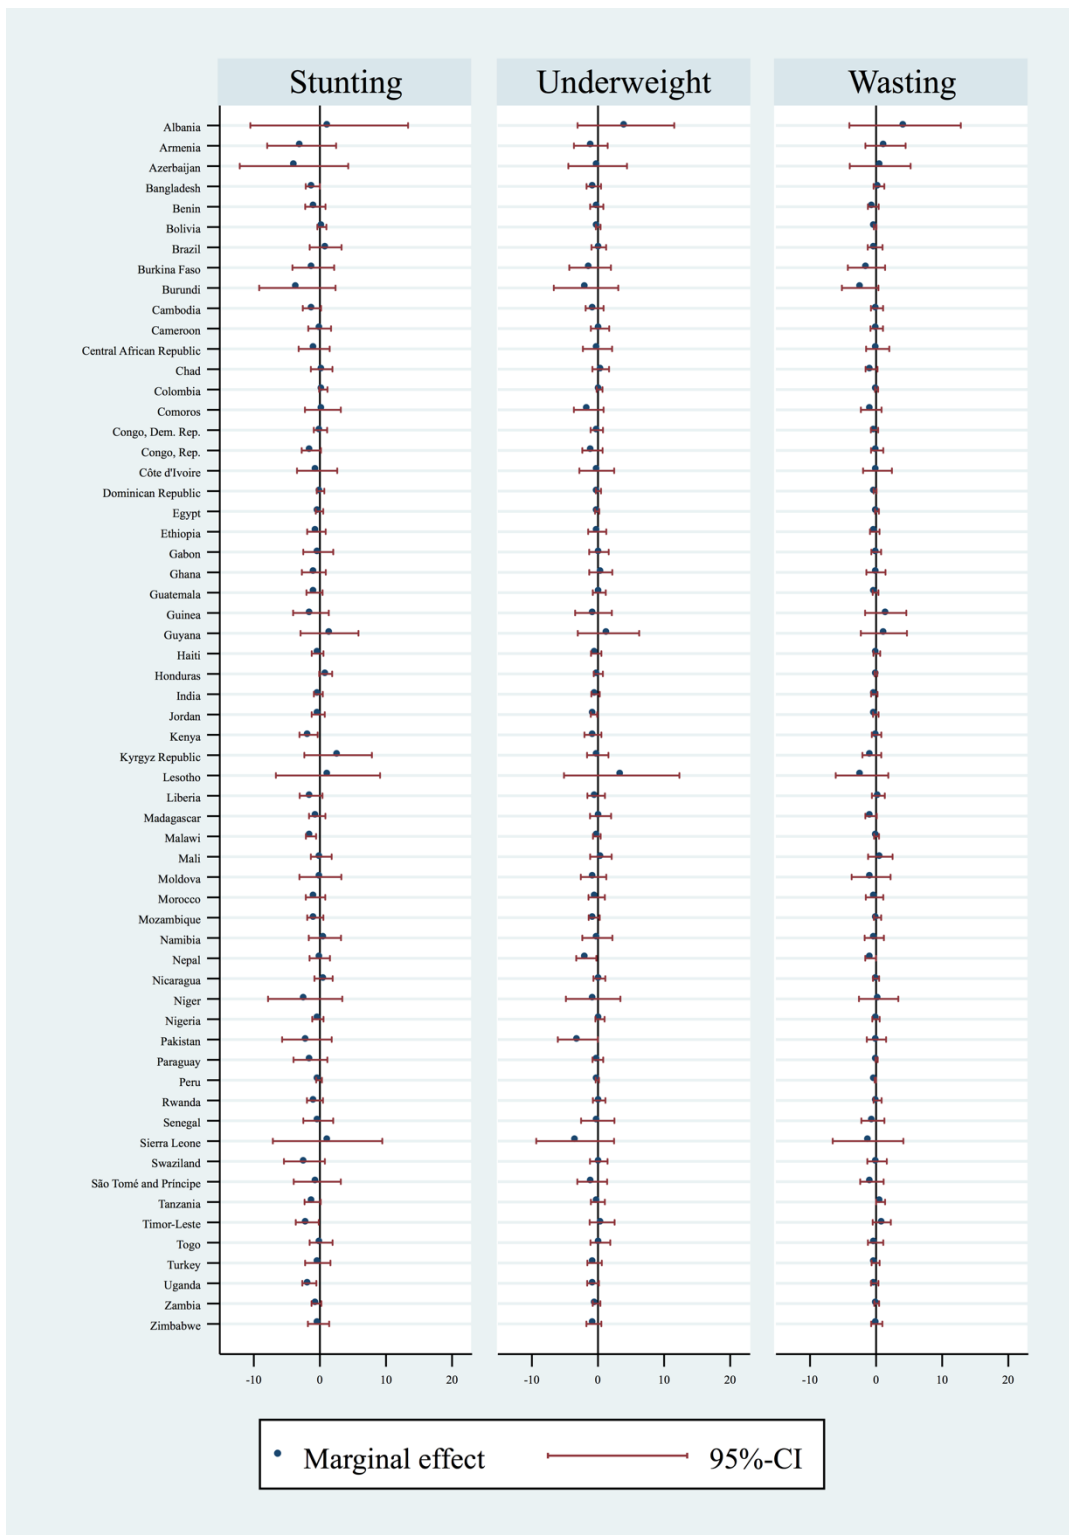

This figure depicts point estimates (marginal effects in percentage points) and 95% confidence intervals from country-wise regressions. The estimated model corresponds to the specification „paternal divided by maternal school years“ from Table 4. All regressions include the full set of controls and PSU-level fixed effects (i.e. Model 3). Two countries are excluded: No marginal effects could be obtained for the Maldives, as the available number of observations was too low. Similarly, Kazakhstan was excluded due to very long confidence intervals (overlapping with the zero line).
